# Supplementary material for: Integrative genomics reveals paths to sex dimorphism in Salix purpurea L
Source: PubMed Central journal article supplement (PMC8325687; doi:10.1038/s41438-021-00606-y), 2021-08-01

Supplementary Figure S1

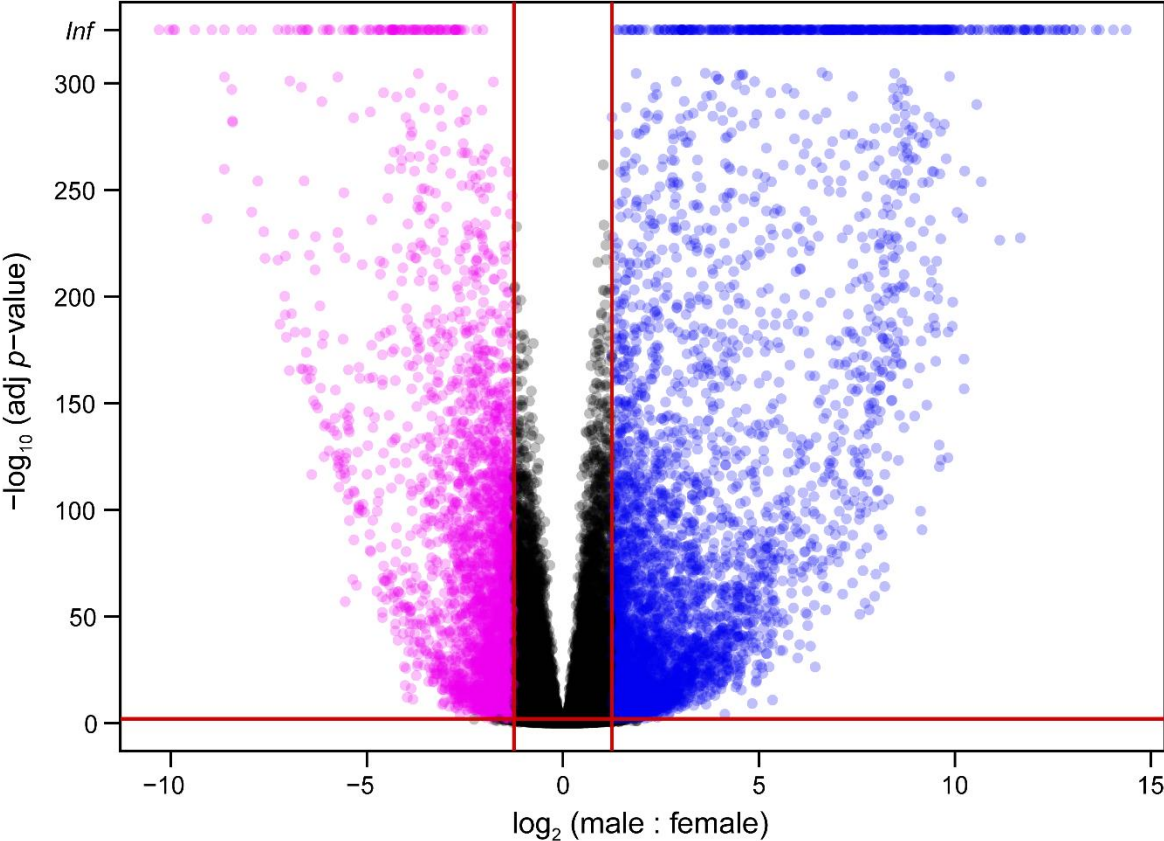

Supplementary Figure S2

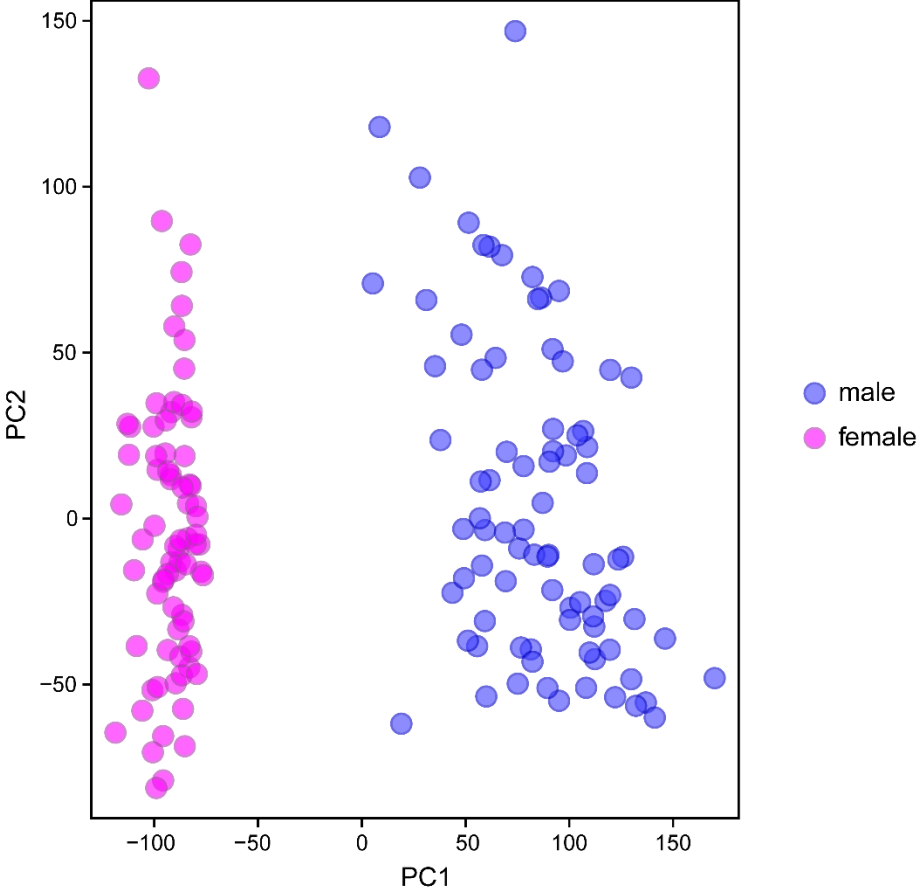

Supplementary Figure S3

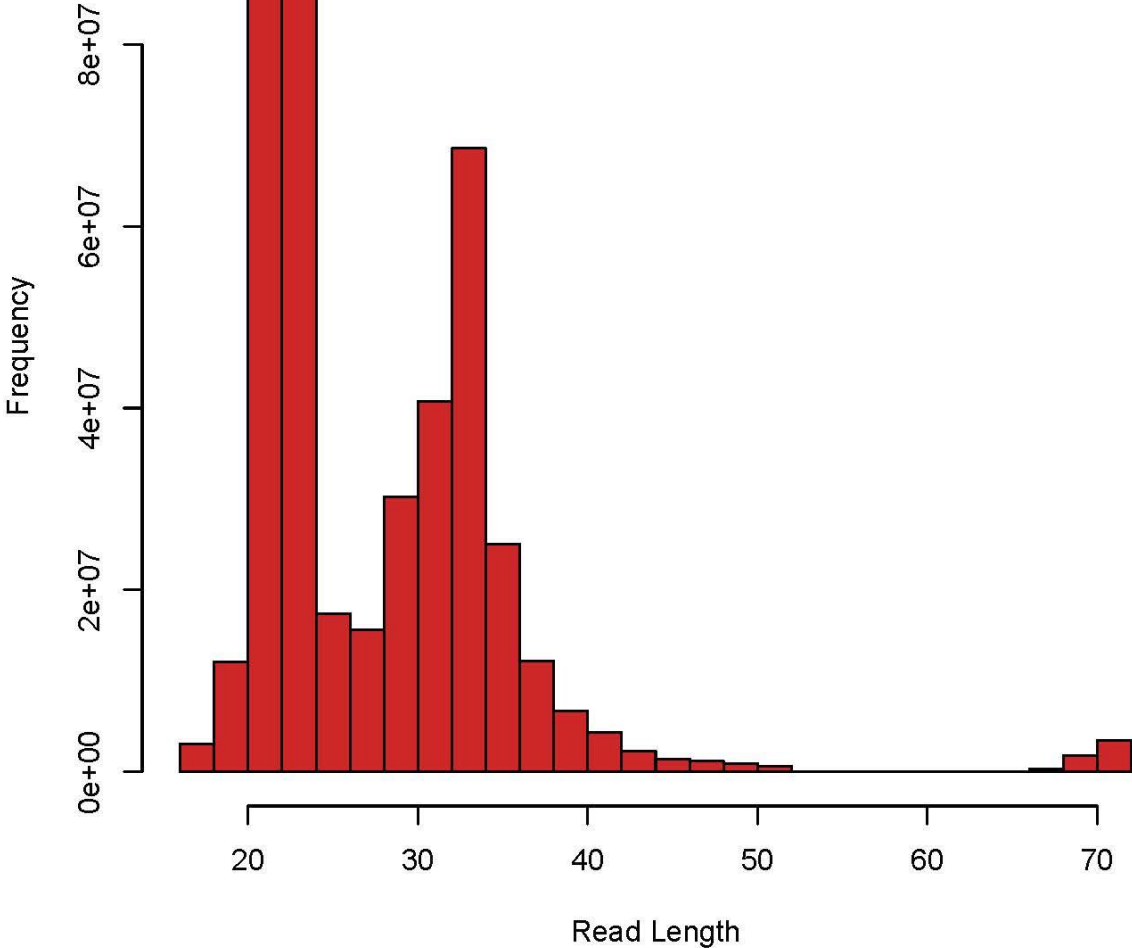

# Supplementary Figure S4A

CLUSTAL multiple sequence alignment by MUSCLE (3.8)

```

Sapur.15WG074400.1.p -----SRKDLPPPPAIIPADVVKTELG--PTYEQTKKAATPKRAPHITRRGF
Sapur.008G005800.1.p HESSD-----AEPEPFKK--KAVRVPJARRGL
Sapur.016G117100.1.p #HDIHSDPEQNGHSGHEALPPPPDPVPMVVPVK----AEPEPFKK--KAVRVPJARRGL
Sapur.016G117100.2.p HESTEDPEAFVPP--PPDALPPPPSEIPMNVVPVQLTDTVSPEETKIKSKPRKPIARRGV
Sapur.016G022500.1.p HESNEEPEAIAP--PPDALPPPPPEIPMNVVPVQLTDTVPEETKIKSKPRKPIARRGV
Sapur.016G022500.2.p -----LILVLSHFPP-----
Sapur.15WG074400.1.p GAKGQRILQLLNHFVAVPKSNGHFYQYSVALFYEDGRPADGKRIGRKVIDKQCYDYDTE
Sapur.008G005800.1.p GSKGKQIPLLNHFVAVPKSNGHFYQYSVALFYEDGRPADGKRIGRKVIDKQCYDYDTE
Sapur.016G117100.1.p GSKGKQIPLLNHFVAVPKSNGHFYQYSVALFYEDGRPADGKRIGRKVIDKQCYDYDTE
Sapur.016G117100.2.p GSRGKQIQLLNHFVAVPKSNGHFYQYSVALFYEDGRPADGKRIGRKVIDKQCYDYDTE
Sapur.006G020100.1.p GSRGKQIQLLNHFVAVPKSNGHFYQYSVALFYEDGRPADGKRIGRKVIDKQCYDYDTE
Sapur.016G022500.2.p GSRGKQIQLLNHFVAVPKSNGHFYQYSVALFYEDGRPADGKRIGRKVIDKQCYDYDTE
Sapur.15WG074400.1.p LEKGLAYDGERTHFTIGSLPHIKLEFVAVLEVDLSLRGGDSDSRGNSPQSDQKRKIK
Sapur.008G005800.1.p F-GKDFAYDGEKSLFTVGLAPRIKLEFVAVLEVDLSLRGGDSDSRGNSPQSDQKRKIK
Sapur.016G117100.1.p F-GKDFAYDGEKSLFTVGLAPRIKLEFVAVLEVDLSLRGGDSDSRGNSPQSDQKRKIK
Sapur.016G117100.2.p LAGKDFAYDGEKSLFTVGLAPRIKLEFVAVLEVDLSLRGGDSDSRGNSPQSDQKRKIK
Sapur.006G020100.1.p LAGKDFAYDGEKSLFTVGLAPRIKLEFVAVLEVDLSLRGGDSDSRGNSPQSDQKRKIK
Sapur.016G022500.2.p LAGKDFAYDGEKSLFTVGLAPRIKLEFVAVLEVDLSLRGGDSDSRGNSPQSDQKRKIK
Sapur.15WG074400.1.p -----RPYHSTIKVQISYATKIPVQATAAALVQGGSEHFQEAQRVLDIILRQHAARQGLLVRQ
Sapur.008G005800.1.p RPYHSTIKVQISYATKIPVQATAAALVQGGSEHFQEAQRVLDIILRQHAARQGLLVRQ
Sapur.016G117100.1.p RPYHSTIKVQISYATKIPVQATAAALVQGGSEHFQEAQRVLDIILRQHAARQGLLVRQ
Sapur.016G117100.2.p RPYHSTIKVQISYATKIPVQATAAALVQGGSEHFQEAQRVLDIILRQHAARQGLLVRQ
Sapur.006G020100.1.p RPYHSTIKVQISYATKIPVQATAAALVQGGSEHFQEAQRVLDIILRQHAARQGLLVRQ
Sapur.016G022500.2.p RPYHSTIKVQISYATKIPVQATAAALVQGGSEHFQEAQRVLDIILRQHAARQGLLVRQ
Sapur.15WG074400.1.p SFFHNDPKMNFVLDGGVLCGRGFSHFRAAQGLSLNIDVSTTHIQPQVDFLIANQN
Sapur.008G005800.1.p SFFHNDPKMNFVLDGGVLCGRGFSHFRAAQGLSLNIDVSTTHIQPQVDFLIANQN
Sapur.016G117100.1.p SFFHNDPKMNFVLDGGVLCGRGFSHFRAAQGLSLNIDVSTTHIQPQVDFLIANQN
Sapur.016G117100.2.p SFFHNDPKMNFVLDGGVLCGRGFSHFRAAQGLSLNIDVSTTHIQPQVDFLIANQN
Sapur.006G020100.1.p SFFHNDPKMNFVLDGGVLCGRGFSHFRAAQGLSLNIDVSTTHIQPQVDFLIANQN
Sapur.016G022500.2.p SFFHNDPKMNFVLDGGVLCGRGFSHFRAAQGLSLNIDVSTTHIQPQVDFLIANQN
Sapur.15WG074400.1.p -----HPY-----
Sapur.008G005800.1.p VRDPYIDWTKAKRRLKMLRIKTHNSNTYKITGLSEKSCREQTFLNQRSGRVGDEGVQ
Sapur.016G117100.1.p VRDPYIDWTKAKRRLKMLRIKTHNSNTYKITGLSEKSCREQTFLNQRSGRVGDEGVQ
Sapur.016G117100.2.p VRDPYIDWTKAKRRLKMLRIKTHNSNTYKITGLSEKSCREQTFLNQRSGRVGDEGVQ
Sapur.006G020100.1.p VSNPQIDWTKAKRRLKMLRIKTHNSNTYKITGLSEKSCREQTFLNQRSGRVGDEGVQ
Sapur.016G022500.2.p VSNPQIDWTKAKRRLKMLRIKTHNSNTYKITGLSEKSCREQTFLNQRSGRVGDEGVQ
Sapur.15WG074400.1.p -----TIEVTVYDFVHNRNIDLRYSGDLPFCINWGPKRPTVYVLELCSLVSQRYTKALSTLQR
Sapur.008G005800.1.p TIEVTVYDFVHNRNIDLRYSGDLPFCINWGPKRPTVYVLELCSLVSQRYTKALSTLQR
Sapur.016G117100.1.p TIEVTVYDFVHNRNIDLRYSGDLPFCINWGPKRPTVYVLELCSLVSQRYTKALSTLQR
Sapur.016G117100.2.p TIEVTVYDFVHNRNIDLRYSGDLPFCINWGPKRPTVYVLELCSLVSQRYTKALSTLQR
Sapur.006G020100.1.p TIEVTVYDFVHNRNIDLRYSGDLPFCINWGPKRPTVYVLELCSLVSQRYTKALSTLQR
Sapur.016G022500.2.p TIEVTVYDFVHNRNIDLRYSGDLPFCINWGPKRPTVYVLELCSLVSQRYTKALSTLQR
Sapur.15WG074400.1.p ASLVEKSRQPKQERIRLTDALRSSNYADPILRSSGISISPOQTQVEGRVLSAPKLVKG
Sapur.008G005800.1.p ASLVEKSRQPKQERIRLTDALRSSNYADPILRSSGISISPOQTQVEGRVLSAPKLVKG
Sapur.016G117100.1.p ASLVEKSRQPKQERIRLTDALRSSNYADPILRSSGISISPOQTQVEGRVLSAPKLVKG
Sapur.016G117100.2.p ASLVEKSRQPKQERIRLTDALRSSNYADPILRSSGISISPOQTQVEGRVLSAPKLVKG
Sapur.006G020100.1.p ASLVEKSRQPKQERIRLTDALRSSNYADPILRSSGISISPOQTQVEGRVLSAPKLVKG
Sapur.016G022500.2.p ASLVEKSRQPKQERIRLTDALRSSNYADPILRSSGISISPOQTQVEGRVLSAPKLVKG
Sapur.15WG074400.1.p -----QLGGINSLSLSTEHAPSIPLVSKRPTLILGIDV
Sapur.008G005800.1.p ELGZVTQCIAPTKLNQVLTNVLKINAKLGGNSLSTEHAPSIPLVSKRPTLILGIDV
Sapur.016G117100.1.p ELGZVTQCIAPTKLNQVLTNVLKINAKLGGNSLSTEHAPSIPLVSKRPTLILGIDV
Sapur.016G117100.2.p ELGZVTQCIAPTKLNQVLTNVLKINAKLGGNSLSTEHAPSIPLVSKRPTLILGIDV
Sapur.006G020100.1.p ELGZVTQCIAPTKLNQVLTNVLKINAKLGGNSLSTEHAPSIPLVSKRPTLILGIDV
Sapur.016G022500.2.p ELGZVTQCIAPTKLNQVLTNVLKINAKLGGNSLSTEHAPSIPLVSKRPTLILGIDV
Sapur.15WG074400.1.p -----SHSGPQSDVPSIAAVIN-----
Sapur.008G005800.1.p SHSGPQSDVPSIAAVIN-----
Sapur.016G117100.1.p SHSGPQSDVPSIAAVIN-----
Sapur.016G117100.2.p SHSGPQSDVPSIAAVIN-----
Sapur.006G020100.1.p SHSGPQSDVPSIAAVIN-----
Sapur.016G022500.2.p SHSGPQSDVPSIAAVIN-----
Sapur.15WG074400.1.p -----IFSD-----
Sapur.008G005800.1.p ESLVDFYSSGKRPQDIIIFRDGVSSEQFNQVNLIELOQINEACKFLDEKNSPKFVIV
Sapur.016G117100.1.p ESLVDFYSSGKRPQDIIIFRDGVSSEQFNQVNLIELOQINEACKFLDEKNSPKFVIV
Sapur.016G117100.2.p ESLVDFYSSGKRPQDIIIFRDGVSSEQFNQVNLIELOQINEACKFLDEKNSPKFVIV
Sapur.006G020100.1.p ESLVDFYSSGKRPQDIIIFRDGVSSEQFNQVNLIELOQINEACKFLDEKNSPKFVIV
Sapur.016G022500.2.p ESLVDFYSSGKRPQDIIIFRDGVSSEQFNQVNLIELOQINEACKFLDEKNSPKFVIV
Sapur.15WG074400.1.p -----HWI-----
Sapur.008G005800.1.p AQKHHHTKFFQSGSDPWVPGTVIDNKVCHPRNDVLYCAHAGIIGTTRPTHYHLLDEI
Sapur.016G117100.1.p AQKHHHTKFFQSGSDPWVPGTVIDNKVCHPRNDVLYCAHAGIIGTTRPTHYHLLDEI
Sapur.016G117100.2.p AQKHHHTKFFQSGSDPWVPGTVIDNKVCHPRNDVLYCAHAGIIGTTRPTHYHLLDEI
Sapur.006G020100.1.p AQKHHHTKFFQSGSDPWVPGTVIDNKVCHPRNDVLYCAHAGIIGTTRPTHYHLLDEI
Sapur.016G022500.2.p AQKHHHTKFFQSGSDPWVPGTVIDNKVCHPRNDVLYCAHAGIIGTTRPTHYHLLDEI
Sapur.15WG074400.1.p -----GFSAADLQELVHLSLVYVQRSTTAVSLVAPVYAHLAASQIHFQKFDLSDTSSSHGGV
Sapur.008G005800.1.p GFSAADLQELVHLSLVYVQRSTTAVSLVAPVYAHLAASQIHFQKFDLSDTSSSHGGV
Sapur.016G117100.1.p GFSAADLQELVHLSLVYVQRSTTAVSLVAPVYAHLAASQIHFQKFDLSDTSSSHGGV
Sapur.016G117100.2.p GFSAADLQELVHLSLVYVQRSTTAVSLVAPVYAHLAASQIHFQKFDLSDTSSSHGGV
Sapur.006G020100.1.p GFSAADLQELVHLSLVYVQRSTTAVSLVAPVYAHLAASQIHFQKFDLSDTSSSHGGV
Sapur.016G022500.2.p GFSAADLQELVHLSLVYVQRSTTAVSLVAPVYAHLAASQIHFQKFDLSDTSSSHGGV
Sapur.15WG074400.1.p -----TIPGAVVPELPRLDHNVSSSHFFC
Sapur.008G005800.1.p TIPGAVVPELPRLDHNVSSSHFFC
Sapur.016G117100.1.p TIPGAVVPELPRLDHNVSSSHFFC
Sapur.016G117100.2.p TIPGAVVPELPRLDHNVSSSHFFC
Sapur.006G020100.1.p TIPGAVVPELPRLDHNVSSSHFFC
Sapur.016G022500.2.p TIPGAVVPELPRLDHNVSSSHFFC

```

# Supplementary Figure S4B

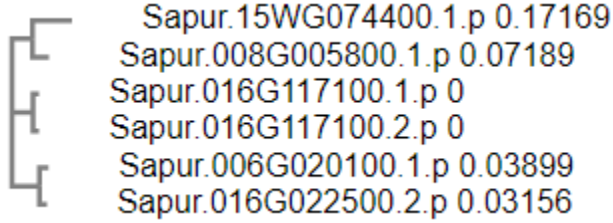



### Supplementary Figure S5B

Score = 212 bits (234), Expect = 4e-54  
Identities = 121/122 (99%), Gaps = 1/122 (1%)  
Strand=Plus/Minus

```
Query 1      GGAGGCACTGATGATGTTGTTGACAGAAGATAGAGAGCACAGATGATGGTATGCAATGGG 60
             |||
Sbjct 4026937 GGAGGCACTGATGATGTTGTTGACAGAAGATAGAGAGCACAGATGATGGTATGCAATGGG 4026878

Query 61     CTCTGCATCCCCTCCTTTGTGCTCTCTAAGCTTCTGTTCATCACTTTCAGCCCCGACCC 120
             |||
Sbjct 4026877 CTCTGCATCCCCTCCTTTGTGCTCTCTAAGCTTCTGTTCATCACTTTCAG-CCCCGACCC 4026819

Query 121    CC 122
             ||
Sbjct 4026818 CC 4026817
```

Supplementary Figure S6

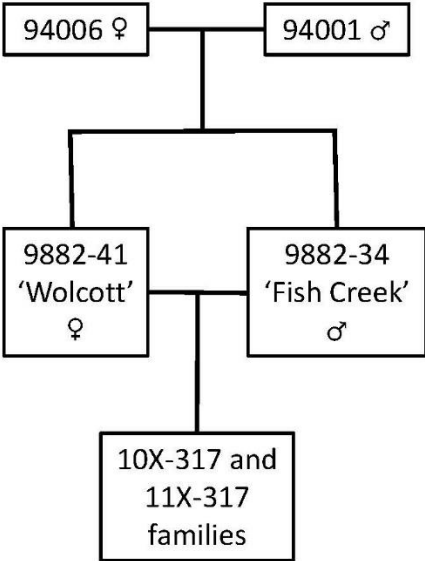



## Supplementary Figure S7

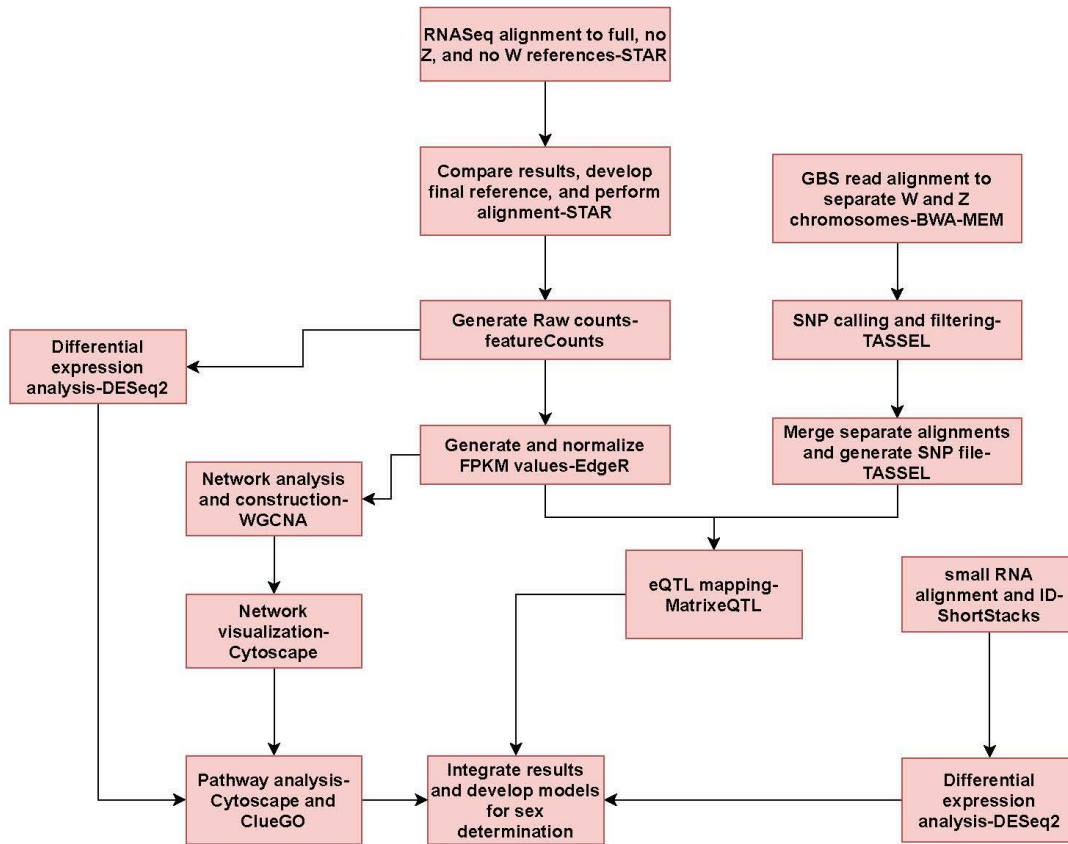



# Supplementary Figure S8

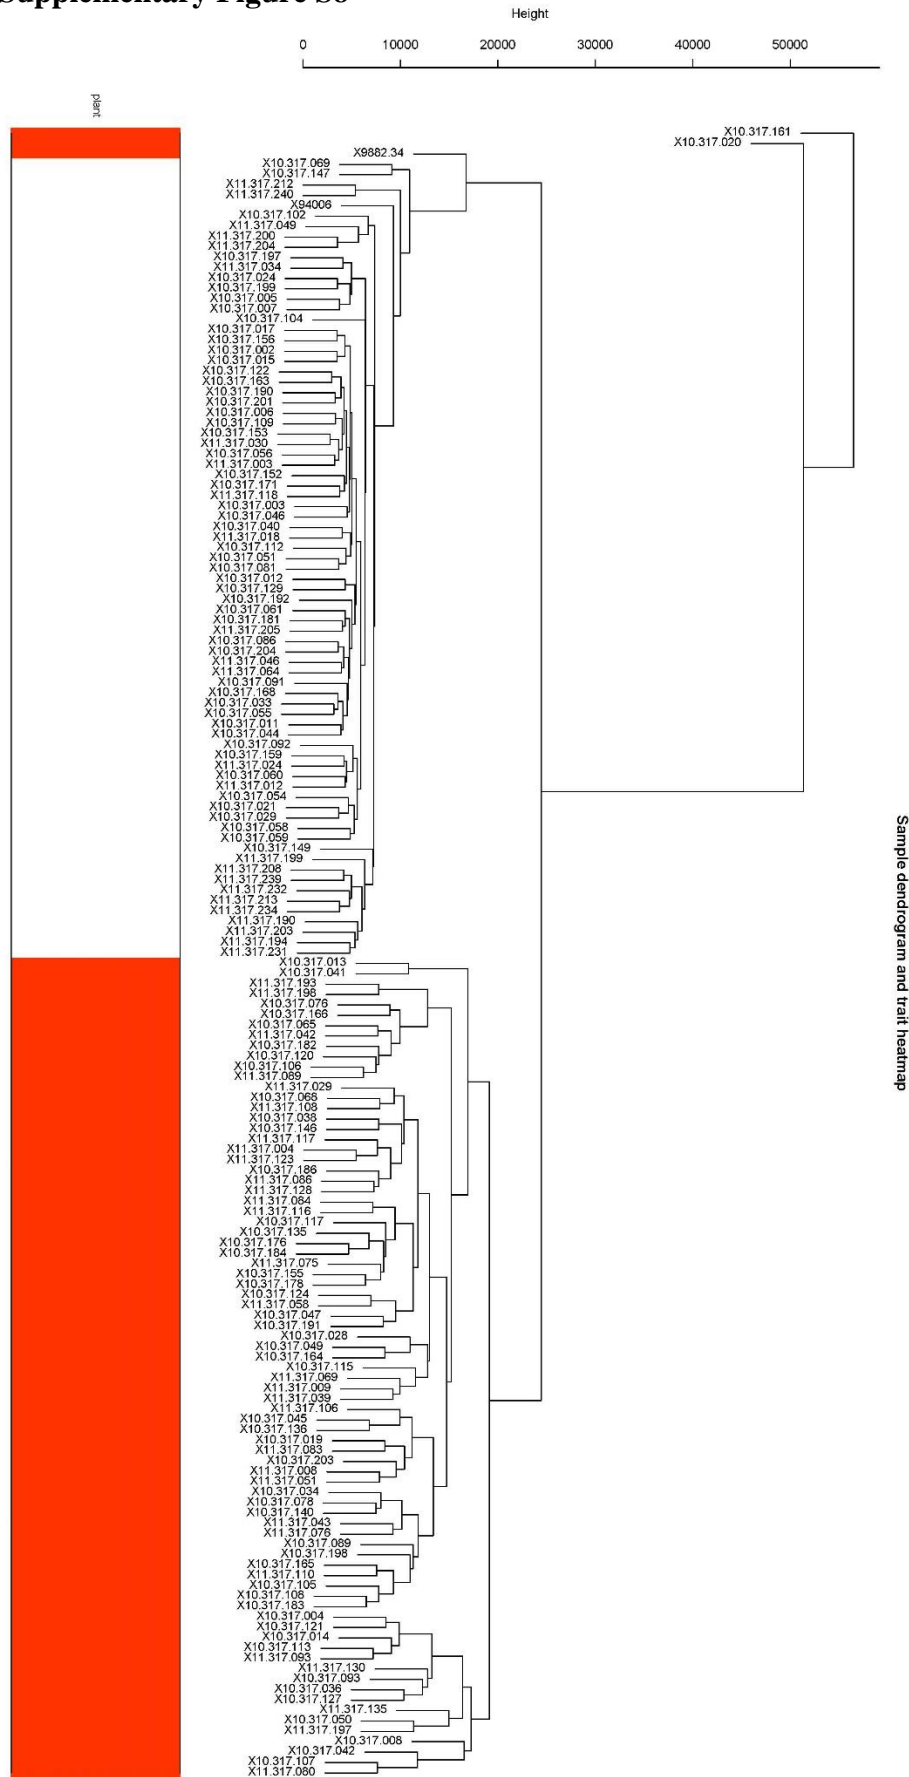

Supplement: 41438_2021_606_MOESM2_ESM.pdf [file 41438_2021_606_MOESM2_ESM.pdf]
