# Supplementary material for: Integrative genomics reveals paths to sex dimorphism in Salix purpurea L
Source: PubMed Central journal article supplement (PMC8325687; doi:10.1038/s41438-021-00606-y), 2021-08-01
Supplement: 41438_2021_606_MOESM3_ESM.pdf [file 41438_2021_606_MOESM3_ESM.pdf]

## Supplementary Table S1

| GO ID | GO Description                                        | Genes Present | FDR      |
|-------|-------------------------------------------------------|---------------|----------|
| 272   | polysaccharide catabolic process                      | 28            | 7.25E-04 |
| 5975  | carbohydrate metabolic process                        | 131           | 4.29E-06 |
| 5976  | polysaccharide metabolic process                      | 52            | 1.09E-03 |
| 6468  | protein amino acid phosphorylation                    | 95            | 7.82E-04 |
| 6629  | lipid metabolic process                               | 92            | 9.42E-03 |
| 6793  | phosphorus metabolic process                          | 135           | 2.39E-03 |
| 6796  | phosphate metabolic process                           | 135           | 2.39E-03 |
| 6811  | ion transport                                         | 54            | 7.25E-04 |
| 6812  | cation transport                                      | 47            | 1.13E-04 |
| 6813  | potassium ion transport                               | 12            | 1.03E-02 |
| 6816  | calcium ion transport                                 | 10            | 2.48E-02 |
| 6873  | cellular ion homeostasis                              | 23            | 1.03E-02 |
| 6885  | regulation of pH                                      | 13            | 7.42E-04 |
| 6970  | response to osmotic stress                            | 27            | 1.81E-02 |
| 7276  | gamete generation                                     | 6             | 3.73E-02 |
| 9269  | response to desiccation                               | 7             | 1.36E-02 |
| 9414  | response to water deprivation                         | 20            | 4.73E-02 |
| 9415  | response to water                                     | 20            | 4.73E-02 |
| 9555  | pollen development                                    | 20            | 6.94E-04 |
| 9651  | response to salt stress                               | 25            | 1.58E-02 |
| 9690  | cytokinin metabolic process                           | 7             | 3.81E-02 |
| 10208 | pollen wall assembly                                  | 7             | 2.00E-02 |
| 10584 | pollen exine formation                                | 6             | 3.73E-02 |
| 10927 | cellular component assembly involved in morphogenesis | 7             | 2.00E-02 |
| 15672 | monovalent inorganic cation transport                 | 16            | 2.22E-02 |
| 15674 | di-, tri-valent inorganic cation transport            | 19            | 1.30E-02 |
| 16042 | lipid catabolic process                               | 32            | 3.04E-03 |
| 16052 | carbohydrate catabolic process                        | 46            | 2.15E-04 |
| 16103 | diterpenoid catabolic process                         | 4             | 1.03E-02 |
| 16139 | glycoside catabolic process                           | 7             | 9.42E-03 |
| 16145 | S-glycoside catabolic process                         | 4             | 2.71E-02 |
| 16310 | phosphorylation                                       | 114           | 2.00E-02 |
| 19748 | secondary metabolic process                           | 36            | 1.81E-02 |
| 19759 | glycosinolate catabolic process                       | 4             | 2.71E-02 |
| 19762 | glucosinolate catabolic process                       | 4             | 2.71E-02 |
| 19953 | sexual reproduction                                   | 13            | 9.42E-03 |
| 30001 | metal ion transport                                   | 46            | 7.12E-06 |
| 30198 | extracellular matrix organization                     | 7             | 2.71E-02 |

|       |                                                  |     |          |
|-------|--------------------------------------------------|-----|----------|
| 32504 | multicellular organism reproduction              | 10  | 2.78E-02 |
| 33499 | galactose catabolic process via UDP-galactose    | 5   | 4.73E-02 |
| 42221 | response to chemical stimulus                    | 159 | 1.58E-02 |
| 42542 | response to hydrogen peroxide                    | 16  | 3.73E-02 |
| 42545 | cell wall modification                           | 22  | 6.81E-04 |
| 42592 | homeostatic process                              | 51  | 9.87E-03 |
| 42743 | hydrogen peroxide metabolic process              | 14  | 4.19E-02 |
| 42744 | hydrogen peroxide catabolic process              | 14  | 4.19E-02 |
| 43062 | extracellular structure organization             | 7   | 2.71E-02 |
| 44247 | cellular polysaccharide catabolic process        | 18  | 1.17E-02 |
| 44262 | cellular carbohydrate metabolic process          | 87  | 1.51E-02 |
| 44264 | cellular polysaccharide metabolic process        | 41  | 1.78E-02 |
| 44273 | sulfur compound catabolic process                | 5   | 4.73E-02 |
| 44275 | cellular carbohydrate catabolic process          | 36  | 3.04E-03 |
| 45229 | external encapsulating structure organization    | 9   | 2.20E-03 |
| 45487 | gibberellin catabolic process                    | 4   | 1.03E-02 |
| 45488 | pectin metabolic process                         | 22  | 1.49E-03 |
| 45490 | pectin catabolic process                         | 18  | 5.89E-04 |
| 45493 | xylan catabolic process                          | 5   | 2.78E-02 |
| 48229 | gametophyte development                          | 25  | 2.61E-03 |
| 48232 | male gamete generation                           | 6   | 2.50E-02 |
| 48235 | pollen sperm cell differentiation                | 6   | 2.50E-02 |
| 48609 | reproductive process in a multicellular organism | 10  | 2.78E-02 |
| 48610 | reproductive cellular process                    | 18  | 2.39E-03 |
| 48878 | chemical homeostasis                             | 44  | 8.22E-06 |
| 50801 | ion homeostasis                                  | 40  | 4.29E-06 |
| 51017 | actin filament bundle assembly                   | 5   | 4.73E-02 |
| 55046 | microgametogenesis                               | 6   | 2.50E-02 |
| 55066 | di-, tri-valent inorganic cation homeostasis     | 22  | 2.50E-02 |
| 55067 | monovalent inorganic cation homeostasis          | 14  | 1.06E-03 |
| 55080 | cation homeostasis                               | 36  | 3.69E-05 |
| 55082 | cellular chemical homeostasis                    | 23  | 1.30E-02 |
| 65008 | regulation of biological quality                 | 84  | 1.30E-02 |
| 70301 | cellular response to hydrogen peroxide           | 14  | 4.73E-02 |
| 70838 | divalent metal ion transport                     | 12  | 3.09E-02 |
| 71554 | cell wall organization or biogenesis             | 80  | 2.56E-10 |
| 71555 | cell wall organization                           | 66  | 6.44E-08 |
| 71669 | plant-type cell wall organization or biogenesis  | 21  | 4.50E-02 |

---

## Supplementary Table S2

| GO ID | GO Description                                                                       | Genes Present | FDR      |
|-------|--------------------------------------------------------------------------------------|---------------|----------|
| 375   | RNA splicing, via transesterification reactions                                      | 1             | 3.64E-02 |
| 377   | RNA splicing, via transesterification reactions with bulged adenosine as nucleophile | 1             | 3.64E-02 |
| 6139  | nucleobase, nucleoside, nucleotide and nucleic acid metabolic process                | 43            | 6.81E-25 |
| 6259  | DNA metabolic process                                                                | 11            | 9.50E-05 |
| 6260  | DNA replication                                                                      | 2             | 9.57E-03 |
| 6261  | DNA-dependent DNA replication                                                        | 0             | 3.21E-03 |
| 6281  | DNA repair                                                                           | 6             | 6.16E-03 |
| 6364  | rRNA processing                                                                      | 0             | 1.66E-03 |
| 6396  | RNA processing                                                                       | 9             | 9.19E-11 |
| 6397  | mRNA processing                                                                      | 6             | 4.94E-05 |
| 6399  | tRNA metabolic process                                                               | 2             | 3.21E-02 |
| 6403  | RNA localization                                                                     | 0             | 2.63E-02 |
| 6412  | translation                                                                          | 11            | 1.56E-05 |
| 6511  | ubiquitin-dependent protein catabolic process                                        | 11            | 4.35E-03 |
| 6605  | protein targeting                                                                    | 3             | 2.15E-04 |
| 6807  | nitrogen compound metabolic process                                                  | 73            | 1.07E-24 |
| 6913  | nucleocytoplasmic transport                                                          | 0             | 1.51E-02 |
| 6974  | response to DNA damage stimulus                                                      | 7             | 4.35E-03 |
| 6996  | organelle organization                                                               | 55            | 2.87E-03 |
| 7005  | mitochondrion organization                                                           | 2             | 7.99E-03 |
| 8152  | metabolic process                                                                    | 596           | 4.43E-02 |
| 8380  | RNA splicing                                                                         | 1             | 4.49E-04 |
| 9058  | biosynthetic process                                                                 | 149           | 9.42E-03 |
| 9059  | macromolecule biosynthetic process                                                   | 53            | 4.17E-05 |
| 9108  | coenzyme biosynthetic process                                                        | 1             | 4.33E-02 |
| 9451  | RNA modification                                                                     | 4             | 5.90E-06 |
| 10467 | gene expression                                                                      | 27            | 3.95E-19 |
| 16070 | RNA metabolic process                                                                | 19            | 4.04E-19 |
| 16071 | mRNA metabolic process                                                               | 7             | 5.90E-06 |
| 16072 | rRNA metabolic process                                                               | 0             | 5.94E-04 |
| 17038 | protein import                                                                       | 0             | 4.76E-04 |
| 18130 | heterocycle biosynthetic process                                                     | 1             | 2.38E-03 |
| 19941 | modification-dependent protein catabolic process                                     | 13            | 1.55E-02 |
| 22613 | ribonucleoprotein complex biogenesis                                                 | 2             | 5.07E-07 |
| 22618 | ribonucleoprotein complex assembly                                                   | 2             | 4.54E-02 |
| 30163 | protein catabolic process                                                            | 22            | 2.49E-02 |
| 33365 | protein localization in organelle                                                    | 0             | 1.08E-04 |

|       |                                                            |     |          |
|-------|------------------------------------------------------------|-----|----------|
| 34470 | ncRNA processing                                           | 3   | 1.73E-03 |
| 34613 | cellular protein localization                              | 22  | 4.43E-02 |
| 34621 | cellular macromolecular complex subunit organization       | 11  | 9.09E-05 |
| 34622 | cellular macromolecular complex assembly                   | 10  | 1.36E-03 |
| 34641 | cellular nitrogen compound metabolic process               | 62  | 2.53E-27 |
| 34645 | cellular macromolecule biosynthetic process                | 52  | 2.49E-05 |
| 34660 | ncRNA metabolic process                                    | 2   | 5.31E-06 |
| 42254 | ribosome biogenesis                                        | 1   | 5.22E-06 |
| 42440 | pigment metabolic process                                  | 1   | 4.33E-02 |
| 43170 | macromolecule metabolic process                            | 290 | 2.67E-08 |
| 43632 | modification-dependent macromolecule catabolic process     | 13  | 1.00E-02 |
| 43933 | macromolecular complex subunit organization                | 15  | 2.97E-04 |
| 44237 | cellular metabolic process                                 | 451 | 3.55E-07 |
| 44238 | primary metabolic process                                  | 481 | 4.43E-02 |
| 44249 | cellular biosynthetic process                              | 137 | 1.36E-03 |
| 44257 | cellular protein catabolic process                         | 18  | 1.76E-02 |
| 44260 | cellular macromolecule metabolic process                   | 262 | 3.36E-09 |
| 44265 | cellular macromolecule catabolic process                   | 23  | 6.53E-03 |
| 44271 | cellular nitrogen compound biosynthetic process            | 19  | 1.20E-02 |
| 46483 | heterocycle metabolic process                              | 15  | 4.54E-02 |
| 46907 | intracellular transport                                    | 25  | 2.81E-04 |
| 50657 | nucleic acid transport                                     | 0   | 4.33E-02 |
| 50658 | RNA transport                                              | 0   | 4.33E-02 |
| 51169 | nuclear transport                                          | 0   | 1.51E-02 |
| 51186 | cofactor metabolic process                                 | 13  | 5.81E-03 |
| 51188 | cofactor biosynthetic process                              | 1   | 1.00E-04 |
| 51236 | establishment of RNA localization                          | 0   | 4.33E-02 |
| 51276 | chromosome organization                                    | 10  | 1.24E-02 |
| 51603 | proteolysis involved in cellular protein catabolic process | 18  | 2.14E-02 |
| 51641 | cellular localization                                      | 37  | 6.53E-03 |
| 51649 | establishment of localization in cell                      | 33  | 6.54E-03 |
| 65003 | macromolecular complex assembly                            | 14  | 3.61E-03 |
| 70727 | cellular macromolecule localization                        | 22  | 3.50E-02 |
| 90304 | nucleic acid metabolic process                             | 29  | 6.81E-25 |

---

## Supplementary Table S3

| GO ID | GO Description                                                                      | Genes Represented | FDR      |
|-------|-------------------------------------------------------------------------------------|-------------------|----------|
| 3002  | regionalization                                                                     | 12                | 2.56E-03 |
| 6355  | regulation of transcription, DNA-dependent                                          | 109               | 2.74E-04 |
| 7275  | multicellular organismal development                                                | 92                | 1.34E-02 |
| 7389  | pattern specification process                                                       | 13                | 6.35E-03 |
| 9719  | response to endogenous stimulus                                                     | 58                | 3.84E-02 |
| 9755  | hormone-mediated signaling pathway                                                  | 42                | 4.61E-02 |
| 9889  | regulation of biosynthetic process                                                  | 116               | 4.86E-04 |
| 9943  | adaxial/abaxial axis specification                                                  | 4                 | 2.61E-02 |
| 9944  | polarity specification of adaxial/abaxial axis                                      | 4                 | 2.61E-02 |
| 9955  | adaxial/abaxial pattern formation                                                   | 4                 | 2.61E-02 |
| 10103 | stomatal complex morphogenesis                                                      | 5                 | 4.46E-02 |
| 10374 | stomatal complex development                                                        | 8                 | 1.91E-03 |
| 10468 | regulation of gene expression                                                       | 111               | 9.35E-03 |
| 10556 | regulation of macromolecule biosynthetic process                                    | 113               | 7.23E-04 |
| 19219 | regulation of nucleobase, nucleoside, nucleotide and nucleic acid metabolic process | 113               | 4.86E-04 |
| 19222 | regulation of metabolic process                                                     | 127               | 4.69E-03 |
| 22621 | shoot system development                                                            | 24                | 7.68E-06 |
| 30154 | cell differentiation                                                                | 35                | 5.34E-05 |
| 31323 | regulation of cellular metabolic process                                            | 124               | 2.37E-05 |
| 31326 | regulation of cellular biosynthetic process                                         | 115               | 3.35E-06 |
| 32501 | multicellular organismal process                                                    | 103               | 1.47E-05 |
| 32502 | developmental process                                                               | 110               | 1.04E-05 |
| 45449 | regulation of transcription                                                         | 109               | 4.26E-07 |
| 48367 | shoot development                                                                   | 24                | 9.90E-04 |
| 48513 | organ development                                                                   | 39                | 1.76E-03 |
| 48731 | system development                                                                  | 40                | 1.04E-03 |
| 48869 | cellular developmental process                                                      | 43                | 4.62E-03 |
| 51171 | regulation of nitrogen compound metabolic process                                   | 114               | 4.86E-04 |
| 51252 | regulation of RNA metabolic process                                                 | 109               | 4.86E-04 |
| 60255 | regulation of macromolecule metabolic process                                       | 115               | 1.68E-02 |
| 65001 | specification of axis polarity                                                      | 4                 | 2.61E-02 |
| 80090 | regulation of primary metabolic process                                             | 115               | 4.62E-03 |

## Supplementary Table S4

| GO ID | GO Description                                                        | Genes Present | FDR      |
|-------|-----------------------------------------------------------------------|---------------|----------|
| 5996  | monosaccharide metabolic process                                      | 2             | 3.45E-02 |
| 6139  | nucleobase, nucleoside, nucleotide and nucleic acid metabolic process | 29            | 1.22E-09 |
| 6396  | RNA processing                                                        | 5             | 2.98E-05 |
| 6412  | translation                                                           | 5             | 2.47E-03 |
| 6511  | ubiquitin-dependent protein catabolic process                         | 2             | 1.36E-03 |
| 6732  | coenzyme metabolic process                                            | 2             | 1.86E-02 |
| 6807  | nitrogen compound metabolic process                                   | 52            | 5.93E-08 |
| 6810  | transport                                                             | 51            | 1.85E-02 |
| 6996  | organelle organization                                                | 26            | 1.05E-02 |
| 8104  | protein localization                                                  | 12            | 2.31E-03 |
| 8152  | metabolic process                                                     | 296           | 9.87E-05 |
| 9058  | biosynthetic process                                                  | 72            | 5.33E-03 |
| 9059  | macromolecule biosynthetic process                                    | 28            | 5.44E-03 |
| 9451  | RNA modification                                                      | 1             | 8.80E-04 |
| 9987  | cellular process                                                      | 382           | 1.74E-04 |
| 10467 | gene expression                                                       | 17            | 2.21E-08 |
| 15031 | protein transport                                                     | 10            | 1.57E-03 |
| 16070 | RNA metabolic process                                                 | 14            | 1.69E-07 |
| 16071 | mRNA metabolic process                                                | 5             | 2.13E-02 |
| 16192 | vesicle-mediated transport                                            | 5             | 2.66E-02 |
| 19941 | modification-dependent protein catabolic process                      | 2             | 1.16E-03 |
| 22613 | ribonucleoprotein complex biogenesis                                  | 1             | 1.64E-03 |
| 33036 | macromolecule localization                                            | 20            | 2.32E-02 |
| 34641 | cellular nitrogen compound metabolic process                          | 46            | 7.27E-09 |
| 34645 | cellular macromolecule biosynthetic process                           | 28            | 5.68E-03 |
| 34660 | ncRNA metabolic process                                               | 0             | 6.88E-04 |
| 42254 | ribosome biogenesis                                                   | 0             | 1.75E-03 |
| 43170 | macromolecule metabolic process                                       | 153           | 1.36E-05 |
| 43412 | macromolecule modification                                            | 72            | 2.48E-02 |
| 43632 | modification-dependent macromolecule catabolic process                | 2             | 8.38E-04 |
| 44237 | cellular metabolic process                                            | 212           | 1.84E-10 |
| 44238 | primary metabolic process                                             | 232           | 6.39E-05 |
| 44249 | cellular biosynthetic process                                         | 67            | 2.31E-03 |
| 44257 | cellular protein catabolic process                                    | 5             | 4.37E-03 |
| 44260 | cellular macromolecule metabolic process                              | 124           | 2.98E-09 |
| 44262 | cellular carbohydrate metabolic process                               | 16            | 2.26E-02 |
| 44265 | cellular macromolecule catabolic process                              | 5             | 1.42E-04 |
| 44267 | cellular protein metabolic process                                    | 91            | 5.96E-03 |

|       |                                                            |    |          |
|-------|------------------------------------------------------------|----|----------|
| 45184 | establishment of protein localization                      | 10 | 1.36E-03 |
| 46907 | intracellular transport                                    | 12 | 8.40E-03 |
| 51179 | localization                                               | 54 | 1.74E-02 |
| 51186 | cofactor metabolic process                                 | 4  | 7.41E-03 |
| 51234 | establishment of localization                              | 52 | 1.87E-02 |
| 51603 | proteolysis involved in cellular protein catabolic process | 5  | 4.98E-03 |
| 51641 | cellular localization                                      | 13 | 1.21E-03 |
| 51649 | establishment of localization in cell                      | 13 | 5.44E-03 |
| 90304 | nucleic acid metabolic process                             | 24 | 2.83E-08 |

---
