# Supplementary material for: Integrative genomics reveals paths to sex dimorphism in Salix purpurea L
Source: PubMed Central journal article supplement (PMC8325687; doi:10.1038/s41438-021-00606-y), 2021-08-01
Supplement: 41438_2021_606_MOESM4_ESM.pdf [file 41438_2021_606_MOESM4_ESM.pdf]

| Name          | Chr    | Start    | end      | Length | Reads  | Unique Reads | Major RNA                 | Major RNA Reads | Dicer Call | <20  |
|---------------|--------|----------|----------|--------|--------|--------------|---------------------------|-----------------|------------|------|
| Spu-miR12420  | Chr01  | 5390167  | 5390252  | 86     | 19     | 18           | UUUUGAAAAAGAUUUGGGCUAAGC  | 12              | 24         | 0    |
| Spu-miR167a   | Chr02  | 2546206  | 2546454  | 249    | 21948  | 984          | UGAAGCUGCCAGCAUGAUCUG     | 14491           | 21         | 108  |
| Spu-miR12421  | Chr02  | 6755707  | 6755829  | 123    | 925    | 683          | UGAAACGCAGUGCCAAGCAAGCAUA | 480             | 25         | 5    |
| Spu-miR171a   | Chr04  | 476403   | 476580   | 178    | 1111   | 15           | AGAUUUGGUACGGUUCAAUC      | 829             | 21         | 21   |
| Spu-miR399a   | Chr04  | 3155960  | 3156093  | 134    | 52     | 11           | UGCCAAGGAGAUUUGCCUG       | 39              | 21         | 0    |
| Spu-miR399b   | Chr04  | 3158638  | 3158815  | 178    | 762    | 109          | UGCCAAGGAGAUUUGCCUG       | 381             | 21         | 1    |
| Spu-miR3627a  | Chr04  | 9319512  | 9319746  | 235    | 21626  | 21626        | UUGUCGCAGGAGCGGUGGCACC    | 13074           | 22         | 7    |
| Spu-miR395a   | Chr04  | 15610953 | 15611114 | 162    | 419    | 18           | CUGAAGUGUUUGGGGAACUC      | 287             | 21         | 19   |
| Spu-miR395b   | Chr04  | 15612449 | 15612536 | 88     | 88     | 1            | CUGAAGUGUUUGGGGAACUC      | 17              | 21         | 7    |
| Spu-miR395c   | Chr04  | 15628880 | 15629146 | 267    | 307    | 26           | CUGAAGUGUUUGGGGAACUC      | 62              | 21         | 35   |
| Spu-miR167b   | Chr05  | 2940103  | 2940284  | 182    | 75585  | 3130         | UGAAGCUGCCAGCAUGAUCUG     | 45693           | 21         | 255  |
| Spu-miR166a   | Chr05  | 3924142  | 3924378  | 237    | 3091   | 17           | UCGGACCAGGCUUCAUCCCC      | 2575            | 21         | 23   |
| Spu-miR167c   | Chr05  | 15569344 | 15569484 | 141    | 3368   | 118          | UGAAGCUGCCAGCAUGAUCUG     | 1694            | 21         | 11   |
| Spu-miR171b   | Chr06  | 3831004  | 3831090  | 87     | 86     | 0            | CGAUGUUGGUGAGGUUCAUC      | 65              | 21         | 0    |
| Spu-miR171c   | Chr06  | 3835891  | 3836056  | 166    | 90     | 0            | CGAUGUUGGUGAGGUUCAUC      | 69              | 21         | 0    |
| Spu-miR12422  | Chr06  | 4882875  | 4883149  | 275    | 6720   | 637          | UCGGUUUUUCUAUUGUUCGGAAC   | 3336            | 24         | 55   |
| Spu-miR2111   | Chr06  | 5427587  | 5427760  | 174    | 465    | 454          | CUAGGCCUUGGGUUCAGAUUACC   | 325             | 24         | 3    |
| Spu-miR390a   | Chr06  | 6180906  | 6181056  | 151    | 26     | 3            | AAGCUCAGGAGGAUAGCGCC      | 10              | 21         | 0    |
| Spu-miR164a   | Chr06  | 6317292  | 6317530  | 239    | 1413   | 248          | UGGAGAAGCAGGCACGUGCA      | 595             | 21         | 21   |
| Spu-miR156a   | Chr06  | 13846849 | 13846964 | 116    | 461    | 79           | UGACAGAAGAGAGUGAGCACU     | 108             | 21         | 3    |
| Spu-miR156b   | Chr06  | 19006933 | 19007076 | 144    | 230    | 27           | UGACAGAAGAGAGUGAGCAC      | 46              | 21         | 0    |
| Spu-miR403    | Chr08  | 5423300  | 5423499  | 200    | 40893  | 879          | UUAGAUUCACGCACAAACUCG     | 37892           | 21         | 124  |
| Spu-miR167d   | Chr08  | 8894197  | 8894487  | 291    | 9450   | 264          | UGAAGCUGCCAGCAUGAUCUG     | 3784            | 21         | 47   |
| Spu-miR166b   | Chr08  | 9245708  | 9245886  | 179    | 607471 | 320          | UCUCGGACCAGGCUUCAUCC      | 393394          | 21         | 1953 |
| Spu-miR12423  | Chr08  | 12743624 | 12743755 | 132    | 70     | 66           | UCAGAAGGAUUAUUGAAGAAC     | 23              | 21         | 1    |
| Spu-miR172a   | Chr09  | 2892935  | 2893114  | 180    | 619    | 350          | GCGGCAGCAUCAAGAUUCACA     | 246             | 21         | 19   |
| Spu-miR390b   | Chr09  | 5612879  | 5613152  | 274    | 103394 | 14952        | AAGCUCAGGAGGAUAGCGCC      | 57097           | 21         | 1269 |
| Spu-miR403a   | Chr10  | 10076881 | 10077088 | 208    | 63298  | 1362         | UUAGAUUCACGCACAAACUCG     | 59000           | 21         | 163  |
| Spu-miR156c   | Chr12  | 3197390  | 3197490  | 101    | 1667   | 23           | GCUCUCUAAAGCUUCUGUCAUC    | 898             | 21         | 18   |
| Spu-miR171c   | Chr12  | 8351984  | 8352111  | 128    | 319    | 35           | UUGAGCCGUGCCAAUUCACG      | 221             | 21         | 3    |
| Spu-miR399    | Chr12  | 10545966 | 10546254 | 289    | 2299   | 291          | UGCCAAGGAGAUUUGCCUG       | 1070            | 21         | 10   |
| Spu-miR393    | Chr12  | 10816595 | 10816773 | 179    | 51462  | 24           | UCCAAGGGAUCGCAUUGAUUU     | 43394           | 22         | 12   |
| Spu-miR164    | Chr13  | 842171   | 842291   | 121    | 532    | 72           | UGGAGAAGCAGGCACGUGCA      | 170             | 21         | 5    |
| Spu-miR319    | Chr13  | 14611610 | 14611886 | 277    | 68220  | 427          | UUGGACUGAAGGGAGCUCCC      | 26312           | 21         | 389  |
| Spu-miR162    | Chr15W | 6070157  | 6070284  | 128    | 15830  | 394          | UCGAUAAACCUUGCAUCCAG      | 8010            | 21         | 1356 |
| Spu-miR6445   | Chr15W | 9647264  | 9647437  | 174    | 3229   | 0            | AUUUUAGGAAGGGAUGAAUA      | 1079            | 21         | 31   |
| Spu-miR1446-1 | Chr15W | 13324567 | 13324662 | 96     | 933    | 0            | UUCUGAACUCUCUCCUCAAC      | 378             | 21         | 3    |
| Spu-miR156d   | Chr15Z | 5200310  | 5200523  | 214    | 2821   | 38           | GCUCUCUAAAGCUUCUGUCAUC    | 1487            | 21         | 30   |
| Spu-miR1446-2 | Chr15Z | 10970968 | 10971061 | 94     | 972    | 0            | UUCUGAACUCUCUCCUCAAC      | 346             | 21         | 5    |
| Spu-miR160a   | Chr16  | 80655    | 80741    | 87     | 19     | 9            | UGCCUGGCUCCUGUAUGCCA      | 8               | 21         | 1    |
| Spu-miR395d   | Chr16  | 11568408 | 11568564 | 157    | 502    | 21           | CUGAAGUGUUUGGGGAACUC      | 347             | 21         | 19   |
| Spu-miR12424  | Chr16  | 13458436 | 13458691 | 256    | 53     | 50           | UGUUUUAAUGGAUUGCAGAUG     | 30              | 21         | 1    |
| Spu-miR172b   | Chr16  | 15596694 | 15596955 | 262    | 35     | 16           | GCGGCAUCAUCACGAUUCACA     | 9               | 21         | 3    |
| Spu-miR160b   | Chr16  | 30160705 | 30160920 | 216    | 149    | 56           | UGCCUGGCUCCUGUAUGCCA      | 59              | 21         | 1    |
| Spu-miR396    | Chr18  | 10287527 | 10287770 | 244    | 6542   | 44           | GUUCAAAAGCUGUGGGAAG       | 2290            | 21         | 233  |

| 20    | 21     | 22    | 23   | 24    | 25  | >25 | PmiREN match |
|-------|--------|-------|------|-------|-----|-----|--------------|
| 0     | 0      | 0     | 1    | 18    | 0   | 0   | -            |
| 213   | 16062  | 5077  | 118  | 84    | 13  | 273 | Ptr-miR167a  |
| 3     | 12     | 21    | 23   | 239   | 570 | 52  | -            |
| 9     | 969    | 81    | 6    | 16    | 0   | 9   | Ptr-miR171i  |
| 0     | 49     | 1     | 0    | 1     | 0   | 1   | Ath-miR399a  |
| 4     | 680    | 4     | 22   | 50    | 0   | 1   | Ath-miR399a  |
| 6     | 250    | 13344 | 266  | 7497  | 203 | 53  | Mes-miR3627  |
| 69    | 318    | 8     | 2    | 2     | 0   | 1   | Ptr-miR395a  |
| 22    | 54     | 0     | 0    | 3     | 0   | 2   | Ptr-miR395a  |
| 66    | 171    | 2     | 5    | 4     | 0   | 24  | Ptr-miR395a  |
| 2232  | 50174  | 21483 | 316  | 999   | 90  | 36  | Ptr-miR167a  |
| 17    | 2860   | 125   | 56   | 8     | 0   | 2   | Ptr-miR166a  |
| 52    | 2378   | 793   | 26   | 64    | 15  | 29  | Ptr-miR167a  |
| 1     | 72     | 2     | 8    | 3     | 0   | 0   | Gma-miR171l  |
| 1     | 75     | 7     | 4    | 1     | 1   | 1   | Gma-miR171l  |
| 68    | 289    | 91    | 183  | 5465  | 313 | 256 | -            |
| 1     | 45     | 5     | 9    | 392   | 7   | 3   | Ptr-MIR2111a |
| 0     | 19     | 3     | 0    | 0     | 3   | 1   | Ptr-miR390a  |
| 48    | 1050   | 76    | 23   | 87    | 91  | 17  | Ptr-miR164a  |
| 110   | 267    | 66    | 4    | 1     | 0   | 10  | Mac-miR156f  |
| 48    | 97     | 55    | 7    | 10    | 2   | 11  | Ptr-miR156a  |
| 115   | 39323  | 1162  | 23   | 135   | 1   | 10  | Ptr-miR403a  |
| 141   | 5340   | 1362  | 130  | 2241  | 115 | 74  | Ptr-miR167a  |
| 1883  | 590965 | 3739  | 2086 | 6767  | 36  | 42  | Ptr-miR166o  |
| 4     | 31     | 8     | 4    | 9     | 11  | 2   | -            |
| 89    | 485    | 20    | 2    | 2     | 0   | 2   | Ptr-miR172a  |
| 6244  | 73429  | 5565  | 2390 | 13743 | 243 | 511 | Ptr-miR390a  |
| 199   | 60792  | 1699  | 97   | 75    | 22  | 251 | Ptr-miR403a  |
| 9     | 1397   | 215   | 23   | 5     | 0   | 0   | Aco-miR156m  |
| 7     | 296    | 11    | 2    | 0     | 0   | 0   | Ath-miR171b  |
| 24    | 2026   | 195   | 11   | 18    | 1   | 14  | Ath-miR399a  |
| 36    | 1357   | 48716 | 1307 | 22    | 2   | 10  | Aof-miR393a  |
| 9     | 433    | 30    | 5    | 40    | 4   | 6   | Ptr-miR164a  |
| 28383 | 28476  | 9328  | 976  | 515   | 83  | 70  | Ath-miR1319a |
| 2486  | 11154  | 358   | 148  | 23    | 72  | 233 | Ptr-miR162a  |
| 111   | 1154   | 578   | 518  | 174   | 74  | 589 | Ptr-miR6445a |
| 52    | 617    | 237   | 10   | 6     | 3   | 5   | Ptr-miR1446a |
| 22    | 2271   | 411   | 32   | 3     | 6   | 46  | Aco-miR156m  |
| 55    | 579    | 303   | 12   | 11    | 1   | 6   | Ptr-miR1446a |
| 2     | 15     | 1     | 0    | 0     | 0   | 0   | Ptr-miR160a  |
| 94    | 366    | 5     | 3    | 14    | 0   | 1   | Ptr-miR395a  |
| 2     | 38     | 2     | 1    | 0     | 1   | 8   | -            |
| 3     | 25     | 1     | 0    | 2     | 0   | 1   | Ptr-miR172a  |
| 16    | 91     | 23    | 2    | 0     | 1   | 15  | Ptr-miR160a  |
| 500   | 5672   | 91    | 7    | 7     | 9   | 23  | Mac-miR396t  |
