# Supplementary material for: Integrative genomics reveals paths to sex dimorphism in Salix purpurea L
Source: PubMed Central journal article supplement (PMC8325687; doi:10.1038/s41438-021-00606-y), 2021-08-01
Supplement: 41438_2021_606_MOESM5_ESM.pdf [file 41438_2021_606_MOESM5_ESM.pdf]

| Chr   | start    | end      | CpG sites | Male mean proportionMethylated | Female mean proportion Methylated | Female:Male difference | FDR       |
|-------|----------|----------|-----------|--------------------------------|-----------------------------------|------------------------|-----------|
| Chr01 | 333391   | 333878   | 145       | 4.905E-01                      | 3.519E-01                         | -1.386E-01             | 7.448E-03 |
| Chr01 | 546756   | 547250   | 186       | 1.733E-01                      | 6.072E-02                         | -1.126E-01             | 1.283E-02 |
| Chr01 | 547253   | 547747   | 192       | 1.602E-01                      | 4.433E-02                         | -1.158E-01             | 4.971E-02 |
| Chr01 | 628596   | 629090   | 131       | 3.462E-01                      | 1.826E-01                         | -1.636E-01             | 1.174E-02 |
| Chr01 | 738998   | 739492   | 192       | 2.378E-01                      | 1.199E-01                         | -1.179E-01             | 7.000E-07 |
| Chr01 | 897952   | 898349   | 121       | 4.406E-01                      | 3.367E-01                         | -1.039E-01             | 6.620E-05 |
| Chr01 | 986492   | 986987   | 175       | 2.582E-01                      | 1.461E-01                         | -1.122E-01             | 3.429E-02 |
| Chr01 | 995163   | 995616   | 141       | 3.865E-01                      | 2.715E-01                         | -1.150E-01             | 1.700E-06 |
| Chr01 | 1508072  | 1508570  | 216       | 2.874E-01                      | 1.168E-01                         | -1.706E-01             | 1.237E-02 |
| Chr01 | 1682772  | 1683270  | 102       | 2.685E-01                      | 1.664E-01                         | -1.020E-01             | 4.116E-04 |
| Chr01 | 2273380  | 2273868  | 104       | 3.216E-01                      | 2.019E-01                         | -1.196E-01             | 5.634E-03 |
| Chr01 | 2406795  | 2407197  | 94        | 3.384E-01                      | 4.860E-01                         | 1.476E-01              | 2.859E-04 |
| Chr01 | 2428135  | 2428597  | 57        | 3.871E-01                      | 1.564E-01                         | -2.307E-01             | 3.920E-05 |
| Chr01 | 2440908  | 2441398  | 177       | 4.122E-01                      | 3.019E-01                         | -1.103E-01             | 1.777E-04 |
| Chr01 | 2587558  | 2588042  | 145       | 4.207E-01                      | 3.186E-01                         | -1.022E-01             | 0.000E+00 |
| Chr01 | 2605581  | 2606049  | 138       | 2.078E-01                      | 3.277E-01                         | 1.199E-01              | 2.300E-03 |
| Chr01 | 2882193  | 2882682  | 163       | 3.066E-01                      | 1.966E-01                         | -1.100E-01             | 3.610E-03 |
| Chr01 | 3247955  | 3248442  | 95        | 4.531E-01                      | 3.448E-01                         | -1.083E-01             | 1.523E-03 |
| Chr01 | 4170359  | 4170846  | 137       | 4.430E-01                      | 2.782E-01                         | -1.648E-01             | 1.532E-03 |
| Chr01 | 4294428  | 4294914  | 92        | 4.056E-01                      | 9.008E-02                         | -3.156E-01             | 0.000E+00 |
| Chr01 | 5635995  | 5636487  | 186       | 4.122E-01                      | 2.657E-01                         | -1.465E-01             | 1.600E-02 |
| Chr01 | 6226505  | 6226992  | 92        | 4.168E-01                      | 2.891E-01                         | -1.277E-01             | 5.939E-04 |
| Chr01 | 6623254  | 6623745  | 135       | 3.071E-01                      | 1.872E-01                         | -1.199E-01             | 2.720E-03 |
| Chr01 | 6826225  | 6826436  | 46        | 3.608E-01                      | 2.559E-01                         | -1.049E-01             | 8.340E-05 |
| Chr01 | 7658488  | 7658980  | 167       | 2.743E-01                      | 1.674E-01                         | -1.069E-01             | 3.013E-03 |
| Chr01 | 7667484  | 7667978  | 181       | 3.630E-01                      | 2.587E-01                         | -1.043E-01             | 8.311E-03 |
| Chr01 | 7808245  | 7808320  | 19        | 2.149E-01                      | 3.841E-01                         | 1.692E-01              | 2.865E-02 |
| Chr01 | 7936275  | 7936697  | 82        | 5.330E-01                      | 4.032E-01                         | -1.298E-01             | 7.392E-03 |
| Chr01 | 8119255  | 8119518  | 55        | 3.642E-01                      | 2.640E-01                         | -1.002E-01             | 3.542E-02 |
| Chr01 | 8193877  | 8193984  | 27        | 2.592E-01                      | 1.479E-01                         | -1.113E-01             | 2.364E-02 |
| Chr01 | 8336829  | 8337112  | 46        | 2.865E-01                      | 1.476E-01                         | -1.389E-01             | 6.000E-07 |
| Chr01 | 9557519  | 9558002  | 197       | 2.809E-01                      | 1.656E-01                         | -1.153E-01             | 2.816E-02 |
| Chr01 | 10281475 | 10281565 | 16        | 3.519E-01                      | 1.634E-01                         | -1.885E-01             | 6.037E-03 |
| Chr01 | 10285544 | 10285647 | 22        | 3.810E-01                      | 1.908E-01                         | -1.902E-01             | 4.286E-04 |
| Chr01 | 10596878 | 10597351 | 180       | 4.436E-01                      | 2.940E-01                         | -1.497E-01             | 2.000E-07 |
| Chr01 | 11166065 | 11166170 | 31        | 2.599E-01                      | 3.652E-01                         | 1.053E-01              | 1.856E-02 |
| Chr01 | 11828893 | 11829374 | 178       | 2.864E-01                      | 1.688E-01                         | -1.176E-01             | 0.000E+00 |
| Chr01 | 12065468 | 12065956 | 55        | 2.721E-01                      | 1.247E-01                         | -1.473E-01             | 1.402E-03 |
| Chr01 | 12179721 | 12180215 | 135       | 2.635E-01                      | 1.491E-01                         | -1.144E-01             | 2.947E-03 |
| Chr01 | 12329407 | 12329903 | 136       | 4.554E-01                      | 2.952E-01                         | -1.601E-01             | 8.900E-05 |
| Chr01 | 12341360 | 12341857 | 143       | 2.923E-01                      | 1.756E-01                         | -1.166E-01             | 4.539E-04 |
| Chr01 | 12408809 | 12409282 | 156       | 3.699E-01                      | 2.513E-01                         | -1.186E-01             | 1.001E-04 |
| Chr01 | 12943412 | 12943910 | 111       | 6.833E-02                      | 2.588E-01                         | 1.905E-01              | 3.540E-05 |
| Chr01 | 12968075 | 12968178 | 18        | 3.978E-01                      | 2.308E-01                         | -1.670E-01             | 3.252E-03 |

|       |          |          |     |           |           |            |           |
|-------|----------|----------|-----|-----------|-----------|------------|-----------|
| Chr01 | 12970953 | 12971437 | 77  | 3.036E-01 | 2.024E-01 | -1.012E-01 | 4.475E-02 |
| Chr01 | 13020827 | 13020999 | 36  | 3.699E-01 | 2.487E-01 | -1.212E-01 | 4.598E-03 |
| Chr01 | 13519246 | 13519729 | 140 | 3.153E-01 | 2.072E-01 | -1.081E-01 | 6.419E-04 |
| Chr01 | 13657779 | 13658272 | 162 | 4.560E-01 | 2.719E-01 | -1.840E-01 | 9.450E-05 |
| Chr01 | 13746071 | 13746540 | 134 | 2.704E-01 | 1.627E-01 | -1.077E-01 | 1.000E-07 |
| Chr01 | 14015455 | 14015946 | 183 | 2.546E-01 | 1.378E-01 | -1.168E-01 | 1.450E-05 |
| Chr01 | 14027423 | 14027902 | 130 | 3.735E-01 | 2.623E-01 | -1.112E-01 | 4.389E-04 |
| Chr01 | 14079323 | 14079448 | 23  | 1.878E-01 | 1.075E-03 | -1.867E-01 | 3.730E-05 |
| Chr01 | 14254957 | 14255454 | 144 | 2.298E-01 | 3.742E-01 | 1.444E-01  | 3.389E-02 |
| Chr01 | 14523973 | 14524460 | 115 | 4.531E-01 | 3.467E-01 | -1.065E-01 | 1.202E-02 |
| Chr01 | 14539769 | 14540260 | 141 | 1.924E-01 | 5.285E-02 | -1.395E-01 | 3.040E-03 |
| Chr01 | 14569693 | 14570186 | 144 | 3.400E-01 | 2.215E-01 | -1.185E-01 | 2.276E-04 |
| Chr01 | 14756093 | 14756590 | 195 | 1.712E-01 | 5.779E-02 | -1.134E-01 | 4.729E-02 |
| Chr01 | 14852174 | 14852668 | 145 | 2.508E-01 | 1.436E-01 | -1.072E-01 | 2.298E-03 |
| Chr01 | 14852675 | 14853159 | 199 | 3.045E-01 | 1.128E-02 | -2.932E-01 | 0.000E+00 |
| Chr01 | 14853165 | 14853660 | 95  | 2.644E-01 | 9.064E-02 | -1.737E-01 | 3.358E-03 |
| Chr01 | 15321869 | 15322367 | 106 | 2.874E-01 | 1.403E-01 | -1.471E-01 | 1.758E-03 |
| Chr02 | 107586   | 108071   | 137 | 3.589E-01 | 2.460E-01 | -1.129E-01 | 7.894E-03 |
| Chr02 | 111564   | 112061   | 220 | 2.386E-01 | 3.463E-01 | 1.076E-01  | 1.682E-02 |
| Chr02 | 1237103  | 1237600  | 169 | 3.369E-01 | 2.170E-01 | -1.199E-01 | 1.270E-05 |
| Chr02 | 1383784  | 1384238  | 56  | 2.213E-01 | 1.056E-01 | -1.157E-01 | 4.100E-05 |
| Chr02 | 1416100  | 1416578  | 119 | 1.918E-01 | 4.860E-02 | -1.432E-01 | 4.370E-03 |
| Chr02 | 1692612  | 1693105  | 149 | 2.450E-01 | 1.420E-01 | -1.030E-01 | 5.000E-07 |
| Chr02 | 2652868  | 2653238  | 107 | 3.265E-01 | 2.256E-01 | -1.009E-01 | 1.027E-03 |
| Chr02 | 3324004  | 3324491  | 156 | 2.605E-01 | 1.531E-01 | -1.074E-01 | 2.000E-07 |
| Chr02 | 3593627  | 3594122  | 162 | 3.667E-01 | 2.601E-01 | -1.066E-01 | 3.040E-05 |
| Chr02 | 4130394  | 4130889  | 177 | 5.702E-01 | 4.530E-01 | -1.172E-01 | 7.715E-03 |
| Chr02 | 4532860  | 4533109  | 57  | 4.088E-01 | 3.037E-01 | -1.051E-01 | 4.395E-03 |
| Chr02 | 4593978  | 4594469  | 140 | 4.952E-01 | 3.596E-01 | -1.356E-01 | 0.000E+00 |
| Chr02 | 5030553  | 5031043  | 95  | 1.661E-01 | 4.206E-01 | 2.545E-01  | 8.541E-03 |
| Chr02 | 5075260  | 5075758  | 113 | 5.215E-01 | 3.980E-01 | -1.235E-01 | 7.370E-05 |
| Chr02 | 5078738  | 5079215  | 79  | 3.988E-01 | 2.574E-01 | -1.415E-01 | 4.000E-07 |
| Chr02 | 6054021  | 6054517  | 159 | 2.598E-01 | 9.430E-02 | -1.655E-01 | 1.400E-06 |
| Chr02 | 6124786  | 6125278  | 181 | 4.208E-01 | 3.096E-01 | -1.112E-01 | 1.800E-06 |
| Chr02 | 6627936  | 6628424  | 108 | 5.677E-01 | 4.638E-01 | -1.040E-01 | 1.640E-05 |
| Chr02 | 6809825  | 6810310  | 152 | 4.132E-01 | 3.015E-01 | -1.117E-01 | 4.277E-03 |
| Chr02 | 6911569  | 6912044  | 90  | 5.235E-01 | 3.398E-01 | -1.837E-01 | 1.907E-03 |
| Chr02 | 6912649  | 6913145  | 172 | 2.705E-01 | 1.192E-01 | -1.513E-01 | 1.653E-02 |
| Chr02 | 7450260  | 7450380  | 19  | 3.025E-01 | 1.110E-01 | -1.915E-01 | 2.603E-03 |
| Chr02 | 7683016  | 7683329  | 52  | 4.630E-01 | 3.500E-01 | -1.129E-01 | 4.492E-04 |
| Chr02 | 8108002  | 8108488  | 141 | 3.383E-01 | 2.317E-01 | -1.065E-01 | 1.060E-05 |
| Chr02 | 8417566  | 8418053  | 129 | 4.610E-01 | 2.836E-01 | -1.774E-01 | 7.200E-05 |
| Chr02 | 8783327  | 8783463  | 32  | 3.405E-01 | 1.609E-01 | -1.796E-01 | 2.521E-02 |
| Chr02 | 8808225  | 8808722  | 188 | 3.611E-01 | 2.596E-01 | -1.016E-01 | 3.070E-05 |
| Chr02 | 9130466  | 9130947  | 74  | 3.374E-01 | 2.223E-01 | -1.151E-01 | 1.000E-07 |
| Chr02 | 9322694  | 9323170  | 162 | 4.524E-01 | 3.468E-01 | -1.056E-01 | 2.380E-03 |
| Chr02 | 9523130  | 9523628  | 150 | 3.140E-01 | 1.650E-01 | -1.490E-01 | 1.776E-02 |

|       |          |          |     |           |           |            |           |
|-------|----------|----------|-----|-----------|-----------|------------|-----------|
| Chr02 | 12593924 | 12594418 | 166 | 3.926E-01 | 2.881E-01 | -1.045E-01 | 1.842E-04 |
| Chr02 | 12685498 | 12685836 | 45  | 4.387E-01 | 3.157E-01 | -1.230E-01 | 1.263E-02 |
| Chr02 | 12802658 | 12802924 | 89  | 2.953E-01 | 1.479E-01 | -1.474E-01 | 5.300E-06 |
| Chr02 | 13166834 | 13167297 | 146 | 7.638E-02 | 1.784E-01 | 1.021E-01  | 1.845E-02 |
| Chr02 | 13383471 | 13383967 | 207 | 3.979E-01 | 2.924E-01 | -1.055E-01 | 8.947E-03 |
| Chr02 | 14781116 | 14781394 | 32  | 3.868E-01 | 2.593E-01 | -1.275E-01 | 8.681E-03 |
| Chr02 | 15176288 | 15176785 | 123 | 2.529E-01 | 1.335E-01 | -1.194E-01 | 2.093E-04 |
| Chr02 | 16103877 | 16104368 | 131 | 3.178E-01 | 2.160E-01 | -1.018E-01 | 3.993E-03 |
| Chr02 | 16768410 | 16768590 | 32  | 3.221E-01 | 2.057E-01 | -1.164E-01 | 3.333E-03 |
| Chr03 | 337382   | 337817   | 119 | 1.980E-01 | 9.387E-02 | -1.041E-01 | 3.564E-02 |
| Chr03 | 430350   | 430803   | 79  | 3.785E-01 | 2.399E-01 | -1.386E-01 | 3.013E-02 |
| Chr03 | 436131   | 436555   | 42  | 3.711E-01 | 1.997E-01 | -1.714E-01 | 3.100E-06 |
| Chr03 | 439674   | 440088   | 90  | 4.256E-01 | 3.002E-01 | -1.254E-01 | 8.914E-03 |
| Chr03 | 454546   | 455014   | 102 | 9.558E-02 | 2.950E-01 | 1.994E-01  | 3.514E-04 |
| Chr03 | 786090   | 786582   | 209 | 2.923E-01 | 1.800E-01 | -1.123E-01 | 1.641E-02 |
| Chr03 | 791774   | 792235   | 94  | 4.725E-01 | 3.629E-01 | -1.096E-01 | 1.307E-02 |
| Chr03 | 989910   | 990401   | 127 | 1.992E-01 | 7.293E-02 | -1.263E-01 | 8.420E-04 |
| Chr03 | 999294   | 999706   | 65  | 2.861E-01 | 5.409E-02 | -2.320E-01 | 0.000E+00 |
| Chr03 | 1014842  | 1015338  | 138 | 1.961E-01 | 5.345E-02 | -1.426E-01 | 2.948E-02 |
| Chr03 | 1119564  | 1120060  | 140 | 3.632E-01 | 2.544E-01 | -1.088E-01 | 4.105E-02 |
| Chr03 | 1430549  | 1431025  | 110 | 3.810E-01 | 2.701E-01 | -1.109E-01 | 3.353E-04 |
| Chr03 | 1438028  | 1438518  | 165 | 3.021E-01 | 1.999E-01 | -1.021E-01 | 2.291E-03 |
| Chr03 | 1947061  | 1947549  | 100 | 5.538E-01 | 4.311E-01 | -1.227E-01 | 0.000E+00 |
| Chr03 | 2681350  | 2681844  | 160 | 3.146E-01 | 1.900E-01 | -1.246E-01 | 5.450E-05 |
| Chr03 | 3485226  | 3485722  | 61  | 4.815E-01 | 2.159E-01 | -2.655E-01 | 3.025E-03 |
| Chr03 | 4917288  | 4917732  | 162 | 4.574E-01 | 3.489E-01 | -1.086E-01 | 6.000E-07 |
| Chr03 | 5178862  | 5179173  | 58  | 4.124E-01 | 2.797E-01 | -1.327E-01 | 5.200E-05 |
| Chr03 | 5207646  | 5207920  | 40  | 3.582E-01 | 1.545E-01 | -2.036E-01 | 1.500E-06 |
| Chr03 | 5663825  | 5664318  | 155 | 3.714E-01 | 2.618E-01 | -1.096E-01 | 3.348E-04 |
| Chr03 | 5771164  | 5771462  | 30  | 6.429E-01 | 4.082E-01 | -2.347E-01 | 6.424E-04 |
| Chr03 | 5793134  | 5793557  | 62  | 4.700E-02 | 1.827E-01 | 1.357E-01  | 0.000E+00 |
| Chr03 | 5842006  | 5842479  | 123 | 4.056E-01 | 2.927E-01 | -1.129E-01 | 7.582E-03 |
| Chr03 | 6363018  | 6363507  | 196 | 2.557E-01 | 1.373E-01 | -1.185E-01 | 1.072E-04 |
| Chr03 | 7021543  | 7022034  | 126 | 3.308E-01 | 1.803E-01 | -1.505E-01 | 3.000E-07 |
| Chr03 | 7617502  | 7617994  | 95  | 3.051E-01 | 1.525E-01 | -1.526E-01 | 2.504E-03 |
| Chr03 | 7703595  | 7704080  | 203 | 3.047E-01 | 1.756E-01 | -1.291E-01 | 2.842E-03 |
| Chr03 | 8941410  | 8941902  | 171 | 3.959E-01 | 2.935E-01 | -1.024E-01 | 0.000E+00 |
| Chr03 | 9516251  | 9516738  | 152 | 5.723E-01 | 4.288E-01 | -1.435E-01 | 3.173E-03 |
| Chr03 | 10016713 | 10017002 | 53  | 1.235E-01 | 1.632E-02 | -1.072E-01 | 8.165E-03 |
| Chr03 | 10025173 | 10025351 | 27  | 2.507E-01 | 3.532E-01 | 1.025E-01  | 4.101E-02 |
| Chr03 | 10330707 | 10331199 | 146 | 9.417E-02 | 2.030E-01 | 1.089E-01  | 3.867E-03 |
| Chr03 | 10531563 | 10532050 | 187 | 2.306E-01 | 9.854E-02 | -1.321E-01 | 1.305E-02 |
| Chr03 | 10655115 | 10655600 | 143 | 4.715E-01 | 3.385E-01 | -1.330E-01 | 6.375E-04 |
| Chr03 | 12326408 | 12326903 | 189 | 2.960E-01 | 1.743E-01 | -1.217E-01 | 3.107E-03 |
| Chr03 | 12735238 | 12735727 | 178 | 3.146E-01 | 2.028E-01 | -1.118E-01 | 9.115E-04 |
| Chr03 | 12761697 | 12762193 | 203 | 3.152E-01 | 2.098E-01 | -1.053E-01 | 6.553E-04 |
| Chr03 | 12873542 | 12874039 | 163 | 3.982E-01 | 2.668E-01 | -1.314E-01 | 4.877E-03 |

|       |          |          |     |           |           |            |           |
|-------|----------|----------|-----|-----------|-----------|------------|-----------|
| Chr03 | 13065585 | 13066082 | 123 | 5.019E-01 | 4.000E-01 | -1.019E-01 | 8.792E-03 |
| Chr03 | 13167073 | 13167570 | 164 | 2.281E-01 | 9.870E-02 | -1.294E-01 | 1.353E-02 |
| Chr03 | 13260564 | 13261059 | 123 | 2.635E-01 | 1.626E-01 | -1.010E-01 | 6.790E-05 |
| Chr03 | 13865365 | 13865827 | 195 | 3.822E-01 | 2.342E-01 | -1.480E-01 | 4.000E-07 |
| Chr04 | 165309   | 165771   | 100 | 4.795E-01 | 3.556E-01 | -1.239E-01 | 1.600E-06 |
| Chr04 | 205600   | 206090   | 193 | 1.200E-01 | 2.738E-01 | 1.538E-01  | 7.131E-03 |
| Chr04 | 368210   | 368701   | 161 | 2.232E-01 | 8.149E-02 | -1.417E-01 | 3.570E-02 |
| Chr04 | 408944   | 409153   | 25  | 4.700E-01 | 3.325E-01 | -1.375E-01 | 1.355E-02 |
| Chr04 | 506929   | 507207   | 45  | 3.334E-01 | 2.225E-01 | -1.109E-01 | 2.526E-02 |
| Chr04 | 549401   | 549872   | 175 | 4.484E-01 | 2.973E-01 | -1.511E-01 | 2.100E-06 |
| Chr04 | 693558   | 693992   | 115 | 4.857E-01 | 3.535E-01 | -1.322E-01 | 1.010E-03 |
| Chr04 | 1617202  | 1617534  | 79  | 5.906E-01 | 4.003E-01 | -1.903E-01 | 4.622E-03 |
| Chr04 | 1732628  | 1733119  | 206 | 3.250E-01 | 2.004E-01 | -1.246E-01 | 0.000E+00 |
| Chr04 | 2634814  | 2635308  | 193 | 4.056E-01 | 3.051E-01 | -1.004E-01 | 4.291E-04 |
| Chr04 | 2888247  | 2888684  | 52  | 3.751E-01 | 2.615E-01 | -1.136E-01 | 2.578E-04 |
| Chr04 | 3609919  | 3610413  | 88  | 3.209E-01 | 2.083E-01 | -1.127E-01 | 4.859E-03 |
| Chr04 | 3713624  | 3714089  | 75  | 5.375E-01 | 3.957E-01 | -1.419E-01 | 1.667E-04 |
| Chr04 | 3767908  | 3768212  | 48  | 3.657E-01 | 2.534E-01 | -1.122E-01 | 1.000E-07 |
| Chr04 | 3770634  | 3771056  | 65  | 1.751E-01 | 3.110E-01 | 1.359E-01  | 2.797E-03 |
| Chr04 | 3938502  | 3938998  | 153 | 3.991E-01 | 2.704E-01 | -1.287E-01 | 7.587E-03 |
| Chr04 | 4484369  | 4484834  | 159 | 2.215E-01 | 1.034E-01 | -1.181E-01 | 1.566E-02 |
| Chr04 | 5114298  | 5114781  | 108 | 4.344E-01 | 3.302E-01 | -1.042E-01 | 1.991E-03 |
| Chr04 | 5491866  | 5492156  | 101 | 2.811E-01 | 1.518E-01 | -1.293E-01 | 1.713E-03 |
| Chr04 | 5637187  | 5637656  | 166 | 2.164E-01 | 7.651E-02 | -1.399E-01 | 1.627E-03 |
| Chr04 | 5830362  | 5830655  | 66  | 4.144E-01 | 2.897E-01 | -1.247E-01 | 5.758E-03 |
| Chr04 | 5979622  | 5979863  | 44  | 3.425E-01 | 2.144E-01 | -1.281E-01 | 1.303E-02 |
| Chr04 | 6074335  | 6074630  | 69  | 5.383E-01 | 2.802E-01 | -2.581E-01 | 3.252E-02 |
| Chr04 | 6081961  | 6082237  | 74  | 3.545E-01 | 1.860E-01 | -1.685E-01 | 2.047E-02 |
| Chr04 | 6085537  | 6085638  | 18  | 5.336E-01 | 3.953E-01 | -1.382E-01 | 4.782E-02 |
| Chr04 | 6234898  | 6235264  | 52  | 3.939E-01 | 2.929E-01 | -1.010E-01 | 1.247E-03 |
| Chr04 | 6348031  | 6348233  | 38  | 3.696E-01 | 1.932E-01 | -1.764E-01 | 2.357E-04 |
| Chr04 | 6768704  | 6769179  | 83  | 3.949E-03 | 1.416E-01 | 1.377E-01  | 4.930E-05 |
| Chr04 | 6816277  | 6816727  | 84  | 3.131E-01 | 1.470E-01 | -1.661E-01 | 1.842E-04 |
| Chr04 | 6878693  | 6879176  | 137 | 1.267E-01 | 2.753E-03 | -1.240E-01 | 1.068E-02 |
| Chr04 | 6955751  | 6956065  | 50  | 2.652E-01 | 1.205E-03 | -2.640E-01 | 0.000E+00 |
| Chr04 | 6987429  | 6987796  | 56  | 2.075E-01 | 2.239E-04 | -2.073E-01 | 0.000E+00 |
| Chr04 | 7092427  | 7092678  | 51  | 1.969E-01 | 7.458E-02 | -1.223E-01 | 3.466E-02 |
| Chr04 | 7999448  | 7999831  | 60  | 4.704E-02 | 1.771E-01 | 1.300E-01  | 1.140E-02 |
| Chr04 | 8039476  | 8039886  | 113 | 4.938E-01 | 3.795E-01 | -1.143E-01 | 2.461E-03 |
| Chr04 | 8068583  | 8068729  | 37  | 1.011E-01 | 2.230E-04 | -1.009E-01 | 2.147E-04 |
| Chr04 | 8069457  | 8069672  | 58  | 2.077E-01 | 5.271E-02 | -1.550E-01 | 6.006E-04 |
| Chr04 | 8155354  | 8155725  | 79  | 1.111E-01 | 2.654E-01 | 1.543E-01  | 9.470E-04 |
| Chr04 | 8279855  | 8280296  | 48  | 4.580E-01 | 7.004E-01 | 2.423E-01  | 2.917E-04 |
| Chr04 | 8549060  | 8549492  | 154 | 5.164E-01 | 4.130E-01 | -1.034E-01 | 2.111E-03 |
| Chr04 | 9450831  | 9451194  | 72  | 3.913E-01 | 5.108E-01 | 1.194E-01  | 2.516E-03 |
| Chr04 | 9650834  | 9651319  | 76  | 4.747E-01 | 3.247E-01 | -1.500E-01 | 5.167E-04 |
| Chr04 | 9652312  | 9652802  | 93  | 2.842E-01 | 1.530E-01 | -1.312E-01 | 3.663E-04 |

|       |          |          |     |           |           |            |           |
|-------|----------|----------|-----|-----------|-----------|------------|-----------|
| Chr04 | 9653303  | 9653784  | 61  | 1.827E-01 | 4.403E-02 | -1.387E-01 | 2.455E-03 |
| Chr04 | 9934125  | 9934604  | 138 | 3.497E-01 | 4.961E-01 | 1.464E-01  | 8.576E-03 |
| Chr04 | 9934612  | 9935089  | 95  | 5.869E-01 | 7.706E-01 | 1.837E-01  | 5.014E-04 |
| Chr04 | 9940897  | 9941372  | 166 | 5.927E-01 | 4.753E-01 | -1.175E-01 | 2.402E-02 |
| Chr04 | 9942824  | 9943306  | 240 | 4.598E-01 | 5.915E-01 | 1.317E-01  | 4.379E-03 |
| Chr04 | 9949791  | 9949964  | 71  | 3.886E-01 | 5.038E-01 | 1.152E-01  | 4.818E-02 |
| Chr04 | 9953410  | 9953857  | 164 | 4.231E-01 | 5.781E-01 | 1.550E-01  | 1.385E-02 |
| Chr04 | 9990354  | 9990799  | 145 | 4.421E-01 | 5.649E-01 | 1.228E-01  | 2.784E-02 |
| Chr04 | 10045567 | 10045946 | 63  | 1.058E-01 | 2.167E-01 | 1.108E-01  | 5.196E-04 |
| Chr04 | 10067103 | 10067442 | 55  | 1.553E-01 | 2.629E-04 | -1.550E-01 | 1.320E-05 |
| Chr04 | 11061778 | 11062257 | 152 | 2.628E-01 | 1.345E-01 | -1.283E-01 | 1.777E-03 |
| Chr04 | 11165538 | 11166033 | 234 | 1.150E-01 | 3.246E-03 | -1.118E-01 | 4.089E-02 |
| Chr04 | 11482149 | 11482643 | 151 | 2.373E-01 | 3.681E-01 | 1.308E-01  | 1.606E-02 |
| Chr04 | 12931778 | 12932270 | 207 | 1.716E-01 | 5.556E-02 | -1.161E-01 | 2.991E-03 |
| Chr04 | 13708156 | 13708653 | 152 | 1.837E-01 | 7.422E-02 | -1.095E-01 | 3.303E-02 |
| Chr04 | 13857561 | 13858046 | 126 | 2.717E-01 | 1.510E-01 | -1.207E-01 | 2.379E-03 |
| Chr04 | 15065883 | 15066371 | 163 | 2.694E-01 | 1.444E-01 | -1.251E-01 | 1.562E-03 |
| Chr04 | 15066375 | 15066863 | 152 | 2.844E-01 | 1.345E-01 | -1.499E-01 | 1.000E-07 |
| Chr04 | 15088933 | 15089423 | 110 | 4.476E-01 | 3.352E-01 | -1.124E-01 | 4.780E-05 |
| Chr05 | 216978   | 217453   | 115 | 1.554E-01 | 4.951E-02 | -1.059E-01 | 6.663E-04 |
| Chr05 | 389841   | 390338   | 205 | 4.128E-01 | 2.690E-01 | -1.438E-01 | 1.110E-02 |
| Chr05 | 602841   | 603335   | 198 | 2.551E-01 | 1.480E-01 | -1.071E-01 | 4.300E-06 |
| Chr05 | 998875   | 999070   | 19  | 5.237E-01 | 1.890E-01 | -3.347E-01 | 1.150E-05 |
| Chr05 | 1089761  | 1090234  | 130 | 4.005E-01 | 2.784E-01 | -1.221E-01 | 9.539E-03 |
| Chr05 | 1421852  | 1422272  | 120 | 7.585E-02 | 2.010E-01 | 1.251E-01  | 3.948E-02 |
| Chr05 | 1550215  | 1550707  | 127 | 5.133E-01 | 4.051E-01 | -1.082E-01 | 1.645E-04 |
| Chr05 | 1781563  | 1782052  | 155 | 2.567E-01 | 1.563E-01 | -1.003E-01 | 0.000E+00 |
| Chr05 | 1834801  | 1835059  | 92  | 3.972E-01 | 2.936E-01 | -1.037E-01 | 8.638E-03 |
| Chr05 | 2007014  | 2007506  | 71  | 2.386E-01 | 1.068E-01 | -1.318E-01 | 1.795E-04 |
| Chr05 | 2241513  | 2241970  | 113 | 4.555E-01 | 3.009E-01 | -1.547E-01 | 2.072E-04 |
| Chr05 | 2751804  | 2752276  | 72  | 5.840E-01 | 4.436E-01 | -1.404E-01 | 2.440E-05 |
| Chr05 | 2767181  | 2767657  | 77  | 2.449E-01 | 1.323E-01 | -1.125E-01 | 8.729E-03 |
| Chr05 | 3002225  | 3002692  | 91  | 2.801E-01 | 1.800E-01 | -1.001E-01 | 9.400E-05 |
| Chr05 | 3284144  | 3284281  | 33  | 2.324E-01 | 3.381E-01 | 1.058E-01  | 4.911E-02 |
| Chr05 | 3799388  | 3799860  | 180 | 2.348E-01 | 1.334E-01 | -1.014E-01 | 0.000E+00 |
| Chr05 | 4717151  | 4717570  | 61  | 3.995E-01 | 2.782E-01 | -1.212E-01 | 1.200E-06 |
| Chr05 | 4719734  | 4720227  | 169 | 2.931E-01 | 1.888E-01 | -1.042E-01 | 2.382E-02 |
| Chr05 | 4724238  | 4724728  | 178 | 2.712E-01 | 1.060E-01 | -1.652E-01 | 4.646E-03 |
| Chr05 | 5000239  | 5000727  | 153 | 1.281E-01 | 2.946E-01 | 1.665E-01  | 1.351E-02 |
| Chr05 | 5910848  | 5911324  | 151 | 5.309E-01 | 4.146E-01 | -1.163E-01 | 3.509E-03 |
| Chr05 | 5971866  | 5972359  | 163 | 2.345E-01 | 1.332E-01 | -1.013E-01 | 1.430E-04 |
| Chr05 | 6144769  | 6145264  | 147 | 3.158E-01 | 2.122E-01 | -1.036E-01 | 8.600E-06 |
| Chr05 | 6318276  | 6318756  | 144 | 3.127E-01 | 2.083E-01 | -1.044E-01 | 2.433E-02 |
| Chr05 | 7029285  | 7029773  | 142 | 1.628E-01 | 3.626E-02 | -1.265E-01 | 1.196E-02 |
| Chr05 | 7111408  | 7111886  | 152 | 3.965E-01 | 2.951E-01 | -1.013E-01 | 4.243E-03 |
| Chr05 | 7709054  | 7709534  | 70  | 4.667E-01 | 2.726E-01 | -1.940E-01 | 2.790E-04 |
| Chr05 | 8206017  | 8206505  | 78  | 5.932E-01 | 3.970E-01 | -1.961E-01 | 2.780E-05 |

|       |          |          |     |           |           |            |           |
|-------|----------|----------|-----|-----------|-----------|------------|-----------|
| Chr05 | 8908821  | 8909303  | 125 | 4.939E-01 | 6.380E-01 | 1.441E-01  | 5.457E-04 |
| Chr05 | 8968116  | 8968608  | 171 | 3.292E-01 | 2.221E-01 | -1.071E-01 | 0.000E+00 |
| Chr05 | 9168160  | 9168601  | 51  | 4.102E-01 | 3.079E-01 | -1.024E-01 | 8.340E-03 |
| Chr05 | 9191651  | 9191814  | 29  | 7.005E-01 | 5.841E-01 | -1.165E-01 | 3.427E-03 |
| Chr05 | 9497525  | 9497606  | 28  | 6.018E-01 | 4.707E-01 | -1.311E-01 | 2.183E-02 |
| Chr05 | 9766434  | 9766564  | 41  | 6.123E-01 | 4.345E-01 | -1.778E-01 | 3.133E-03 |
| Chr05 | 9782154  | 9782545  | 89  | 4.917E-01 | 7.063E-01 | 2.146E-01  | 1.302E-02 |
| Chr05 | 9832099  | 9832531  | 52  | 7.144E-01 | 3.440E-01 | -3.704E-01 | 0.000E+00 |
| Chr05 | 9834023  | 9834141  | 19  | 9.300E-01 | 7.849E-01 | -1.450E-01 | 4.978E-03 |
| Chr05 | 9842057  | 9842385  | 50  | 7.526E-01 | 8.800E-01 | 1.273E-01  | 7.594E-03 |
| Chr05 | 9847015  | 9847342  | 53  | 3.633E-01 | 2.377E-01 | -1.256E-01 | 1.045E-03 |
| Chr05 | 9851630  | 9852035  | 114 | 4.979E-01 | 7.173E-01 | 2.193E-01  | 9.880E-05 |
| Chr05 | 9857812  | 9858303  | 111 | 6.011E-01 | 7.147E-01 | 1.136E-01  | 1.778E-02 |
| Chr05 | 9861465  | 9861786  | 61  | 7.350E-01 | 9.182E-01 | 1.832E-01  | 5.057E-03 |
| Chr05 | 9868735  | 9868773  | 20  | 6.604E-01 | 4.568E-01 | -2.036E-01 | 5.457E-04 |
| Chr05 | 9869410  | 9869657  | 30  | 8.562E-01 | 5.752E-01 | -2.809E-01 | 2.151E-02 |
| Chr05 | 9871929  | 9872235  | 37  | 5.064E-01 | 7.921E-01 | 2.856E-01  | 0.000E+00 |
| Chr05 | 9873436  | 9873814  | 60  | 6.069E-01 | 4.106E-01 | -1.963E-01 | 3.524E-04 |
| Chr05 | 9881185  | 9881288  | 51  | 4.016E-01 | 5.154E-01 | 1.138E-01  | 9.793E-03 |
| Chr05 | 9883396  | 9883840  | 60  | 5.544E-01 | 4.260E-01 | -1.284E-01 | 7.621E-03 |
| Chr05 | 9887662  | 9888029  | 47  | 6.818E-01 | 8.363E-01 | 1.545E-01  | 1.870E-03 |
| Chr05 | 9888401  | 9888767  | 144 | 4.989E-01 | 6.140E-01 | 1.150E-01  | 2.249E-02 |
| Chr05 | 9891400  | 9891447  | 22  | 4.812E-01 | 2.802E-01 | -2.010E-01 | 2.975E-03 |
| Chr05 | 9979107  | 9979483  | 132 | 5.382E-01 | 6.767E-01 | 1.384E-01  | 4.392E-02 |
| Chr05 | 9979495  | 9979927  | 104 | 6.256E-01 | 8.138E-01 | 1.882E-01  | 1.441E-03 |
| Chr05 | 10397402 | 10397881 | 264 | 5.040E-01 | 6.182E-01 | 1.142E-01  | 5.681E-03 |
| Chr05 | 10398845 | 10399326 | 177 | 4.943E-01 | 7.040E-01 | 2.097E-01  | 2.710E-04 |
| Chr05 | 10399491 | 10399801 | 30  | 7.117E-01 | 8.181E-01 | 1.064E-01  | 1.830E-03 |
| Chr05 | 10405038 | 10405494 | 254 | 5.381E-01 | 6.674E-01 | 1.293E-01  | 2.338E-03 |
| Chr05 | 10409325 | 10409761 | 147 | 4.342E-01 | 6.578E-01 | 2.236E-01  | 1.750E-04 |
| Chr05 | 10410242 | 10410697 | 201 | 4.770E-01 | 6.004E-01 | 1.234E-01  | 2.320E-02 |
| Chr05 | 10415165 | 10415662 | 236 | 4.431E-01 | 5.692E-01 | 1.261E-01  | 5.439E-03 |
| Chr05 | 10441627 | 10442104 | 114 | 6.589E-01 | 8.080E-01 | 1.491E-01  | 1.940E-03 |
| Chr05 | 10442600 | 10443080 | 249 | 5.227E-01 | 6.320E-01 | 1.093E-01  | 1.665E-02 |
| Chr05 | 10512671 | 10512788 | 19  | 9.046E-01 | 7.301E-01 | -1.745E-01 | 1.397E-03 |
| Chr05 | 10514439 | 10514633 | 86  | 3.372E-01 | 5.063E-01 | 1.691E-01  | 3.080E-04 |
| Chr05 | 10516988 | 10517207 | 23  | 9.245E-01 | 6.293E-01 | -2.951E-01 | 3.000E-07 |
| Chr05 | 10523107 | 10523477 | 36  | 8.436E-01 | 7.021E-01 | -1.415E-01 | 1.043E-03 |
| Chr05 | 10529013 | 10529427 | 86  | 7.840E-01 | 4.455E-01 | -3.385E-01 | 5.000E-07 |
| Chr05 | 10537132 | 10537424 | 99  | 6.824E-01 | 9.509E-01 | 2.685E-01  | 2.800E-06 |
| Chr05 | 10538085 | 10538482 | 74  | 6.001E-01 | 7.543E-01 | 1.542E-01  | 3.456E-02 |
| Chr05 | 10587566 | 10587783 | 37  | 7.097E-01 | 5.842E-01 | -1.254E-01 | 3.761E-02 |
| Chr05 | 11269686 | 11270180 | 204 | 3.864E-01 | 2.556E-01 | -1.308E-01 | 1.000E-07 |
| Chr05 | 11476595 | 11477083 | 178 | 3.089E-01 | 1.777E-01 | -1.312E-01 | 5.727E-03 |
| Chr05 | 11839095 | 11839533 | 152 | 2.855E-01 | 1.657E-01 | -1.198E-01 | 2.160E-02 |
| Chr05 | 11906879 | 11907373 | 107 | 6.725E-01 | 5.400E-01 | -1.325E-01 | 3.293E-03 |
| Chr05 | 12332743 | 12333189 | 125 | 1.779E-01 | 4.922E-02 | -1.287E-01 | 1.715E-02 |

|       |          |          |     |           |           |            |           |
|-------|----------|----------|-----|-----------|-----------|------------|-----------|
| Chr05 | 12349042 | 12349432 | 115 | 2.092E-01 | 9.353E-02 | -1.157E-01 | 9.210E-05 |
| Chr05 | 12349438 | 12349830 | 94  | 2.205E-01 | 9.120E-02 | -1.293E-01 | 1.787E-04 |
| Chr05 | 12500441 | 12500916 | 129 | 2.121E-01 | 3.517E-01 | 1.396E-01  | 8.227E-03 |
| Chr05 | 12618940 | 12619334 | 88  | 4.001E-01 | 2.529E-01 | -1.471E-01 | 1.084E-03 |
| Chr05 | 14024033 | 14024508 | 64  | 5.111E-01 | 3.829E-01 | -1.281E-01 | 7.096E-04 |
| Chr05 | 14216219 | 14216711 | 142 | 4.318E-01 | 2.515E-01 | -1.803E-01 | 3.804E-04 |
| Chr05 | 14325080 | 14325461 | 59  | 3.357E-01 | 2.277E-01 | -1.080E-01 | 1.213E-03 |
| Chr05 | 14328411 | 14328608 | 39  | 2.729E-01 | 9.341E-02 | -1.794E-01 | 1.540E-05 |
| Chr05 | 14372052 | 14372514 | 173 | 3.327E-01 | 2.063E-01 | -1.265E-01 | 1.000E-07 |
| Chr05 | 14750409 | 14750873 | 105 | 1.488E-01 | 1.056E-02 | -1.383E-01 | 0.000E+00 |
| Chr05 | 15634244 | 15634732 | 176 | 3.580E-01 | 2.194E-01 | -1.386E-01 | 1.000E-07 |
| Chr05 | 15833173 | 15833671 | 208 | 3.599E-01 | 2.403E-01 | -1.196E-01 | 1.406E-02 |
| Chr05 | 15906566 | 15907061 | 157 | 3.743E-01 | 2.454E-01 | -1.289E-01 | 0.000E+00 |
| Chr05 | 15977097 | 15977594 | 210 | 5.104E-01 | 4.011E-01 | -1.094E-01 | 2.493E-02 |
| Chr05 | 16062011 | 16062510 | 136 | 3.277E-01 | 2.123E-01 | -1.154E-01 | 4.300E-03 |
| Chr05 | 16204717 | 16205203 | 150 | 4.015E-01 | 2.701E-01 | -1.315E-01 | 2.144E-04 |
| Chr05 | 16218647 | 16219144 | 171 | 2.758E-01 | 1.538E-01 | -1.220E-01 | 1.363E-03 |
| Chr05 | 16601261 | 16601621 | 59  | 2.755E-01 | 1.541E-01 | -1.214E-01 | 1.370E-05 |
| Chr05 | 17165157 | 17165607 | 74  | 4.780E-01 | 3.760E-01 | -1.020E-01 | 1.356E-04 |
| Chr06 | 550088   | 550573   | 194 | 2.855E-01 | 1.734E-01 | -1.122E-01 | 0.000E+00 |
| Chr06 | 875139   | 875625   | 127 | 2.216E-01 | 6.009E-02 | -1.615E-01 | 8.200E-06 |
| Chr06 | 1020152  | 1020643  | 210 | 3.260E-01 | 2.205E-01 | -1.055E-01 | 3.569E-02 |
| Chr06 | 1530378  | 1530873  | 97  | 4.617E-01 | 3.441E-01 | -1.176E-01 | 2.000E-07 |
| Chr06 | 1853997  | 1854144  | 30  | 1.661E-01 | 3.212E-01 | 1.551E-01  | 2.510E-03 |
| Chr06 | 2276086  | 2276576  | 209 | 4.144E-01 | 3.117E-01 | -1.027E-01 | 3.109E-02 |
| Chr06 | 2390989  | 2391487  | 166 | 3.367E-01 | 2.235E-01 | -1.132E-01 | 5.418E-04 |
| Chr06 | 6497700  | 6497789  | 7   | 2.882E-01 | 1.234E-01 | -1.647E-01 | 1.185E-03 |
| Chr06 | 6996766  | 6997263  | 120 | 4.032E-01 | 3.003E-01 | -1.029E-01 | 0.000E+00 |
| Chr06 | 7183099  | 7183262  | 41  | 6.084E-01 | 3.910E-01 | -2.174E-01 | 7.226E-03 |
| Chr06 | 7545956  | 7546449  | 112 | 3.748E-01 | 2.307E-01 | -1.441E-01 | 3.600E-06 |
| Chr06 | 7778387  | 7778884  | 191 | 2.159E-01 | 1.132E-01 | -1.027E-01 | 7.955E-04 |
| Chr06 | 8159081  | 8159576  | 160 | 3.507E-01 | 2.480E-01 | -1.027E-01 | 4.517E-03 |
| Chr06 | 8681808  | 8682304  | 158 | 2.147E-01 | 1.062E-01 | -1.085E-01 | 6.470E-05 |
| Chr06 | 8909766  | 8910248  | 117 | 2.639E-02 | 1.852E-01 | 1.588E-01  | 2.000E-07 |
| Chr06 | 8912181  | 8912657  | 161 | 4.160E-01 | 2.454E-01 | -1.706E-01 | 5.529E-03 |
| Chr06 | 9075228  | 9075642  | 66  | 6.579E-01 | 3.688E-01 | -2.891E-01 | 2.000E-07 |
| Chr06 | 9204862  | 9205358  | 157 | 4.150E-01 | 2.820E-01 | -1.329E-01 | 1.950E-05 |
| Chr06 | 9486012  | 9486508  | 85  | 4.764E-01 | 3.683E-01 | -1.082E-01 | 1.840E-05 |
| Chr06 | 9486511  | 9487008  | 151 | 3.575E-01 | 2.312E-01 | -1.263E-01 | 0.000E+00 |
| Chr06 | 9487010  | 9487507  | 193 | 4.282E-01 | 3.256E-01 | -1.026E-01 | 0.000E+00 |
| Chr06 | 9487520  | 9488005  | 128 | 4.021E-01 | 2.769E-01 | -1.253E-01 | 3.000E-07 |
| Chr06 | 9488012  | 9488504  | 180 | 4.102E-01 | 2.811E-01 | -1.291E-01 | 0.000E+00 |
| Chr06 | 9488512  | 9489006  | 157 | 3.978E-01 | 2.867E-01 | -1.111E-01 | 0.000E+00 |
| Chr06 | 9490507  | 9491006  | 211 | 4.153E-01 | 3.150E-01 | -1.003E-01 | 1.500E-06 |
| Chr06 | 9491009  | 9491503  | 207 | 3.931E-01 | 2.896E-01 | -1.035E-01 | 0.000E+00 |
| Chr06 | 9491509  | 9492005  | 205 | 4.298E-01 | 3.283E-01 | -1.015E-01 | 1.690E-05 |
| Chr06 | 9494007  | 9494498  | 197 | 2.816E-01 | 1.700E-01 | -1.116E-01 | 0.000E+00 |

|       |          |          |     |           |           |            |           |
|-------|----------|----------|-----|-----------|-----------|------------|-----------|
| Chr06 | 10506620 | 10507067 | 120 | 2.799E-01 | 1.158E-01 | -1.642E-01 | 2.008E-04 |
| Chr06 | 10543041 | 10543526 | 142 | 3.384E-01 | 1.696E-01 | -1.688E-01 | 2.408E-03 |
| Chr06 | 10598337 | 10598823 | 186 | 4.839E-01 | 3.510E-01 | -1.329E-01 | 4.521E-04 |
| Chr06 | 11077291 | 11077786 | 106 | 5.877E-01 | 4.244E-01 | -1.633E-01 | 1.700E-06 |
| Chr06 | 11283425 | 11283909 | 137 | 4.676E-01 | 5.752E-01 | 1.076E-01  | 2.298E-02 |
| Chr06 | 11772454 | 11772601 | 37  | 1.342E-01 | 2.396E-01 | 1.054E-01  | 1.047E-02 |
| Chr06 | 12470340 | 12470821 | 108 | 2.427E-01 | 1.416E-01 | -1.011E-01 | 2.869E-04 |
| Chr06 | 12474932 | 12475068 | 25  | 4.749E-01 | 1.853E-01 | -2.896E-01 | 0.000E+00 |
| Chr06 | 12628227 | 12628714 | 109 | 3.750E-01 | 2.749E-01 | -1.001E-01 | 5.000E-06 |
| Chr06 | 13015607 | 13016014 | 71  | 2.032E-01 | 9.476E-02 | -1.084E-01 | 0.000E+00 |
| Chr06 | 13543836 | 13544082 | 52  | 2.261E-01 | 8.462E-02 | -1.415E-01 | 7.079E-04 |
| Chr06 | 14269569 | 14270046 | 172 | 3.452E-01 | 2.075E-01 | -1.377E-01 | 1.424E-02 |
| Chr06 | 14339188 | 14339679 | 151 | 8.685E-02 | 3.123E-01 | 2.254E-01  | 3.194E-03 |
| Chr06 | 14993627 | 14994071 | 127 | 7.668E-02 | 1.806E-01 | 1.039E-01  | 3.953E-02 |
| Chr06 | 15646292 | 15646786 | 215 | 3.909E-01 | 1.730E-01 | -2.179E-01 | 9.859E-04 |
| Chr06 | 16014720 | 16015215 | 177 | 3.112E-01 | 2.047E-01 | -1.065E-01 | 6.771E-03 |
| Chr06 | 16167355 | 16167844 | 176 | 3.673E-01 | 2.668E-01 | -1.005E-01 | 3.132E-04 |
| Chr06 | 17055439 | 17055909 | 170 | 3.728E-01 | 2.688E-01 | -1.040E-01 | 2.388E-04 |
| Chr06 | 17349392 | 17349880 | 195 | 4.505E-01 | 3.323E-01 | -1.182E-01 | 7.179E-03 |
| Chr06 | 17540810 | 17541301 | 107 | 3.469E-01 | 2.405E-01 | -1.064E-01 | 1.940E-05 |
| Chr06 | 17929413 | 17929903 | 163 | 2.108E-01 | 1.103E-01 | -1.005E-01 | 0.000E+00 |
| Chr06 | 18547182 | 18547663 | 212 | 3.570E-01 | 2.264E-01 | -1.306E-01 | 5.955E-04 |
| Chr06 | 18949052 | 18949520 | 120 | 6.199E-01 | 5.119E-01 | -1.080E-01 | 4.080E-03 |
| Chr06 | 19198191 | 19198685 | 174 | 3.655E-01 | 2.306E-01 | -1.348E-01 | 5.288E-04 |
| Chr06 | 19534531 | 19535021 | 175 | 4.344E-01 | 2.578E-01 | -1.767E-01 | 1.956E-02 |
| Chr06 | 19563442 | 19563932 | 154 | 3.211E-01 | 1.319E-01 | -1.891E-01 | 0.000E+00 |
| Chr06 | 19570775 | 19571268 | 92  | 4.651E-01 | 3.387E-01 | -1.264E-01 | 4.936E-02 |
| Chr06 | 19607833 | 19608314 | 152 | 3.849E-01 | 2.815E-01 | -1.034E-01 | 1.614E-04 |
| Chr07 | 451459   | 451956   | 142 | 3.104E-01 | 1.551E-01 | -1.554E-01 | 4.915E-02 |
| Chr07 | 1002848  | 1003338  | 158 | 2.354E-01 | 1.295E-01 | -1.059E-01 | 3.248E-03 |
| Chr07 | 1010417  | 1010911  | 169 | 3.615E-01 | 2.394E-01 | -1.221E-01 | 1.195E-04 |
| Chr07 | 2036805  | 2037091  | 74  | 4.788E-01 | 3.471E-01 | -1.317E-01 | 5.099E-03 |
| Chr07 | 2517761  | 2518246  | 162 | 3.454E-01 | 2.141E-01 | -1.313E-01 | 4.000E-07 |
| Chr07 | 2599696  | 2600095  | 136 | 2.856E-01 | 1.846E-01 | -1.009E-01 | 8.000E-07 |
| Chr07 | 2643756  | 2644249  | 153 | 2.036E-01 | 1.028E-01 | -1.008E-01 | 9.590E-05 |
| Chr07 | 2678661  | 2679155  | 168 | 2.598E-01 | 1.569E-01 | -1.029E-01 | 2.000E-07 |
| Chr07 | 2842233  | 2842727  | 145 | 3.192E-01 | 2.177E-01 | -1.015E-01 | 1.274E-04 |
| Chr07 | 3175211  | 3175699  | 106 | 4.881E-01 | 3.331E-01 | -1.550E-01 | 4.005E-04 |
| Chr07 | 3320035  | 3320513  | 209 | 4.832E-01 | 3.485E-01 | -1.348E-01 | 1.109E-03 |
| Chr07 | 3776869  | 3777351  | 99  | 4.006E-01 | 2.773E-01 | -1.233E-01 | 8.720E-05 |
| Chr07 | 3906873  | 3907366  | 189 | 2.349E-01 | 1.149E-01 | -1.201E-01 | 1.759E-02 |
| Chr07 | 4071426  | 4071919  | 223 | 4.680E-01 | 3.383E-01 | -1.297E-01 | 1.279E-04 |
| Chr07 | 4271493  | 4271986  | 153 | 2.670E-01 | 1.496E-01 | -1.174E-01 | 1.200E-06 |
| Chr07 | 4504164  | 4504647  | 156 | 4.083E-01 | 2.970E-01 | -1.113E-01 | 2.477E-03 |
| Chr07 | 4580636  | 4581101  | 52  | 2.511E-01 | 1.491E-01 | -1.020E-01 | 0.000E+00 |
| Chr07 | 4799817  | 4800283  | 34  | 3.342E-01 | 1.944E-01 | -1.399E-01 | 1.188E-02 |
| Chr07 | 5091189  | 5091683  | 150 | 2.684E-01 | 3.727E-01 | 1.044E-01  | 2.113E-03 |

|       |          |          |     |           |           |            |           |
|-------|----------|----------|-----|-----------|-----------|------------|-----------|
| Chr07 | 5273085  | 5273507  | 116 | 4.058E-01 | 3.021E-01 | -1.037E-01 | 5.969E-04 |
| Chr07 | 5307580  | 5307952  | 53  | 1.513E-01 | 3.106E-02 | -1.202E-01 | 1.790E-05 |
| Chr07 | 5352110  | 5352435  | 80  | 3.818E-01 | 2.787E-01 | -1.031E-01 | 1.862E-03 |
| Chr07 | 5434388  | 5434844  | 92  | 1.709E-01 | 2.623E-02 | -1.446E-01 | 6.243E-03 |
| Chr07 | 5703884  | 5704286  | 67  | 3.939E-01 | 5.356E-01 | 1.417E-01  | 3.132E-03 |
| Chr07 | 5704782  | 5705166  | 126 | 3.602E-01 | 4.671E-01 | 1.069E-01  | 6.600E-05 |
| Chr07 | 5710895  | 5711310  | 67  | 7.780E-01 | 6.453E-01 | -1.327E-01 | 1.164E-03 |
| Chr07 | 5736368  | 5736651  | 142 | 6.095E-01 | 4.900E-01 | -1.195E-01 | 7.109E-03 |
| Chr07 | 5737848  | 5738265  | 192 | 4.496E-01 | 5.691E-01 | 1.195E-01  | 9.375E-03 |
| Chr07 | 5750609  | 5751095  | 253 | 5.093E-01 | 6.365E-01 | 1.273E-01  | 5.802E-03 |
| Chr07 | 5759071  | 5759541  | 241 | 5.157E-01 | 6.379E-01 | 1.221E-01  | 5.978E-04 |
| Chr07 | 5759548  | 5760021  | 215 | 5.172E-01 | 6.811E-01 | 1.639E-01  | 4.875E-03 |
| Chr07 | 5761782  | 5762254  | 109 | 3.907E-01 | 5.188E-01 | 1.280E-01  | 6.915E-03 |
| Chr07 | 5767058  | 5767437  | 117 | 3.648E-01 | 5.225E-01 | 1.577E-01  | 1.157E-02 |
| Chr07 | 5788977  | 5789115  | 23  | 1.304E-01 | 2.450E-01 | 1.146E-01  | 1.553E-02 |
| Chr07 | 5806406  | 5806796  | 102 | 5.338E-01 | 6.788E-01 | 1.450E-01  | 1.965E-02 |
| Chr07 | 5806910  | 5807362  | 228 | 4.348E-01 | 5.377E-01 | 1.029E-01  | 1.624E-02 |
| Chr07 | 5820293  | 5820758  | 265 | 5.113E-01 | 6.258E-01 | 1.145E-01  | 1.682E-02 |
| Chr07 | 5821229  | 5821690  | 226 | 5.090E-01 | 6.540E-01 | 1.451E-01  | 5.970E-04 |
| Chr07 | 5833202  | 5833336  | 16  | 7.868E-01 | 9.453E-01 | 1.585E-01  | 2.745E-03 |
| Chr07 | 5874990  | 5875424  | 141 | 5.087E-01 | 6.182E-01 | 1.095E-01  | 3.105E-02 |
| Chr07 | 5887664  | 5888109  | 223 | 4.647E-01 | 5.937E-01 | 1.289E-01  | 4.279E-03 |
| Chr07 | 5919756  | 5919834  | 21  | 6.629E-01 | 3.550E-01 | -3.078E-01 | 3.980E-05 |
| Chr07 | 5919954  | 5920309  | 136 | 3.642E-01 | 4.723E-01 | 1.081E-01  | 1.376E-02 |
| Chr07 | 5930931  | 5931340  | 187 | 7.097E-01 | 5.248E-01 | -1.849E-01 | 2.491E-04 |
| Chr07 | 5936188  | 5936293  | 41  | 4.883E-01 | 3.882E-01 | -1.001E-01 | 4.008E-02 |
| Chr07 | 5948346  | 5948690  | 136 | 4.575E-01 | 5.800E-01 | 1.225E-01  | 1.858E-03 |
| Chr07 | 6277176  | 6277652  | 178 | 6.537E-01 | 7.642E-01 | 1.105E-01  | 4.937E-03 |
| Chr07 | 6284852  | 6285326  | 182 | 5.490E-01 | 6.954E-01 | 1.465E-01  | 2.611E-04 |
| Chr07 | 6291929  | 6292264  | 120 | 5.350E-01 | 6.843E-01 | 1.493E-01  | 3.895E-03 |
| Chr07 | 6462216  | 6462705  | 121 | 3.616E-01 | 2.535E-01 | -1.081E-01 | 0.000E+00 |
| Chr07 | 6501893  | 6502349  | 137 | 3.876E-01 | 2.855E-01 | -1.021E-01 | 3.200E-06 |
| Chr07 | 6516461  | 6516898  | 77  | 3.700E-01 | 2.368E-01 | -1.331E-01 | 9.410E-05 |
| Chr07 | 6624937  | 6625397  | 39  | 2.804E-02 | 1.387E-01 | 1.106E-01  | 1.770E-03 |
| Chr07 | 6629952  | 6630146  | 20  | 4.717E-04 | 3.567E-01 | 3.562E-01  | 0.000E+00 |
| Chr07 | 6660271  | 6660766  | 79  | 4.859E-01 | 3.751E-01 | -1.108E-01 | 3.755E-03 |
| Chr07 | 6964123  | 6964191  | 20  | 2.407E-01 | 8.435E-02 | -1.564E-01 | 1.280E-02 |
| Chr07 | 7378620  | 7379110  | 163 | 3.111E-01 | 1.865E-01 | -1.246E-01 | 9.345E-03 |
| Chr07 | 7441064  | 7441563  | 190 | 2.011E-01 | 1.010E-01 | -1.001E-01 | 4.687E-02 |
| Chr07 | 7442091  | 7442568  | 148 | 3.378E-01 | 2.278E-01 | -1.100E-01 | 1.852E-03 |
| Chr07 | 8200129  | 8200581  | 139 | 3.705E-01 | 2.612E-01 | -1.093E-01 | 9.232E-04 |
| Chr07 | 8709570  | 8709754  | 52  | 4.116E-01 | 5.294E-01 | 1.178E-01  | 1.434E-02 |
| Chr07 | 10654624 | 10655118 | 174 | 3.849E-01 | 2.624E-01 | -1.226E-01 | 2.270E-02 |
| Chr07 | 10655119 | 10655605 | 185 | 4.610E-01 | 2.733E-01 | -1.877E-01 | 6.370E-04 |
| Chr07 | 10896398 | 10896888 | 112 | 3.953E-01 | 2.946E-01 | -1.007E-01 | 1.012E-03 |
| Chr07 | 10936405 | 10936830 | 119 | 4.089E-01 | 2.608E-01 | -1.482E-01 | 4.218E-02 |
| Chr07 | 10951505 | 10951994 | 150 | 3.126E-01 | 1.981E-01 | -1.144E-01 | 1.046E-03 |

|       |          |          |     |           |           |            |           |
|-------|----------|----------|-----|-----------|-----------|------------|-----------|
| Chr07 | 11089188 | 11089677 | 170 | 4.386E-01 | 3.351E-01 | -1.036E-01 | 1.710E-05 |
| Chr07 | 11486108 | 11486603 | 146 | 4.071E-01 | 2.155E-01 | -1.916E-01 | 4.262E-03 |
| Chr07 | 11702528 | 11703023 | 136 | 2.444E-01 | 1.357E-01 | -1.087E-01 | 3.266E-04 |
| Chr07 | 11771605 | 11772098 | 178 | 2.796E-01 | 1.550E-01 | -1.247E-01 | 1.584E-02 |
| Chr07 | 11941297 | 11941776 | 124 | 4.437E-01 | 3.403E-01 | -1.034E-01 | 4.426E-02 |
| Chr07 | 12083446 | 12083942 | 162 | 5.283E-01 | 4.140E-01 | -1.143E-01 | 5.610E-04 |
| Chr07 | 12208242 | 12208732 | 133 | 3.320E-01 | 1.839E-01 | -1.481E-01 | 5.246E-03 |
| Chr08 | 313253   | 313751   | 201 | 7.299E-02 | 2.407E-01 | 1.678E-01  | 3.107E-04 |
| Chr08 | 646750   | 647247   | 142 | 2.775E-01 | 1.560E-01 | -1.215E-01 | 3.913E-04 |
| Chr08 | 761800   | 762062   | 31  | 3.760E-01 | 2.680E-01 | -1.080E-01 | 3.421E-03 |
| Chr08 | 1099851  | 1100245  | 98  | 3.714E-01 | 2.686E-01 | -1.028E-01 | 1.334E-02 |
| Chr08 | 1256598  | 1257077  | 106 | 3.522E-01 | 2.391E-01 | -1.130E-01 | 2.482E-04 |
| Chr08 | 1441327  | 1441658  | 71  | 4.107E-01 | 2.970E-01 | -1.137E-01 | 2.000E-07 |
| Chr08 | 1664597  | 1665086  | 148 | 3.781E-02 | 1.409E-01 | 1.031E-01  | 1.327E-02 |
| Chr08 | 1714088  | 1714566  | 173 | 3.201E-01 | 1.954E-01 | -1.247E-01 | 6.427E-03 |
| Chr08 | 1768051  | 1768546  | 136 | 3.374E-01 | 2.317E-01 | -1.057E-01 | 2.300E-05 |
| Chr08 | 2075817  | 2076270  | 127 | 3.087E-01 | 1.963E-01 | -1.124E-01 | 7.932E-03 |
| Chr08 | 2230473  | 2230662  | 27  | 2.604E-01 | 1.288E-01 | -1.316E-01 | 5.770E-05 |
| Chr08 | 2317484  | 2317976  | 198 | 2.021E-01 | 9.877E-02 | -1.033E-01 | 4.394E-02 |
| Chr08 | 2364143  | 2364633  | 156 | 2.615E-01 | 1.588E-01 | -1.027E-01 | 3.016E-02 |
| Chr08 | 2698281  | 2698772  | 162 | 2.518E-01 | 1.377E-01 | -1.141E-01 | 5.414E-03 |
| Chr08 | 3490602  | 3491093  | 178 | 1.962E-01 | 9.201E-02 | -1.041E-01 | 1.898E-02 |
| Chr08 | 3896356  | 3896840  | 117 | 1.500E-01 | 4.516E-02 | -1.048E-01 | 4.031E-02 |
| Chr08 | 3902404  | 3902775  | 69  | 5.038E-01 | 3.695E-01 | -1.343E-01 | 6.731E-03 |
| Chr08 | 4014969  | 4015466  | 179 | 2.247E-01 | 9.316E-02 | -1.315E-01 | 4.740E-03 |
| Chr08 | 4655997  | 4656489  | 144 | 4.666E-01 | 3.304E-01 | -1.362E-01 | 3.735E-04 |
| Chr08 | 4697495  | 4697976  | 113 | 4.201E-01 | 3.133E-01 | -1.068E-01 | 2.605E-04 |
| Chr08 | 5398038  | 5398471  | 80  | 5.092E-01 | 4.090E-01 | -1.002E-01 | 3.709E-02 |
| Chr08 | 5496840  | 5497332  | 140 | 1.332E-01 | 2.834E-02 | -1.049E-01 | 3.040E-03 |
| Chr08 | 6433863  | 6434350  | 165 | 3.922E-01 | 2.881E-01 | -1.041E-01 | 9.707E-04 |
| Chr08 | 6933718  | 6934196  | 77  | 4.451E-01 | 3.342E-01 | -1.110E-01 | 8.830E-05 |
| Chr08 | 6995979  | 6996393  | 89  | 3.365E-01 | 2.037E-01 | -1.328E-01 | 0.000E+00 |
| Chr08 | 8385081  | 8385510  | 114 | 3.768E-01 | 2.712E-01 | -1.056E-01 | 2.066E-02 |
| Chr08 | 8712073  | 8712556  | 167 | 3.462E-01 | 2.015E-01 | -1.447E-01 | 2.209E-02 |
| Chr08 | 8745017  | 8745507  | 164 | 2.676E-01 | 1.359E-01 | -1.317E-01 | 3.900E-06 |
| Chr08 | 9445984  | 9446480  | 143 | 3.833E-01 | 2.831E-01 | -1.002E-01 | 1.353E-02 |
| Chr08 | 9546102  | 9546579  | 156 | 9.161E-02 | 1.950E-01 | 1.034E-01  | 4.095E-02 |
| Chr08 | 9655834  | 9656325  | 182 | 2.314E-01 | 1.167E-01 | -1.147E-01 | 0.000E+00 |
| Chr08 | 10151841 | 10152339 | 208 | 3.092E-01 | 1.422E-01 | -1.670E-01 | 2.684E-04 |
| Chr08 | 10223961 | 10224314 | 117 | 4.644E-01 | 3.579E-01 | -1.066E-01 | 3.514E-02 |
| Chr08 | 10759522 | 10760008 | 45  | 7.631E-01 | 6.477E-01 | -1.154E-01 | 3.711E-03 |
| Chr08 | 10811407 | 10811901 | 185 | 1.101E-01 | 9.009E-03 | -1.011E-01 | 2.240E-02 |
| Chr08 | 11019184 | 11019679 | 129 | 4.417E-01 | 3.056E-01 | -1.361E-01 | 3.042E-02 |
| Chr08 | 12360241 | 12360731 | 173 | 3.543E-01 | 2.303E-01 | -1.240E-01 | 4.147E-03 |
| Chr08 | 12774409 | 12774907 | 112 | 6.179E-01 | 5.178E-01 | -1.002E-01 | 3.000E-07 |
| Chr08 | 12968739 | 12969237 | 205 | 2.289E-01 | 9.050E-02 | -1.384E-01 | 2.326E-03 |
| Chr08 | 13272553 | 13273038 | 185 | 3.902E-01 | 2.506E-01 | -1.395E-01 | 2.550E-05 |

|       |         |         |     |           |           |            |           |
|-------|---------|---------|-----|-----------|-----------|------------|-----------|
| Chr09 | 91400   | 91896   | 149 | 2.193E-03 | 1.819E-01 | 1.797E-01  | 2.032E-02 |
| Chr09 | 206555  | 206678  | 28  | 1.528E-03 | 2.034E-01 | 2.019E-01  | 0.000E+00 |
| Chr09 | 1618061 | 1618552 | 178 | 4.246E-01 | 3.201E-01 | -1.045E-01 | 1.515E-03 |
| Chr09 | 1744284 | 1744731 | 115 | 3.501E-01 | 2.419E-01 | -1.083E-01 | 4.962E-03 |
| Chr09 | 1745394 | 1745872 | 120 | 3.761E-01 | 2.484E-01 | -1.276E-01 | 1.383E-03 |
| Chr09 | 1752337 | 1752769 | 120 | 1.741E-01 | 2.760E-01 | 1.019E-01  | 6.772E-04 |
| Chr09 | 2495053 | 2495443 | 56  | 3.980E-01 | 2.662E-01 | -1.319E-01 | 5.931E-03 |
| Chr09 | 3182963 | 3183451 | 152 | 3.286E-01 | 2.062E-01 | -1.223E-01 | 1.559E-02 |
| Chr09 | 3190881 | 3191371 | 146 | 3.513E-01 | 2.342E-01 | -1.170E-01 | 4.260E-05 |
| Chr09 | 3342214 | 3342475 | 33  | 4.233E-01 | 3.222E-01 | -1.011E-01 | 1.575E-02 |
| Chr09 | 3485999 | 3486497 | 142 | 6.276E-01 | 5.215E-01 | -1.061E-01 | 2.806E-03 |
| Chr09 | 4751170 | 4751663 | 185 | 2.877E-01 | 1.554E-01 | -1.323E-01 | 3.391E-03 |
| Chr09 | 4763107 | 4763600 | 173 | 2.673E-01 | 1.210E-01 | -1.463E-01 | 2.251E-02 |
| Chr09 | 5525256 | 5525359 | 23  | 5.814E-01 | 4.550E-01 | -1.264E-01 | 1.764E-02 |
| Chr09 | 5760706 | 5761200 | 128 | 2.942E-01 | 1.871E-01 | -1.071E-01 | 3.360E-05 |
| Chr09 | 6807304 | 6807794 | 95  | 3.149E-01 | 1.909E-01 | -1.240E-01 | 2.278E-03 |
| Chr09 | 7203022 | 7203520 | 113 | 3.698E-01 | 2.664E-01 | -1.034E-01 | 9.400E-06 |
| Chr09 | 7504455 | 7504945 | 153 | 6.108E-02 | 1.933E-01 | 1.322E-01  | 2.966E-04 |
| Chr09 | 7639428 | 7639916 | 177 | 4.500E-01 | 3.341E-01 | -1.159E-01 | 8.989E-03 |
| Chr09 | 8231238 | 8231734 | 118 | 3.308E-01 | 2.228E-01 | -1.080E-01 | 1.830E-05 |
| Chr09 | 8234733 | 8235232 | 91  | 3.243E-01 | 1.907E-01 | -1.336E-01 | 1.170E-05 |
| Chr09 | 8572755 | 8573207 | 51  | 2.614E-01 | 1.224E-01 | -1.390E-01 | 1.317E-04 |
| Chr09 | 9450450 | 9450677 | 22  | 1.578E-01 | 5.396E-02 | -1.039E-01 | 1.601E-02 |
| Chr09 | 9450824 | 9450967 | 31  | 1.074E-01 | 5.950E-03 | -1.014E-01 | 1.296E-03 |
| Chr09 | 9471218 | 9471561 | 94  | 3.881E-01 | 2.590E-01 | -1.291E-01 | 8.244E-03 |
| Chr09 | 9899796 | 9900195 | 86  | 7.701E-02 | 4.665E-01 | 3.895E-01  | 3.100E-06 |
| Chr10 | 174068  | 174565  | 114 | 4.435E-01 | 3.199E-01 | -1.236E-01 | 1.450E-03 |
| Chr10 | 351826  | 352319  | 123 | 6.511E-01 | 4.868E-01 | -1.644E-01 | 9.500E-05 |
| Chr10 | 404428  | 404916  | 144 | 2.532E-01 | 1.353E-01 | -1.179E-01 | 1.500E-06 |
| Chr10 | 1238856 | 1239031 | 59  | 1.469E-01 | 3.188E-01 | 1.719E-01  | 4.876E-02 |
| Chr10 | 1719044 | 1719455 | 100 | 2.296E-01 | 9.012E-02 | -1.395E-01 | 6.452E-03 |
| Chr10 | 2090376 | 2090872 | 165 | 2.420E-01 | 1.063E-01 | -1.357E-01 | 0.000E+00 |
| Chr10 | 2491707 | 2492205 | 89  | 7.879E-02 | 2.493E-01 | 1.706E-01  | 4.852E-02 |
| Chr10 | 2520475 | 2520757 | 36  | 4.298E-02 | 2.388E-01 | 1.958E-01  | 1.520E-05 |
| Chr10 | 2985356 | 2985843 | 154 | 2.801E-01 | 1.675E-01 | -1.126E-01 | 1.000E-07 |
| Chr10 | 3001935 | 3002422 | 159 | 4.150E-01 | 3.102E-01 | -1.048E-01 | 4.954E-04 |
| Chr10 | 3011343 | 3011836 | 147 | 2.518E-01 | 1.400E-01 | -1.118E-01 | 1.274E-02 |
| Chr10 | 3039267 | 3039634 | 98  | 4.072E-01 | 3.003E-01 | -1.069E-01 | 1.044E-03 |
| Chr10 | 3957717 | 3958215 | 165 | 5.922E-01 | 4.347E-01 | -1.575E-01 | 0.000E+00 |
| Chr10 | 3977594 | 3978010 | 53  | 3.386E-01 | 1.968E-01 | -1.419E-01 | 2.526E-03 |
| Chr10 | 4029630 | 4030102 | 90  | 3.145E-01 | 1.945E-01 | -1.200E-01 | 1.248E-03 |
| Chr10 | 4247523 | 4247989 | 117 | 4.072E-01 | 3.055E-01 | -1.017E-01 | 1.644E-03 |
| Chr10 | 4362713 | 4363201 | 188 | 4.461E-01 | 3.442E-01 | -1.018E-01 | 0.000E+00 |
| Chr10 | 4407044 | 4407467 | 55  | 4.502E-01 | 6.189E-01 | 1.686E-01  | 4.138E-03 |
| Chr10 | 5208012 | 5208504 | 142 | 5.558E-01 | 3.951E-01 | -1.607E-01 | 4.880E-05 |
| Chr10 | 5372906 | 5373345 | 27  | 2.612E-01 | 1.352E-01 | -1.260E-01 | 6.347E-03 |
| Chr10 | 7631655 | 7632139 | 106 | 3.802E-01 | 2.385E-01 | -1.417E-01 | 0.000E+00 |

|       |          |          |     |           |           |            |           |
|-------|----------|----------|-----|-----------|-----------|------------|-----------|
| Chr10 | 7712852  | 7713347  | 157 | 3.060E-01 | 1.990E-01 | -1.070E-01 | 3.090E-05 |
| Chr10 | 7733277  | 7733767  | 189 | 3.265E-01 | 2.178E-01 | -1.087E-01 | 6.410E-05 |
| Chr10 | 8006923  | 8007411  | 91  | 2.440E-01 | 1.333E-01 | -1.107E-01 | 1.138E-04 |
| Chr10 | 8161283  | 8161754  | 70  | 4.224E-01 | 3.004E-01 | -1.220E-01 | 1.160E-05 |
| Chr10 | 8637633  | 8638129  | 113 | 3.559E-01 | 2.350E-01 | -1.209E-01 | 1.216E-04 |
| Chr10 | 8796343  | 8796834  | 173 | 4.287E-01 | 3.064E-01 | -1.223E-01 | 2.547E-04 |
| Chr10 | 9287859  | 9288348  | 107 | 4.171E-01 | 3.001E-01 | -1.170E-01 | 2.640E-05 |
| Chr10 | 10475916 | 10476412 | 133 | 2.622E-01 | 1.048E-01 | -1.573E-01 | 1.196E-03 |
| Chr10 | 10490845 | 10491332 | 113 | 3.964E-01 | 2.818E-01 | -1.146E-01 | 2.095E-02 |
| Chr10 | 10629695 | 10630191 | 158 | 2.589E-01 | 1.531E-01 | -1.058E-01 | 4.009E-02 |
| Chr10 | 11065978 | 11066169 | 46  | 2.721E-01 | 4.043E-01 | 1.322E-01  | 1.756E-02 |
| Chr10 | 11096083 | 11096553 | 63  | 4.463E-01 | 3.324E-01 | -1.139E-01 | 3.810E-02 |
| Chr10 | 11566913 | 11567407 | 224 | 1.444E-01 | 5.345E-03 | -1.391E-01 | 0.000E+00 |
| Chr10 | 11567409 | 11567905 | 179 | 1.947E-01 | 9.975E-03 | -1.847E-01 | 1.900E-04 |
| Chr10 | 11567908 | 11568404 | 210 | 1.385E-01 | 4.434E-03 | -1.341E-01 | 0.000E+00 |
| Chr10 | 11576037 | 11576534 | 207 | 1.101E-01 | 6.097E-03 | -1.040E-01 | 1.000E-07 |
| Chr10 | 11922167 | 11922265 | 18  | 4.532E-01 | 2.746E-01 | -1.785E-01 | 1.493E-02 |
| Chr10 | 12260095 | 12260578 | 198 | 4.100E-01 | 2.922E-01 | -1.178E-01 | 2.759E-02 |
| Chr10 | 12746351 | 12746844 | 160 | 3.535E-01 | 2.122E-01 | -1.413E-01 | 3.100E-04 |
| Chr10 | 12958555 | 12959048 | 183 | 3.509E-01 | 2.310E-01 | -1.200E-01 | 1.609E-04 |
| Chr10 | 13122012 | 13122506 | 126 | 2.171E-01 | 3.330E-01 | 1.160E-01  | 3.107E-03 |
| Chr10 | 13469932 | 13470282 | 52  | 2.592E-01 | 4.303E-01 | 1.711E-01  | 6.586E-03 |
| Chr10 | 13753157 | 13753638 | 141 | 4.187E-01 | 3.079E-01 | -1.109E-01 | 2.900E-06 |
| Chr10 | 14712750 | 14713019 | 47  | 5.725E-01 | 4.477E-01 | -1.248E-01 | 8.990E-05 |
| Chr10 | 14895565 | 14895797 | 48  | 2.539E-01 | 5.352E-02 | -2.003E-01 | 4.250E-05 |
| Chr10 | 15053171 | 15053648 | 148 | 4.529E-01 | 3.431E-01 | -1.097E-01 | 0.000E+00 |
| Chr10 | 15365286 | 15365582 | 62  | 1.062E-01 | 5.510E-03 | -1.007E-01 | 4.138E-04 |
| Chr10 | 15381751 | 15382179 | 83  | 1.297E-01 | 2.397E-01 | 1.100E-01  | 1.333E-04 |
| Chr11 | 440674   | 441170   | 88  | 6.049E-01 | 4.989E-01 | -1.061E-01 | 1.060E-05 |
| Chr11 | 689192   | 689689   | 184 | 2.265E-01 | 8.919E-02 | -1.373E-01 | 1.382E-02 |
| Chr11 | 770971   | 771453   | 87  | 2.402E-01 | 7.259E-02 | -1.676E-01 | 3.570E-02 |
| Chr11 | 781901   | 782396   | 154 | 2.660E-01 | 1.285E-01 | -1.374E-01 | 9.687E-03 |
| Chr11 | 782398   | 782895   | 79  | 2.628E-01 | 4.065E-03 | -2.588E-01 | 3.132E-02 |
| Chr11 | 783021   | 783502   | 197 | 2.639E-01 | 9.807E-02 | -1.659E-01 | 1.215E-02 |
| Chr11 | 832252   | 832701   | 77  | 5.164E-01 | 2.898E-01 | -2.267E-01 | 0.000E+00 |
| Chr11 | 845108   | 845274   | 24  | 1.887E-01 | 4.447E-01 | 2.560E-01  | 9.076E-04 |
| Chr11 | 1166494  | 1166989  | 96  | 4.223E-01 | 5.764E-01 | 1.542E-01  | 2.038E-04 |
| Chr11 | 1397106  | 1397593  | 122 | 2.283E-01 | 3.386E-01 | 1.104E-01  | 2.114E-04 |
| Chr11 | 1401431  | 1401910  | 79  | 4.334E-01 | 3.195E-01 | -1.139E-01 | 1.780E-05 |
| Chr11 | 1604627  | 1605123  | 197 | 3.654E-01 | 2.253E-01 | -1.400E-01 | 1.516E-04 |
| Chr11 | 1612117  | 1612596  | 127 | 2.948E-01 | 1.648E-01 | -1.301E-01 | 4.603E-04 |
| Chr11 | 1694961  | 1695441  | 151 | 3.176E-01 | 1.506E-01 | -1.671E-01 | 1.323E-02 |
| Chr11 | 1912547  | 1913004  | 81  | 3.707E-01 | 2.489E-01 | -1.217E-01 | 2.245E-04 |
| Chr11 | 1915768  | 1916019  | 73  | 3.112E-01 | 1.423E-01 | -1.689E-01 | 2.000E-07 |
| Chr11 | 1916023  | 1916272  | 33  | 2.450E-01 | 9.333E-02 | -1.517E-01 | 2.670E-05 |
| Chr11 | 1948153  | 1948256  | 22  | 1.163E-01 | 1.097E-02 | -1.053E-01 | 3.210E-03 |
| Chr11 | 2084404  | 2084897  | 171 | 2.222E-01 | 7.734E-02 | -1.449E-01 | 4.493E-02 |

|       |          |          |     |           |           |            |           |
|-------|----------|----------|-----|-----------|-----------|------------|-----------|
| Chr11 | 2212832  | 2213325  | 178 | 2.503E-01 | 1.337E-01 | -1.166E-01 | 7.732E-03 |
| Chr11 | 2234039  | 2234494  | 79  | 4.591E-01 | 3.567E-01 | -1.025E-01 | 2.330E-03 |
| Chr11 | 2369792  | 2370285  | 169 | 3.525E-01 | 2.444E-01 | -1.081E-01 | 7.234E-03 |
| Chr11 | 3171423  | 3171909  | 98  | 2.638E-01 | 1.347E-01 | -1.291E-01 | 5.939E-04 |
| Chr11 | 3394119  | 3394613  | 74  | 2.777E-01 | 1.656E-01 | -1.120E-01 | 7.915E-04 |
| Chr11 | 3477525  | 3478019  | 214 | 2.574E-01 | 1.475E-01 | -1.099E-01 | 4.399E-02 |
| Chr11 | 3539432  | 3539931  | 42  | 5.380E-01 | 4.314E-01 | -1.067E-01 | 8.909E-03 |
| Chr11 | 3863091  | 3863550  | 126 | 2.467E-01 | 1.411E-01 | -1.056E-01 | 2.794E-03 |
| Chr11 | 3970586  | 3971077  | 73  | 3.541E-01 | 2.259E-01 | -1.282E-01 | 8.454E-04 |
| Chr11 | 4387216  | 4387701  | 171 | 3.261E-01 | 1.862E-01 | -1.400E-01 | 8.500E-06 |
| Chr11 | 4428115  | 4428395  | 37  | 4.562E-01 | 3.416E-01 | -1.146E-01 | 1.730E-04 |
| Chr11 | 5271848  | 5272345  | 172 | 3.601E-01 | 2.591E-01 | -1.009E-01 | 0.000E+00 |
| Chr11 | 6337243  | 6337635  | 106 | 3.133E-01 | 2.122E-01 | -1.011E-01 | 2.757E-02 |
| Chr11 | 6353484  | 6353963  | 216 | 3.293E-01 | 2.071E-01 | -1.222E-01 | 1.378E-02 |
| Chr11 | 6866983  | 6867480  | 170 | 3.884E-01 | 2.410E-01 | -1.474E-01 | 4.310E-02 |
| Chr11 | 7130857  | 7131345  | 212 | 1.603E-01 | 5.567E-02 | -1.046E-01 | 7.855E-03 |
| Chr11 | 7211609  | 7212097  | 120 | 4.674E-01 | 3.286E-01 | -1.388E-01 | 6.000E-07 |
| Chr11 | 7350316  | 7350809  | 170 | 1.930E-01 | 8.873E-02 | -1.042E-01 | 9.416E-04 |
| Chr11 | 7539068  | 7539561  | 228 | 2.019E-01 | 9.372E-02 | -1.081E-01 | 4.093E-02 |
| Chr11 | 7820801  | 7821278  | 174 | 3.715E-01 | 2.599E-01 | -1.115E-01 | 2.760E-05 |
| Chr11 | 7826267  | 7826763  | 186 | 1.895E-01 | 8.478E-02 | -1.047E-01 | 4.410E-02 |
| Chr11 | 7930175  | 7930667  | 118 | 2.251E-01 | 1.064E-01 | -1.186E-01 | 7.560E-03 |
| Chr11 | 8076910  | 8077389  | 63  | 3.868E-01 | 2.505E-01 | -1.363E-01 | 3.230E-05 |
| Chr11 | 8152356  | 8152846  | 111 | 4.552E-01 | 3.448E-01 | -1.103E-01 | 1.098E-03 |
| Chr11 | 9235171  | 9235564  | 118 | 2.319E-01 | 3.820E-02 | -1.937E-01 | 0.000E+00 |
| Chr11 | 9253108  | 9253589  | 85  | 1.618E-01 | 4.924E-02 | -1.125E-01 | 2.464E-02 |
| Chr11 | 9963898  | 9964387  | 184 | 2.402E-01 | 1.306E-01 | -1.096E-01 | 1.500E-06 |
| Chr11 | 10187815 | 10187902 | 11  | 4.929E-01 | 2.804E-01 | -2.125E-01 | 2.598E-02 |
| Chr11 | 10212038 | 10212518 | 128 | 4.633E-01 | 3.536E-01 | -1.097E-01 | 9.978E-04 |
| Chr11 | 10308266 | 10308664 | 69  | 3.958E-01 | 2.878E-01 | -1.080E-01 | 5.000E-07 |
| Chr11 | 10440832 | 10441315 | 180 | 1.091E-01 | 6.191E-03 | -1.029E-01 | 1.809E-02 |
| Chr11 | 10538497 | 10538992 | 185 | 4.119E-01 | 2.485E-01 | -1.635E-01 | 0.000E+00 |
| Chr11 | 10812973 | 10813460 | 150 | 2.960E-01 | 1.876E-01 | -1.084E-01 | 0.000E+00 |
| Chr11 | 11222010 | 11222505 | 137 | 4.525E-01 | 3.515E-01 | -1.010E-01 | 4.721E-03 |
| Chr11 | 11263386 | 11263876 | 134 | 2.703E-01 | 1.685E-01 | -1.018E-01 | 2.429E-02 |
| Chr11 | 11468359 | 11468857 | 138 | 3.187E-01 | 2.132E-01 | -1.055E-01 | 2.100E-06 |
| Chr11 | 11471357 | 11471834 | 143 | 3.557E-01 | 2.408E-01 | -1.149E-01 | 0.000E+00 |
| Chr11 | 11686234 | 11686728 | 158 | 3.477E-01 | 2.470E-01 | -1.008E-01 | 1.862E-03 |
| Chr11 | 11795113 | 11795602 | 92  | 3.190E-01 | 2.083E-01 | -1.106E-01 | 3.472E-03 |
| Chr11 | 12125579 | 12126070 | 146 | 2.965E-01 | 1.644E-01 | -1.321E-01 | 4.400E-06 |
| Chr11 | 12205879 | 12206371 | 165 | 2.554E-01 | 1.412E-01 | -1.142E-01 | 2.434E-03 |
| Chr11 | 12214839 | 12215332 | 124 | 2.475E-01 | 1.057E-01 | -1.418E-01 | 1.465E-02 |
| Chr11 | 12696201 | 12696694 | 145 | 4.333E-01 | 3.113E-01 | -1.220E-01 | 0.000E+00 |
| Chr11 | 12986063 | 12986560 | 131 | 3.436E-01 | 2.118E-01 | -1.318E-01 | 2.660E-05 |
| Chr11 | 13054628 | 13055103 | 110 | 1.392E-01 | 3.078E-02 | -1.084E-01 | 9.250E-04 |
| Chr11 | 13149516 | 13150007 | 172 | 3.030E-01 | 1.439E-01 | -1.590E-01 | 1.002E-03 |
| Chr11 | 13153981 | 13154476 | 182 | 3.760E-01 | 1.360E-01 | -2.400E-01 | 1.000E-06 |

|       |          |          |     |           |           |            |           |
|-------|----------|----------|-----|-----------|-----------|------------|-----------|
| Chr11 | 13218325 | 13218738 | 73  | 1.612E-01 | 4.267E-01 | 2.654E-01  | 1.303E-03 |
| Chr11 | 13264631 | 13264694 | 14  | 2.308E-01 | 1.198E-01 | -1.110E-01 | 2.935E-02 |
| Chr11 | 13268973 | 13269434 | 126 | 3.618E-01 | 2.564E-01 | -1.054E-01 | 2.000E-06 |
| Chr11 | 13548931 | 13549413 | 206 | 3.211E-01 | 2.180E-01 | -1.031E-01 | 7.087E-04 |
| Chr12 | 17987    | 18466    | 80  | 3.603E-01 | 4.657E-01 | 1.054E-01  | 3.585E-02 |
| Chr12 | 185033   | 185530   | 151 | 2.492E-01 | 1.254E-01 | -1.238E-01 | 3.596E-02 |
| Chr12 | 326259   | 326752   | 87  | 3.347E-01 | 2.247E-01 | -1.099E-01 | 7.963E-03 |
| Chr12 | 405804   | 406251   | 122 | 3.585E-01 | 2.409E-01 | -1.176E-01 | 0.000E+00 |
| Chr12 | 467695   | 468184   | 185 | 3.856E-03 | 1.417E-01 | 1.378E-01  | 3.884E-03 |
| Chr12 | 487942   | 488434   | 171 | 7.516E-02 | 1.998E-01 | 1.246E-01  | 1.082E-02 |
| Chr12 | 503356   | 503623   | 78  | 3.119E-01 | 2.075E-01 | -1.044E-01 | 3.321E-03 |
| Chr12 | 530453   | 530934   | 155 | 1.214E-01 | 1.743E-02 | -1.040E-01 | 2.540E-05 |
| Chr12 | 737566   | 738064   | 202 | 3.991E-01 | 2.636E-01 | -1.355E-01 | 4.183E-03 |
| Chr12 | 879908   | 880402   | 162 | 3.639E-01 | 2.582E-01 | -1.056E-01 | 9.297E-03 |
| Chr12 | 1308513  | 1309008  | 167 | 5.885E-01 | 4.629E-01 | -1.256E-01 | 3.238E-03 |
| Chr12 | 1636641  | 1637138  | 164 | 3.831E-01 | 1.914E-01 | -1.917E-01 | 1.346E-02 |
| Chr12 | 2003113  | 2003236  | 38  | 3.636E-01 | 2.354E-01 | -1.282E-01 | 3.902E-02 |
| Chr12 | 2817518  | 2818014  | 168 | 2.153E-01 | 1.015E-01 | -1.138E-01 | 1.488E-02 |
| Chr12 | 2976871  | 2977285  | 80  | 3.805E-01 | 2.605E-01 | -1.199E-01 | 2.534E-03 |
| Chr12 | 3421683  | 3421788  | 28  | 2.637E-01 | 1.324E-01 | -1.314E-01 | 1.615E-03 |
| Chr12 | 3478617  | 3479017  | 148 | 4.289E-01 | 2.147E-01 | -2.142E-01 | 1.315E-03 |
| Chr12 | 3616674  | 3617170  | 210 | 2.790E-01 | 1.715E-01 | -1.076E-01 | 2.378E-03 |
| Chr12 | 3925822  | 3926281  | 172 | 2.934E-01 | 1.756E-01 | -1.178E-01 | 1.164E-04 |
| Chr12 | 3976116  | 3976607  | 147 | 3.444E-01 | 2.208E-01 | -1.236E-01 | 0.000E+00 |
| Chr12 | 4238473  | 4238653  | 30  | 7.335E-02 | 2.203E-01 | 1.470E-01  | 6.651E-04 |
| Chr12 | 4395398  | 4395896  | 150 | 4.056E-01 | 3.020E-01 | -1.036E-01 | 1.378E-04 |
| Chr12 | 4438803  | 4439288  | 152 | 3.313E-01 | 2.310E-01 | -1.004E-01 | 2.000E-07 |
| Chr12 | 4824194  | 4824623  | 37  | 1.542E-01 | 2.699E-01 | 1.157E-01  | 3.010E-05 |
| Chr12 | 5387365  | 5387857  | 189 | 2.582E-01 | 1.227E-01 | -1.356E-01 | 4.188E-02 |
| Chr12 | 5747217  | 5747629  | 86  | 7.505E-01 | 5.698E-01 | -1.807E-01 | 4.054E-04 |
| Chr12 | 6080715  | 6081142  | 151 | 7.034E-01 | 5.570E-01 | -1.464E-01 | 5.042E-03 |
| Chr12 | 6085463  | 6085950  | 133 | 4.997E-01 | 6.797E-01 | 1.800E-01  | 4.905E-02 |
| Chr12 | 6097211  | 6097690  | 188 | 5.835E-01 | 6.902E-01 | 1.067E-01  | 5.625E-03 |
| Chr12 | 6108797  | 6109233  | 110 | 6.302E-01 | 7.521E-01 | 1.219E-01  | 6.888E-04 |
| Chr12 | 6109696  | 6110057  | 95  | 5.535E-01 | 6.899E-01 | 1.364E-01  | 2.956E-03 |
| Chr12 | 6112425  | 6112864  | 154 | 6.600E-01 | 5.304E-01 | -1.296E-01 | 2.355E-02 |
| Chr12 | 6122762  | 6123207  | 88  | 6.783E-01 | 8.091E-01 | 1.308E-01  | 2.220E-05 |
| Chr12 | 6125074  | 6125385  | 93  | 5.546E-01 | 7.010E-01 | 1.464E-01  | 3.026E-02 |
| Chr12 | 6134534  | 6134873  | 34  | 5.269E-01 | 7.602E-01 | 2.332E-01  | 1.221E-03 |
| Chr12 | 6173877  | 6174212  | 101 | 6.680E-01 | 7.991E-01 | 1.312E-01  | 1.494E-02 |
| Chr12 | 6960341  | 6960835  | 169 | 3.412E-01 | 2.338E-01 | -1.074E-01 | 9.000E-07 |
| Chr12 | 6963813  | 6964307  | 208 | 4.395E-01 | 2.921E-01 | -1.473E-01 | 1.349E-02 |
| Chr12 | 7367417  | 7367904  | 243 | 2.339E-01 | 1.132E-01 | -1.206E-01 | 4.313E-02 |
| Chr12 | 7500488  | 7500984  | 177 | 4.153E-01 | 2.752E-01 | -1.401E-01 | 6.137E-03 |
| Chr12 | 7539905  | 7540383  | 179 | 2.443E-01 | 1.425E-01 | -1.018E-01 | 2.022E-04 |
| Chr12 | 7672617  | 7673101  | 168 | 2.784E-01 | 4.091E-01 | 1.307E-01  | 7.818E-03 |
| Chr12 | 7746011  | 7746505  | 200 | 1.739E-01 | 3.063E-01 | 1.323E-01  | 6.060E-05 |

|       |          |          |     |           |           |            |           |
|-------|----------|----------|-----|-----------|-----------|------------|-----------|
| Chr12 | 8060861  | 8061354  | 171 | 2.265E-01 | 1.131E-01 | -1.134E-01 | 5.774E-04 |
| Chr12 | 8287259  | 8287748  | 175 | 2.504E-01 | 5.648E-02 | -1.939E-01 | 7.275E-03 |
| Chr12 | 8817958  | 8818451  | 117 | 2.586E-01 | 9.370E-02 | -1.649E-01 | 1.542E-02 |
| Chr12 | 9071728  | 9072226  | 162 | 2.528E-01 | 7.281E-02 | -1.800E-01 | 4.196E-03 |
| Chr12 | 9100721  | 9101220  | 141 | 3.367E-01 | 1.919E-01 | -1.448E-01 | 1.893E-03 |
| Chr12 | 9103266  | 9103719  | 142 | 1.850E-01 | 7.444E-02 | -1.105E-01 | 7.885E-04 |
| Chr12 | 9192112  | 9192184  | 10  | 4.350E-01 | 2.382E-01 | -1.969E-01 | 3.393E-02 |
| Chr12 | 9217228  | 9217669  | 71  | 3.293E-01 | 2.153E-01 | -1.140E-01 | 1.763E-03 |
| Chr12 | 9218729  | 9219045  | 45  | 4.459E-01 | 2.999E-01 | -1.461E-01 | 3.219E-03 |
| Chr12 | 9270053  | 9270530  | 165 | 2.298E-01 | 1.198E-01 | -1.100E-01 | 1.404E-03 |
| Chr12 | 9384274  | 9384738  | 167 | 2.031E-01 | 1.015E-01 | -1.017E-01 | 3.447E-02 |
| Chr12 | 9620960  | 9621456  | 178 | 1.959E-01 | 8.880E-02 | -1.072E-01 | 3.341E-02 |
| Chr12 | 9682885  | 9683374  | 186 | 2.957E-01 | 1.459E-01 | -1.498E-01 | 2.494E-02 |
| Chr12 | 9705465  | 9705943  | 127 | 2.173E-01 | 1.082E-01 | -1.091E-01 | 2.100E-03 |
| Chr12 | 9800124  | 9800617  | 172 | 1.889E-01 | 3.493E-01 | 1.605E-01  | 3.984E-02 |
| Chr12 | 9868284  | 9868755  | 88  | 3.186E-01 | 1.998E-01 | -1.187E-01 | 1.126E-04 |
| Chr12 | 10122473 | 10122961 | 93  | 3.297E-01 | 2.282E-01 | -1.015E-01 | 1.800E-06 |
| Chr12 | 10339017 | 10339113 | 23  | 3.672E-01 | 2.040E-01 | -1.632E-01 | 1.586E-03 |
| Chr12 | 10416247 | 10416549 | 49  | 4.796E-01 | 1.665E-01 | -3.131E-01 | 0.000E+00 |
| Chr12 | 10539817 | 10540298 | 95  | 6.045E-01 | 3.811E-01 | -2.234E-01 | 0.000E+00 |
| Chr13 | 49863    | 50359    | 241 | 2.638E-01 | 1.619E-01 | -1.019E-01 | 2.066E-02 |
| Chr13 | 103252   | 103722   | 142 | 2.703E-01 | 1.628E-01 | -1.075E-01 | 1.000E-07 |
| Chr13 | 571800   | 572294   | 164 | 4.654E-01 | 3.270E-01 | -1.384E-01 | 4.332E-03 |
| Chr13 | 876133   | 876612   | 136 | 3.181E-01 | 1.644E-01 | -1.537E-01 | 2.114E-02 |
| Chr13 | 950663   | 950813   | 21  | 2.024E-01 | 5.741E-02 | -1.450E-01 | 2.539E-03 |
| Chr13 | 967965   | 968324   | 49  | 4.255E-01 | 3.138E-01 | -1.117E-01 | 1.366E-03 |
| Chr13 | 981777   | 982188   | 124 | 1.723E-01 | 6.643E-02 | -1.059E-01 | 7.180E-05 |
| Chr13 | 1029688  | 1029974  | 46  | 2.009E-01 | 6.635E-02 | -1.346E-01 | 1.977E-03 |
| Chr13 | 1098135  | 1098467  | 70  | 2.121E-01 | 1.065E-01 | -1.056E-01 | 1.473E-03 |
| Chr13 | 1847093  | 1847589  | 152 | 4.797E-01 | 3.708E-01 | -1.089E-01 | 7.270E-03 |
| Chr13 | 2083719  | 2084215  | 164 | 4.382E-01 | 3.347E-01 | -1.035E-01 | 1.693E-02 |
| Chr13 | 2626507  | 2627001  | 148 | 2.331E-01 | 1.292E-01 | -1.039E-01 | 7.627E-03 |
| Chr13 | 2658529  | 2658908  | 71  | 2.131E-01 | 8.624E-02 | -1.269E-01 | 1.837E-02 |
| Chr13 | 2734628  | 2735122  | 122 | 3.545E-01 | 2.353E-01 | -1.192E-01 | 6.000E-07 |
| Chr13 | 3161973  | 3162058  | 26  | 1.973E-01 | 3.658E-01 | 1.685E-01  | 3.355E-03 |
| Chr13 | 3348631  | 3348847  | 20  | 2.427E-01 | 1.336E-01 | -1.091E-01 | 3.154E-03 |
| Chr13 | 3534868  | 3535351  | 190 | 3.143E-01 | 2.130E-01 | -1.013E-01 | 4.900E-06 |
| Chr13 | 3996177  | 3996662  | 113 | 3.222E-01 | 2.065E-01 | -1.157E-01 | 3.361E-03 |
| Chr13 | 4932444  | 4932934  | 120 | 5.026E-01 | 3.923E-01 | -1.103E-01 | 8.050E-05 |
| Chr13 | 5278542  | 5279036  | 173 | 2.258E-01 | 1.232E-01 | -1.026E-01 | 1.237E-03 |
| Chr13 | 5807421  | 5807529  | 26  | 4.626E-01 | 2.873E-01 | -1.753E-01 | 4.311E-04 |
| Chr13 | 5924924  | 5925421  | 96  | 2.401E-01 | 3.954E-01 | 1.553E-01  | 1.504E-04 |
| Chr13 | 6619343  | 6619827  | 199 | 2.672E-01 | 1.504E-01 | -1.168E-01 | 1.127E-02 |
| Chr13 | 6798274  | 6798377  | 19  | 1.683E-01 | 3.541E-02 | -1.329E-01 | 3.583E-02 |
| Chr13 | 6953141  | 6953624  | 58  | 2.586E-01 | 1.028E-01 | -1.558E-01 | 7.370E-03 |
| Chr13 | 7032374  | 7032824  | 117 | 4.287E-01 | 3.233E-01 | -1.054E-01 | 1.417E-02 |
| Chr13 | 7060168  | 7060319  | 26  | 1.466E-01 | 3.657E-02 | -1.100E-01 | 1.010E-05 |

|       |          |          |     |           |           |            |           |
|-------|----------|----------|-----|-----------|-----------|------------|-----------|
| Chr13 | 7121640  | 7122021  | 85  | 1.159E-01 | 2.186E-01 | 1.027E-01  | 0.000E+00 |
| Chr13 | 7538924  | 7539398  | 141 | 5.922E-01 | 4.757E-01 | -1.165E-01 | 4.253E-02 |
| Chr13 | 7550026  | 7550409  | 106 | 5.689E-01 | 4.644E-01 | -1.045E-01 | 1.862E-02 |
| Chr13 | 7559009  | 7559461  | 157 | 4.099E-01 | 5.123E-01 | 1.024E-01  | 2.400E-02 |
| Chr13 | 7561426  | 7561916  | 173 | 4.613E-01 | 6.117E-01 | 1.504E-01  | 3.100E-05 |
| Chr13 | 7567027  | 7567108  | 34  | 5.245E-01 | 3.656E-01 | -1.590E-01 | 4.072E-02 |
| Chr13 | 7579883  | 7580366  | 159 | 4.860E-01 | 6.879E-01 | 2.019E-01  | 2.080E-03 |
| Chr13 | 7584536  | 7584997  | 213 | 5.433E-01 | 4.038E-01 | -1.395E-01 | 5.417E-03 |
| Chr13 | 7587117  | 7587576  | 163 | 3.756E-01 | 5.146E-01 | 1.389E-01  | 8.606E-03 |
| Chr13 | 7599037  | 7599531  | 108 | 3.509E-01 | 2.322E-01 | -1.187E-01 | 2.822E-04 |
| Chr13 | 8281641  | 8282135  | 112 | 5.636E-01 | 4.612E-01 | -1.024E-01 | 3.532E-02 |
| Chr13 | 9243428  | 9243494  | 26  | 3.795E-01 | 2.428E-01 | -1.367E-01 | 3.750E-02 |
| Chr13 | 9244649  | 9245141  | 149 | 5.915E-01 | 4.776E-01 | -1.139E-01 | 1.670E-05 |
| Chr13 | 9452160  | 9452320  | 28  | 3.635E-01 | 2.004E-01 | -1.632E-01 | 2.834E-04 |
| Chr13 | 10158014 | 10158493 | 106 | 2.140E-01 | 1.009E-01 | -1.131E-01 | 1.593E-03 |
| Chr13 | 10578889 | 10579094 | 48  | 2.650E-01 | 3.764E-01 | 1.114E-01  | 3.968E-03 |
| Chr13 | 11455599 | 11456065 | 165 | 3.960E-01 | 2.930E-01 | -1.030E-01 | 1.079E-02 |
| Chr13 | 11930945 | 11931396 | 118 | 2.315E-01 | 1.290E-01 | -1.024E-01 | 2.000E-07 |
| Chr13 | 12186505 | 12186994 | 188 | 3.913E-01 | 2.910E-01 | -1.002E-01 | 1.920E-05 |
| Chr13 | 12332032 | 12332516 | 131 | 4.669E-01 | 3.233E-01 | -1.435E-01 | 1.795E-04 |
| Chr13 | 12442322 | 12442814 | 189 | 2.624E-01 | 1.588E-01 | -1.036E-01 | 3.755E-02 |
| Chr13 | 12534082 | 12534562 | 187 | 1.445E-01 | 6.658E-03 | -1.378E-01 | 1.592E-03 |
| Chr13 | 12776276 | 12776768 | 197 | 2.602E-01 | 1.318E-01 | -1.284E-01 | 1.009E-02 |
| Chr13 | 13169032 | 13169517 | 86  | 4.736E-01 | 3.501E-01 | -1.235E-01 | 1.268E-04 |
| Chr13 | 13275778 | 13276185 | 82  | 2.395E-01 | 3.844E-01 | 1.449E-01  | 1.664E-02 |
| Chr13 | 13368941 | 13369434 | 151 | 2.369E-01 | 1.176E-01 | -1.193E-01 | 2.149E-02 |
| Chr13 | 13523424 | 13523910 | 156 | 4.350E-01 | 2.861E-01 | -1.489E-01 | 1.617E-02 |
| Chr13 | 13855378 | 13855870 | 117 | 2.818E-01 | 1.515E-01 | -1.303E-01 | 1.555E-03 |
| Chr13 | 13878281 | 13878771 | 169 | 4.123E-01 | 3.061E-01 | -1.062E-01 | 2.328E-02 |
| Chr13 | 14559035 | 14559527 | 146 | 3.630E-01 | 2.298E-01 | -1.332E-01 | 2.830E-05 |
| Chr13 | 14603294 | 14603785 | 188 | 3.276E-01 | 2.027E-01 | -1.249E-01 | 4.700E-06 |
| Chr14 | 450834   | 451329   | 160 | 4.757E-01 | 3.742E-01 | -1.016E-01 | 4.940E-05 |
| Chr14 | 497390   | 497765   | 102 | 2.951E-01 | 1.756E-01 | -1.196E-01 | 8.378E-03 |
| Chr14 | 513060   | 513545   | 185 | 2.676E-01 | 1.429E-01 | -1.247E-01 | 9.238E-03 |
| Chr14 | 851673   | 851832   | 26  | 1.851E-01 | 6.333E-02 | -1.217E-01 | 4.686E-04 |
| Chr14 | 1000734  | 1001224  | 110 | 3.159E-01 | 4.476E-01 | 1.318E-01  | 2.702E-03 |
| Chr14 | 1282755  | 1283241  | 185 | 4.050E-01 | 2.406E-01 | -1.643E-01 | 7.581E-04 |
| Chr14 | 1463352  | 1463719  | 120 | 3.881E-01 | 2.834E-01 | -1.047E-01 | 3.625E-04 |
| Chr14 | 1464279  | 1464624  | 57  | 1.205E-01 | 4.364E-04 | -1.201E-01 | 4.000E-07 |
| Chr14 | 1721057  | 1721539  | 88  | 3.244E-01 | 1.738E-01 | -1.506E-01 | 9.187E-04 |
| Chr14 | 1858292  | 1858789  | 116 | 5.340E-01 | 3.504E-01 | -1.836E-01 | 2.060E-05 |
| Chr14 | 1903563  | 1904058  | 90  | 3.082E-01 | 2.012E-01 | -1.070E-01 | 5.463E-03 |
| Chr14 | 1920961  | 1921441  | 74  | 1.434E-01 | 1.621E-04 | -1.433E-01 | 5.108E-03 |
| Chr14 | 1922419  | 1922890  | 105 | 2.497E-01 | 8.549E-02 | -1.642E-01 | 5.300E-06 |
| Chr14 | 2432434  | 2432911  | 141 | 3.038E-01 | 2.038E-01 | -1.001E-01 | 1.904E-04 |
| Chr14 | 2744526  | 2745013  | 161 | 4.026E-01 | 2.928E-01 | -1.098E-01 | 1.120E-05 |
| Chr14 | 3102628  | 3103114  | 149 | 2.535E-01 | 1.447E-01 | -1.088E-01 | 4.708E-02 |

|        |          |          |     |           |           |            |           |
|--------|----------|----------|-----|-----------|-----------|------------|-----------|
| Chr14  | 3864110  | 3864593  | 186 | 3.506E-01 | 2.119E-01 | -1.387E-01 | 2.700E-06 |
| Chr14  | 3995780  | 3996270  | 173 | 2.139E-01 | 1.095E-01 | -1.044E-01 | 3.190E-05 |
| Chr14  | 4230527  | 4231024  | 172 | 4.685E-01 | 2.417E-01 | -2.269E-01 | 2.800E-06 |
| Chr14  | 5618935  | 5619056  | 21  | 3.077E-01 | 1.677E-01 | -1.400E-01 | 1.034E-02 |
| Chr14  | 5890579  | 5891078  | 150 | 4.244E-01 | 3.178E-01 | -1.066E-01 | 6.502E-04 |
| Chr14  | 5954816  | 5955312  | 162 | 2.882E-01 | 1.748E-01 | -1.134E-01 | 2.900E-06 |
| Chr14  | 7531593  | 7532088  | 138 | 3.187E-01 | 1.989E-01 | -1.198E-01 | 1.678E-03 |
| Chr14  | 7842065  | 7842527  | 136 | 2.855E-01 | 1.840E-01 | -1.015E-01 | 3.041E-04 |
| Chr14  | 8098519  | 8099016  | 187 | 4.808E-01 | 3.523E-01 | -1.285E-01 | 8.969E-04 |
| Chr14  | 8149974  | 8150472  | 147 | 3.435E-01 | 2.380E-01 | -1.055E-01 | 0.000E+00 |
| Chr14  | 8824377  | 8824866  | 99  | 3.555E-01 | 1.295E-01 | -2.260E-01 | 6.238E-04 |
| Chr14  | 9026075  | 9026567  | 238 | 2.653E-01 | 1.392E-01 | -1.261E-01 | 3.000E-07 |
| Chr14  | 10473676 | 10474107 | 100 | 3.364E-01 | 2.177E-01 | -1.187E-01 | 0.000E+00 |
| Chr14  | 10521281 | 10521737 | 59  | 4.386E-01 | 3.382E-01 | -1.004E-01 | 3.110E-05 |
| Chr14  | 10524333 | 10524776 | 76  | 2.084E-01 | 9.938E-02 | -1.091E-01 | 7.344E-04 |
| Chr15W | 2396483  | 2396968  | 149 | 3.408E-01 | 2.107E-01 | -1.301E-01 | 1.544E-04 |
| Chr15W | 2660329  | 2660819  | 83  | 1.463E-01 | 2.737E-01 | 1.274E-01  | 1.100E-06 |
| Chr15W | 2758897  | 2759390  | 173 | 2.639E-01 | 1.397E-01 | -1.241E-01 | 3.317E-02 |
| Chr15W | 2769843  | 2770340  | 185 | 5.163E-02 | 1.576E-01 | 1.059E-01  | 1.800E-06 |
| Chr15W | 2792741  | 2793235  | 132 | 4.257E-01 | 3.128E-01 | -1.129E-01 | 1.966E-04 |
| Chr15W | 2800209  | 2800701  | 132 | 6.173E-01 | 3.985E-01 | -2.188E-01 | 2.472E-03 |
| Chr15W | 2848244  | 2848718  | 171 | 3.552E-01 | 2.056E-01 | -1.496E-01 | 3.020E-05 |
| Chr15W | 2860662  | 2861122  | 110 | 2.020E-01 | 7.168E-02 | -1.303E-01 | 3.400E-06 |
| Chr15W | 2908969  | 2909463  | 167 | 4.114E-02 | 1.696E-01 | 1.285E-01  | 1.000E-07 |
| Chr15W | 2916455  | 2916949  | 163 | 9.807E-02 | 2.108E-01 | 1.127E-01  | 2.700E-02 |
| Chr15W | 2918456  | 2918946  | 150 | 2.586E-01 | 3.973E-01 | 1.387E-01  | 4.089E-04 |
| Chr15W | 2921948  | 2922410  | 112 | 3.304E-02 | 1.556E-01 | 1.225E-01  | 1.200E-06 |
| Chr15W | 2958589  | 2959086  | 150 | 4.498E-02 | 1.779E-01 | 1.329E-01  | 1.226E-03 |
| Chr15W | 2959093  | 2959584  | 182 | 1.810E-02 | 1.249E-01 | 1.068E-01  | 1.538E-03 |
| Chr15W | 2984027  | 2984515  | 150 | 1.114E-01 | 2.538E-01 | 1.425E-01  | 1.406E-02 |
| Chr15W | 2988507  | 2989003  | 167 | 3.282E-02 | 1.495E-01 | 1.166E-01  | 0.000E+00 |
| Chr15W | 2992995  | 2993493  | 161 | 5.241E-02 | 3.203E-01 | 2.679E-01  | 0.000E+00 |
| Chr15W | 3063283  | 3063757  | 132 | 2.824E-01 | 4.109E-01 | 1.285E-01  | 3.958E-02 |
| Chr15W | 3074696  | 3075181  | 113 | 1.880E-01 | 2.901E-01 | 1.021E-01  | 2.270E-05 |
| Chr15W | 3105311  | 3105793  | 149 | 4.361E-01 | 1.553E-01 | -2.808E-01 | 2.000E-07 |
| Chr15W | 3106313  | 3106807  | 168 | 1.808E-01 | 5.153E-03 | -1.756E-01 | 3.156E-02 |
| Chr15W | 3109305  | 3109804  | 149 | 6.192E-02 | 1.864E-01 | 1.245E-01  | 1.260E-02 |
| Chr15W | 3118796  | 3119290  | 115 | 3.247E-01 | 2.046E-01 | -1.201E-01 | 5.470E-04 |
| Chr15W | 3119291  | 3119789  | 150 | 2.927E-01 | 1.815E-01 | -1.113E-01 | 2.461E-02 |
| Chr15W | 3154019  | 3154496  | 120 | 3.646E-01 | 2.514E-01 | -1.132E-01 | 1.700E-06 |
| Chr15W | 3166724  | 3167208  | 128 | 2.936E-01 | 1.685E-01 | -1.252E-01 | 8.790E-05 |
| Chr15W | 3180229  | 3180674  | 143 | 5.266E-01 | 4.255E-01 | -1.011E-01 | 2.102E-02 |
| Chr15W | 3181132  | 3181581  | 64  | 3.982E-01 | 2.706E-01 | -1.276E-01 | 1.871E-03 |
| Chr15W | 3229846  | 3230312  | 105 | 2.696E-01 | 1.598E-01 | -1.098E-01 | 3.214E-04 |
| Chr15W | 3274169  | 3274639  | 157 | 5.799E-02 | 1.698E-01 | 1.118E-01  | 4.843E-02 |
| Chr15W | 3321196  | 3321677  | 156 | 4.362E-01 | 3.306E-01 | -1.057E-01 | 7.003E-03 |
| Chr15W | 3377304  | 3377795  | 129 | 3.578E-01 | 2.359E-01 | -1.219E-01 | 6.508E-04 |

|        |         |         |     |           |           |            |           |
|--------|---------|---------|-----|-----------|-----------|------------|-----------|
| Chr15W | 3405140 | 3405626 | 86  | 3.733E-01 | 2.592E-01 | -1.141E-01 | 5.000E-07 |
| Chr15W | 3417635 | 3418085 | 112 | 5.069E-01 | 1.899E-01 | -3.170E-01 | 1.600E-06 |
| Chr15W | 3463507 | 3463942 | 157 | 3.492E-01 | 2.252E-01 | -1.240E-01 | 8.234E-03 |
| Chr15W | 3474974 | 3475442 | 161 | 3.834E-01 | 2.524E-01 | -1.310E-01 | 5.000E-07 |
| Chr15W | 3479239 | 3479706 | 190 | 5.223E-01 | 4.062E-01 | -1.160E-01 | 0.000E+00 |
| Chr15W | 3522873 | 3523284 | 152 | 3.537E-01 | 2.333E-01 | -1.204E-01 | 7.887E-03 |
| Chr15W | 3535011 | 3535447 | 70  | 3.110E-01 | 1.549E-01 | -1.561E-01 | 4.618E-02 |
| Chr15W | 3549225 | 3549707 | 173 | 4.355E-01 | 1.555E-01 | -2.801E-01 | 8.876E-03 |
| Chr15W | 3555697 | 3556194 | 165 | 3.781E-01 | 2.399E-01 | -1.382E-01 | 7.997E-04 |
| Chr15W | 3573351 | 3573776 | 143 | 2.732E-01 | 1.532E-01 | -1.200E-01 | 4.114E-02 |
| Chr15W | 3595631 | 3596111 | 99  | 4.126E-01 | 2.242E-01 | -1.884E-01 | 0.000E+00 |
| Chr15W | 3603440 | 3603796 | 98  | 2.163E-01 | 4.006E-01 | 1.843E-01  | 1.798E-02 |
| Chr15W | 3658477 | 3658970 | 125 | 2.304E-02 | 1.503E-01 | 1.273E-01  | 9.000E-07 |
| Chr15W | 3660965 | 3661459 | 178 | 1.564E-01 | 3.965E-02 | -1.168E-01 | 1.510E-02 |
| Chr15W | 3661463 | 3661954 | 198 | 2.181E-01 | 9.341E-02 | -1.246E-01 | 9.670E-04 |
| Chr15W | 3667416 | 3667874 | 149 | 1.359E-01 | 1.288E-02 | -1.230E-01 | 3.788E-02 |
| Chr15W | 3678478 | 3678952 | 114 | 1.189E-01 | 2.411E-01 | 1.222E-01  | 1.492E-02 |
| Chr15W | 3712268 | 3712761 | 167 | 6.443E-02 | 1.954E-01 | 1.310E-01  | 3.417E-03 |
| Chr15W | 3746099 | 3746581 | 106 | 2.835E-01 | 4.609E-01 | 1.774E-01  | 1.320E-05 |
| Chr15W | 3750496 | 3750982 | 141 | 2.607E-01 | 1.592E-01 | -1.015E-01 | 2.615E-02 |
| Chr15W | 3771126 | 3771607 | 186 | 3.470E-01 | 2.289E-01 | -1.180E-01 | 3.874E-02 |
| Chr15W | 3779386 | 3779862 | 200 | 4.394E-01 | 3.074E-01 | -1.319E-01 | 0.000E+00 |
| Chr15W | 3827231 | 3827604 | 71  | 1.163E-01 | 2.261E-01 | 1.097E-01  | 2.528E-03 |
| Chr15W | 3833497 | 3833971 | 110 | 5.997E-01 | 4.087E-01 | -1.911E-01 | 2.279E-03 |
| Chr15W | 3834452 | 3834921 | 227 | 5.392E-01 | 3.534E-01 | -1.858E-01 | 2.027E-03 |
| Chr15W | 3917015 | 3917455 | 112 | 2.983E-02 | 2.625E-01 | 2.326E-01  | 0.000E+00 |
| Chr15W | 3917912 | 3918357 | 90  | 3.632E-01 | 1.587E-01 | -2.045E-01 | 1.027E-03 |
| Chr15W | 3932040 | 3932382 | 42  | 2.537E-01 | 1.401E-01 | -1.137E-01 | 2.042E-02 |
| Chr15W | 3997621 | 3998102 | 154 | 2.585E-01 | 1.013E-01 | -1.571E-01 | 3.900E-06 |
| Chr15W | 4015439 | 4015932 | 163 | 2.281E-01 | 1.228E-01 | -1.053E-01 | 6.278E-03 |
| Chr15W | 4021417 | 4021909 | 164 | 2.395E-01 | 1.077E-01 | -1.318E-01 | 2.749E-03 |
| Chr15W | 4103673 | 4103997 | 55  | 4.465E-01 | 2.942E-01 | -1.523E-01 | 2.530E-05 |
| Chr15W | 4108016 | 4108463 | 55  | 3.644E-01 | 2.583E-01 | -1.061E-01 | 3.288E-04 |
| Chr15W | 4121505 | 4121988 | 191 | 4.265E-01 | 1.339E-01 | -2.926E-01 | 0.000E+00 |
| Chr15W | 4131325 | 4131809 | 109 | 1.476E-01 | 3.070E-02 | -1.169E-01 | 4.476E-02 |
| Chr15W | 4157369 | 4157866 | 129 | 1.025E-01 | 2.173E-01 | 1.148E-01  | 7.152E-04 |
| Chr15W | 4159373 | 4159861 | 139 | 2.362E-01 | 1.183E-01 | -1.180E-01 | 1.054E-02 |
| Chr15W | 4162358 | 4162849 | 153 | 2.565E-01 | 1.298E-01 | -1.267E-01 | 1.961E-02 |
| Chr15W | 4201081 | 4201578 | 148 | 1.868E-01 | 6.871E-02 | -1.181E-01 | 1.516E-04 |
| Chr15W | 4235514 | 4236007 | 123 | 4.817E-01 | 3.078E-01 | -1.739E-01 | 3.617E-04 |
| Chr15W | 4286437 | 4286921 | 140 | 3.153E-01 | 1.902E-01 | -1.251E-01 | 1.329E-03 |
| Chr15W | 4296341 | 4296836 | 165 | 2.528E-01 | 1.381E-01 | -1.147E-01 | 0.000E+00 |
| Chr15W | 4313371 | 4313858 | 161 | 2.738E-01 | 1.586E-01 | -1.152E-01 | 8.974E-03 |
| Chr15W | 4363533 | 4364024 | 159 | 1.425E-01 | 2.849E-02 | -1.140E-01 | 3.275E-02 |
| Chr15W | 4383717 | 4384195 | 153 | 1.716E-01 | 5.564E-02 | -1.160E-01 | 2.025E-02 |
| Chr15W | 4384200 | 4384682 | 154 | 3.549E-01 | 7.932E-02 | -2.755E-01 | 3.000E-07 |
| Chr15W | 4385651 | 4386132 | 84  | 6.013E-02 | 1.999E-01 | 1.398E-01  | 1.300E-06 |

|        |         |         |     |           |           |            |           |
|--------|---------|---------|-----|-----------|-----------|------------|-----------|
| Chr15W | 4423432 | 4423919 | 151 | 3.273E-01 | 4.277E-01 | 1.003E-01  | 3.214E-04 |
| Chr15W | 4437961 | 4438440 | 82  | 2.005E-01 | 3.028E-01 | 1.024E-01  | 8.710E-05 |
| Chr15W | 4453948 | 4454436 | 87  | 4.293E-01 | 2.643E-01 | -1.650E-01 | 3.449E-03 |
| Chr15W | 4464049 | 4464526 | 141 | 4.402E-01 | 2.914E-01 | -1.488E-01 | 1.462E-02 |
| Chr15W | 4469531 | 4470003 | 132 | 2.752E-01 | 3.906E-01 | 1.153E-01  | 1.195E-02 |
| Chr15W | 4593598 | 4594086 | 143 | 2.958E-01 | 4.696E-01 | 1.738E-01  | 1.722E-02 |
| Chr15W | 4643536 | 4644012 | 142 | 8.724E-02 | 2.029E-01 | 1.157E-01  | 2.870E-03 |
| Chr15W | 4646013 | 4646497 | 101 | 1.227E-01 | 1.279E-02 | -1.099E-01 | 3.891E-02 |
| Chr15W | 4947234 | 4947724 | 139 | 2.361E-01 | 1.028E-01 | -1.333E-01 | 1.378E-04 |
| Chr15W | 4978217 | 4978542 | 52  | 3.847E-01 | 2.085E-01 | -1.762E-01 | 1.106E-04 |
| Chr15W | 5087162 | 5087657 | 189 | 8.078E-02 | 2.320E-01 | 1.512E-01  | 4.273E-03 |
| Chr15W | 5105101 | 5105585 | 117 | 1.818E-01 | 6.411E-02 | -1.177E-01 | 4.844E-02 |
| Chr15W | 5164611 | 5164991 | 131 | 1.692E-01 | 4.209E-02 | -1.271E-01 | 1.252E-02 |
| Chr15W | 5174250 | 5174660 | 74  | 2.589E-01 | 9.109E-02 | -1.678E-01 | 0.000E+00 |
| Chr15W | 5444203 | 5444697 | 202 | 2.201E-01 | 4.155E-02 | -1.786E-01 | 8.579E-03 |
| Chr15W | 5444701 | 5445197 | 203 | 1.635E-01 | 5.932E-02 | -1.042E-01 | 2.589E-02 |
| Chr15W | 5448694 | 5449193 | 145 | 1.289E-01 | 1.958E-02 | -1.093E-01 | 3.167E-02 |
| Chr15W | 5496893 | 5497377 | 180 | 7.092E-02 | 1.729E-01 | 1.020E-01  | 9.731E-03 |
| Chr15W | 5515948 | 5516422 | 74  | 1.206E-01 | 2.275E-01 | 1.069E-01  | 3.964E-02 |
| Chr15W | 5552042 | 5552532 | 110 | 2.922E-01 | 1.300E-01 | -1.622E-01 | 3.761E-02 |
| Chr15W | 5657629 | 5657892 | 44  | 2.628E-01 | 3.836E-01 | 1.208E-01  | 6.439E-04 |
| Chr15W | 5658642 | 5658877 | 44  | 2.821E-01 | 1.269E-01 | -1.552E-01 | 3.000E-07 |
| Chr15W | 5859885 | 5860360 | 108 | 1.949E-01 | 2.987E-01 | 1.038E-01  | 7.562E-04 |
| Chr15W | 5870242 | 5870733 | 182 | 3.074E-01 | 1.733E-01 | -1.341E-01 | 4.661E-03 |
| Chr15W | 5950023 | 5950511 | 107 | 2.217E-01 | 1.156E-01 | -1.061E-01 | 3.418E-03 |
| Chr15W | 5972494 | 5972989 | 187 | 4.854E-01 | 2.198E-01 | -2.656E-01 | 1.250E-03 |
| Chr15W | 6003778 | 6004243 | 173 | 2.572E-01 | 4.454E-01 | 1.882E-01  | 4.886E-02 |
| Chr15W | 6017614 | 6018099 | 118 | 4.011E-01 | 2.231E-01 | -1.780E-01 | 8.557E-04 |
| Chr15W | 6033272 | 6033759 | 137 | 3.086E-01 | 4.481E-01 | 1.394E-01  | 1.931E-04 |
| Chr15W | 6076352 | 6076846 | 71  | 2.505E-01 | 6.064E-01 | 3.559E-01  | 0.000E+00 |
| Chr15W | 6089848 | 6090344 | 167 | 3.273E-01 | 2.168E-01 | -1.106E-01 | 1.910E-03 |
| Chr15W | 6096851 | 6097345 | 90  | 4.878E-01 | 3.130E-01 | -1.748E-01 | 0.000E+00 |
| Chr15W | 6100569 | 6101066 | 94  | 1.882E-01 | 3.945E-01 | 2.064E-01  | 1.063E-04 |
| Chr15W | 6101085 | 6101564 | 165 | 2.881E-01 | 1.769E-01 | -1.112E-01 | 5.568E-03 |
| Chr15W | 6105052 | 6105548 | 94  | 3.136E-01 | 2.013E-01 | -1.123E-01 | 1.275E-04 |
| Chr15W | 6131444 | 6131934 | 102 | 5.207E-01 | 3.785E-01 | -1.422E-01 | 1.836E-02 |
| Chr15W | 6146878 | 6147373 | 156 | 3.007E-01 | 1.606E-01 | -1.401E-01 | 3.586E-03 |
| Chr15W | 6147880 | 6148368 | 204 | 2.781E-01 | 1.012E-01 | -1.769E-01 | 4.770E-02 |
| Chr15W | 6217537 | 6218023 | 130 | 3.700E-01 | 2.245E-01 | -1.456E-01 | 0.000E+00 |
| Chr15W | 6259873 | 6260368 | 153 | 3.356E-01 | 1.170E-01 | -2.187E-01 | 6.290E-05 |
| Chr15W | 6328005 | 6328493 | 117 | 5.528E-01 | 3.992E-01 | -1.535E-01 | 0.000E+00 |
| Chr15W | 6330476 | 6330954 | 144 | 1.576E-01 | 3.692E-01 | 2.116E-01  | 2.000E-07 |
| Chr15W | 6359387 | 6359861 | 169 | 2.177E-01 | 4.004E-01 | 1.827E-01  | 1.680E-04 |
| Chr15W | 6366212 | 6366694 | 87  | 5.920E-02 | 4.110E-01 | 3.518E-01  | 0.000E+00 |
| Chr15W | 6373529 | 6374014 | 105 | 3.715E-01 | 1.442E-01 | -2.272E-01 | 1.173E-03 |
| Chr15W | 6380579 | 6381066 | 163 | 3.824E-01 | 2.350E-01 | -1.474E-01 | 0.000E+00 |
| Chr15W | 6398026 | 6398520 | 87  | 2.690E-02 | 1.564E-01 | 1.295E-01  | 0.000E+00 |

|        |         |         |     |           |           |            |           |
|--------|---------|---------|-----|-----------|-----------|------------|-----------|
| Chr15W | 6409003 | 6409491 | 166 | 1.158E-01 | 2.762E-01 | 1.604E-01  | 3.140E-05 |
| Chr15W | 6445452 | 6445911 | 176 | 5.419E-01 | 4.203E-01 | -1.216E-01 | 2.727E-02 |
| Chr15W | 6445914 | 6446378 | 133 | 6.439E-01 | 5.102E-01 | -1.338E-01 | 8.475E-03 |
| Chr15W | 6464616 | 6465087 | 83  | 2.967E-01 | 1.651E-01 | -1.316E-01 | 2.474E-04 |
| Chr15W | 6465090 | 6465558 | 143 | 5.643E-01 | 3.287E-01 | -2.356E-01 | 3.000E-07 |
| Chr15W | 6507372 | 6507869 | 135 | 1.204E-01 | 2.808E-01 | 1.604E-01  | 0.000E+00 |
| Chr15W | 6507874 | 6508370 | 139 | 5.967E-02 | 2.248E-01 | 1.651E-01  | 3.430E-03 |
| Chr15W | 6545850 | 6546337 | 155 | 4.103E-01 | 2.980E-01 | -1.124E-01 | 3.810E-05 |
| Chr15W | 6563862 | 6564352 | 168 | 1.986E-01 | 4.594E-02 | -1.526E-01 | 2.840E-05 |
| Chr15W | 6570835 | 6571329 | 167 | 3.554E-01 | 1.757E-01 | -1.797E-01 | 1.452E-04 |
| Chr15W | 6611672 | 6612086 | 95  | 2.961E-01 | 1.638E-01 | -1.323E-01 | 2.137E-02 |
| Chr15W | 6758465 | 6758948 | 62  | 5.523E-01 | 3.514E-01 | -2.009E-01 | 9.703E-04 |
| Chr15W | 6793539 | 6794030 | 127 | 3.606E-01 | 1.140E-01 | -2.466E-01 | 1.658E-04 |
| Chr15W | 6803398 | 6803886 | 139 | 5.973E-02 | 1.934E-01 | 1.336E-01  | 7.590E-03 |
| Chr15W | 6821709 | 6821896 | 34  | 4.142E-01 | 3.012E-01 | -1.131E-01 | 3.558E-02 |
| Chr15W | 6821985 | 6822212 | 29  | 2.414E-01 | 7.347E-02 | -1.679E-01 | 1.088E-03 |
| Chr15W | 6826333 | 6826832 | 172 | 3.084E-01 | 1.344E-01 | -1.740E-01 | 2.200E-06 |
| Chr15W | 6846310 | 6846804 | 146 | 3.771E-01 | 2.314E-01 | -1.457E-01 | 3.409E-02 |
| Chr15W | 6847781 | 6848068 | 103 | 4.132E-01 | 5.722E-01 | 1.590E-01  | 5.399E-03 |
| Chr15W | 6849865 | 6850173 | 101 | 3.370E-01 | 5.243E-01 | 1.873E-01  | 3.671E-03 |
| Chr15W | 6885880 | 6886376 | 173 | 2.807E-01 | 8.805E-02 | -1.927E-01 | 0.000E+00 |
| Chr15W | 6886380 | 6886877 | 119 | 2.345E-01 | 4.603E-02 | -1.885E-01 | 0.000E+00 |
| Chr15W | 6886880 | 6887378 | 174 | 3.000E-01 | 1.192E-01 | -1.808E-01 | 0.000E+00 |
| Chr15W | 6887381 | 6887875 | 107 | 3.198E-01 | 1.361E-01 | -1.837E-01 | 0.000E+00 |
| Chr15W | 6892875 | 6893371 | 198 | 1.573E-01 | 2.640E-01 | 1.067E-01  | 1.989E-03 |
| Chr15W | 6919348 | 6919844 | 172 | 4.019E-01 | 2.527E-01 | -1.492E-01 | 3.486E-03 |
| Chr15W | 6925944 | 6926441 | 170 | 2.532E-01 | 1.438E-01 | -1.094E-01 | 3.711E-02 |
| Chr15W | 6926943 | 6927439 | 186 | 1.090E-01 | 2.925E-01 | 1.835E-01  | 2.800E-06 |
| Chr15W | 6935427 | 6935923 | 175 | 3.700E-02 | 1.893E-01 | 1.523E-01  | 4.759E-04 |
| Chr15W | 6940917 | 6941411 | 109 | 3.886E-01 | 2.767E-01 | -1.119E-01 | 2.294E-02 |
| Chr15W | 6941918 | 6942414 | 142 | 3.018E-01 | 4.380E-01 | 1.363E-01  | 6.128E-03 |
| Chr15W | 6945917 | 6946404 | 180 | 2.594E-01 | 3.938E-01 | 1.344E-01  | 5.256E-03 |
| Chr15W | 6965873 | 6966371 | 150 | 4.405E-01 | 1.754E-01 | -2.651E-01 | 1.259E-02 |
| Chr15W | 6966877 | 6967369 | 151 | 5.042E-01 | 3.967E-01 | -1.076E-01 | 2.232E-03 |
| Chr15W | 6967876 | 6968347 | 140 | 6.448E-01 | 3.636E-01 | -2.811E-01 | 1.300E-06 |
| Chr15W | 6970351 | 6970838 | 166 | 2.549E-01 | 8.972E-02 | -1.652E-01 | 1.080E-05 |
| Chr15W | 6985062 | 6985544 | 213 | 2.828E-01 | 1.522E-01 | -1.306E-01 | 0.000E+00 |
| Chr15W | 7012405 | 7012901 | 130 | 4.624E-01 | 3.428E-01 | -1.195E-01 | 0.000E+00 |
| Chr15W | 7028328 | 7028821 | 171 | 3.840E-01 | 1.495E-01 | -2.345E-01 | 1.800E-05 |
| Chr15W | 7041374 | 7041851 | 170 | 3.011E-01 | 1.622E-01 | -1.389E-01 | 1.590E-05 |
| Chr15W | 7051791 | 7052284 | 137 | 2.011E-01 | 5.730E-02 | -1.438E-01 | 1.287E-03 |
| Chr15W | 7055267 | 7055758 | 149 | 3.009E-02 | 2.273E-01 | 1.972E-01  | 0.000E+00 |
| Chr15W | 7061221 | 7061709 | 185 | 4.875E-01 | 3.817E-01 | -1.058E-01 | 4.000E-06 |
| Chr15W | 7090499 | 7090991 | 150 | 1.352E-01 | 3.586E-01 | 2.234E-01  | 2.290E-02 |
| Chr15W | 7101176 | 7101659 | 121 | 3.080E-01 | 1.961E-01 | -1.119E-01 | 1.400E-06 |
| Chr15W | 7107053 | 7107489 | 55  | 6.748E-01 | 5.205E-01 | -1.543E-01 | 6.966E-04 |
| Chr15W | 7143522 | 7144015 | 150 | 4.832E-01 | 3.781E-01 | -1.051E-01 | 1.800E-06 |

|        |         |         |     |           |           |            |           |
|--------|---------|---------|-----|-----------|-----------|------------|-----------|
| Chr15W | 7147984 | 7148477 | 132 | 4.888E-01 | 2.550E-01 | -2.338E-01 | 2.590E-02 |
| Chr15W | 7156913 | 7157405 | 186 | 3.932E-02 | 1.444E-01 | 1.051E-01  | 6.780E-05 |
| Chr15W | 7207495 | 7207988 | 143 | 6.571E-02 | 1.895E-01 | 1.238E-01  | 0.000E+00 |
| Chr15W | 7213940 | 7214429 | 185 | 2.696E-01 | 1.375E-01 | -1.321E-01 | 6.397E-03 |
| Chr15W | 7246343 | 7246838 | 175 | 3.091E-01 | 1.863E-01 | -1.228E-01 | 1.889E-02 |
| Chr15W | 7283719 | 7284209 | 203 | 5.918E-01 | 3.636E-01 | -2.282E-01 | 0.000E+00 |
| Chr15W | 7346427 | 7346919 | 175 | 1.506E-01 | 9.521E-03 | -1.411E-01 | 4.206E-04 |
| Chr15W | 7376941 | 7377428 | 137 | 3.892E-01 | 1.928E-01 | -1.964E-01 | 1.800E-06 |
| Chr15W | 7377926 | 7378418 | 209 | 4.611E-01 | 3.428E-01 | -1.183E-01 | 2.655E-02 |
| Chr15W | 7441218 | 7441707 | 116 | 1.156E-01 | 3.097E-01 | 1.941E-01  | 7.000E-07 |
| Chr15W | 7456212 | 7456680 | 146 | 1.729E-01 | 2.873E-01 | 1.144E-01  | 1.328E-04 |
| Chr15W | 7456714 | 7457210 | 106 | 6.532E-01 | 5.170E-01 | -1.362E-01 | 0.000E+00 |
| Chr15W | 7457214 | 7457710 | 138 | 1.516E-01 | 3.032E-01 | 1.516E-01  | 0.000E+00 |
| Chr15W | 7457720 | 7458210 | 170 | 2.623E-01 | 3.988E-01 | 1.366E-01  | 3.410E-04 |
| Chr15W | 7461211 | 7461705 | 119 | 5.711E-01 | 4.692E-01 | -1.019E-01 | 2.286E-04 |
| Chr15W | 7506267 | 7506756 | 139 | 3.180E-01 | 2.089E-01 | -1.090E-01 | 3.190E-05 |
| Chr15W | 7510765 | 7511233 | 144 | 4.339E-01 | 3.222E-01 | -1.117E-01 | 1.000E-07 |
| Chr15W | 7529721 | 7530214 | 144 | 2.497E-01 | 3.529E-01 | 1.032E-01  | 3.462E-03 |
| Chr15W | 7534211 | 7534705 | 218 | 2.673E-01 | 3.711E-01 | 1.038E-01  | 9.229E-03 |
| Chr15W | 7540701 | 7541189 | 112 | 3.119E-01 | 1.636E-01 | -1.483E-01 | 9.655E-03 |
| Chr15W | 7614790 | 7615284 | 180 | 3.190E-01 | 2.039E-01 | -1.151E-01 | 2.272E-02 |
| Chr15W | 7696425 | 7696910 | 132 | 6.327E-02 | 3.370E-01 | 2.737E-01  | 0.000E+00 |
| Chr15W | 7699898 | 7700391 | 142 | 1.158E-01 | 2.812E-01 | 1.654E-01  | 5.400E-06 |
| Chr15W | 7733883 | 7734360 | 132 | 4.003E-04 | 2.673E-01 | 2.669E-01  | 0.000E+00 |
| Chr15W | 7734883 | 7735377 | 158 | 3.577E-01 | 2.523E-01 | -1.054E-01 | 1.552E-02 |
| Chr15W | 7736882 | 7737381 | 195 | 9.392E-02 | 1.972E-01 | 1.032E-01  | 4.862E-02 |
| Chr15W | 7746409 | 7746876 | 182 | 5.104E-01 | 3.662E-01 | -1.443E-01 | 0.000E+00 |
| Chr15W | 7763918 | 7764396 | 181 | 1.056E-01 | 2.081E-01 | 1.026E-01  | 1.520E-05 |
| Chr15W | 7764400 | 7764883 | 199 | 1.544E-01 | 5.258E-02 | -1.018E-01 | 8.017E-03 |
| Chr15W | 7785704 | 7786180 | 145 | 9.097E-02 | 2.646E-01 | 1.736E-01  | 4.073E-03 |
| Chr15W | 7807890 | 7808292 | 131 | 3.548E-02 | 2.188E-01 | 1.833E-01  | 0.000E+00 |
| Chr15W | 7808712 | 7809110 | 78  | 3.038E-02 | 1.713E-01 | 1.410E-01  | 1.300E-06 |
| Chr15W | 7817736 | 7818215 | 107 | 2.106E-01 | 3.322E-01 | 1.217E-01  | 7.400E-06 |
| Chr15W | 7819720 | 7820216 | 169 | 3.139E-02 | 1.352E-01 | 1.038E-01  | 1.138E-02 |
| Chr15W | 7824692 | 7825186 | 52  | 4.265E-01 | 5.431E-01 | 1.166E-01  | 4.460E-02 |
| Chr15W | 7827525 | 7828009 | 147 | 6.195E-02 | 2.027E-01 | 1.407E-01  | 6.920E-05 |
| Chr15W | 7831481 | 7831968 | 167 | 2.397E-01 | 1.290E-01 | -1.108E-01 | 6.669E-03 |
| Chr15W | 7834945 | 7835439 | 78  | 3.179E-01 | 2.106E-01 | -1.072E-01 | 4.000E-07 |
| Chr15W | 7851786 | 7852275 | 181 | 2.340E-01 | 1.319E-01 | -1.022E-01 | 5.746E-04 |
| Chr15W | 7869669 | 7870155 | 64  | 1.203E-01 | 6.962E-03 | -1.133E-01 | 3.477E-02 |
| Chr15W | 7877321 | 7877785 | 199 | 3.236E-01 | 1.558E-01 | -1.678E-01 | 2.648E-02 |
| Chr15W | 7881898 | 7882368 | 125 | 3.835E-01 | 1.973E-01 | -1.863E-01 | 2.146E-03 |
| Chr15W | 7885373 | 7885866 | 189 | 2.592E-02 | 1.512E-01 | 1.253E-01  | 6.072E-03 |
| Chr15W | 7885870 | 7886358 | 114 | 5.614E-02 | 1.634E-01 | 1.073E-01  | 4.306E-02 |
| Chr15W | 7886862 | 7887349 | 88  | 4.561E-01 | 3.522E-01 | -1.039E-01 | 1.467E-03 |
| Chr15W | 7901424 | 7901900 | 119 | 4.423E-01 | 2.533E-01 | -1.890E-01 | 4.086E-02 |
| Chr15W | 7916373 | 7916864 | 135 | 5.997E-02 | 1.631E-01 | 1.032E-01  | 0.000E+00 |

|        |         |         |     |           |           |            |           |
|--------|---------|---------|-----|-----------|-----------|------------|-----------|
| Chr15W | 7920319 | 7920810 | 166 | 3.250E-01 | 1.541E-01 | -1.709E-01 | 2.120E-02 |
| Chr15W | 7963142 | 7963616 | 139 | 1.472E-01 | 2.517E-01 | 1.045E-01  | 1.000E-07 |
| Chr15W | 7964131 | 7964630 | 171 | 2.125E-01 | 6.532E-02 | -1.472E-01 | 1.112E-04 |
| Chr15W | 7968631 | 7969123 | 149 | 1.205E-01 | 2.349E-01 | 1.144E-01  | 8.950E-05 |
| Chr15W | 7982124 | 7982621 | 164 | 5.062E-02 | 1.944E-01 | 1.438E-01  | 2.162E-04 |
| Chr15W | 7986626 | 7987119 | 141 | 6.968E-02 | 2.598E-01 | 1.901E-01  | 1.627E-03 |
| Chr15W | 7987621 | 7988116 | 177 | 2.210E-02 | 1.494E-01 | 1.273E-01  | 0.000E+00 |
| Chr15W | 8040509 | 8041003 | 163 | 5.129E-01 | 3.006E-01 | -2.123E-01 | 1.000E-06 |
| Chr15W | 8043455 | 8043917 | 122 | 5.212E-02 | 1.800E-01 | 1.279E-01  | 2.120E-03 |
| Chr15W | 8078427 | 8078831 | 92  | 4.655E-01 | 3.129E-01 | -1.527E-01 | 7.764E-03 |
| Chr15W | 8168118 | 8168592 | 150 | 3.217E-01 | 1.594E-01 | -1.623E-01 | 2.355E-03 |
| Chr15W | 8191577 | 8192072 | 165 | 2.593E-02 | 1.446E-01 | 1.187E-01  | 1.050E-05 |
| Chr15W | 8192074 | 8192566 | 187 | 7.135E-02 | 1.805E-01 | 1.091E-01  | 2.326E-02 |
| Chr15W | 8203002 | 8203495 | 107 | 1.339E-01 | 3.374E-01 | 2.035E-01  | 6.100E-06 |
| Chr15W | 8217405 | 8217894 | 150 | 5.140E-02 | 1.921E-01 | 1.407E-01  | 1.160E-05 |
| Chr15W | 8217897 | 8218380 | 173 | 8.492E-02 | 2.675E-01 | 1.825E-01  | 1.520E-04 |
| Chr15W | 8219863 | 8220348 | 157 | 6.591E-02 | 2.000E-01 | 1.341E-01  | 7.700E-06 |
| Chr15W | 8238362 | 8238828 | 176 | 3.809E-01 | 2.682E-01 | -1.126E-01 | 2.319E-02 |
| Chr15W | 8245046 | 8245512 | 78  | 4.771E-02 | 1.808E-01 | 1.331E-01  | 0.000E+00 |
| Chr15W | 8288131 | 8288616 | 174 | 3.015E-01 | 1.623E-01 | -1.392E-01 | 4.025E-04 |
| Chr15W | 8300615 | 8301083 | 154 | 2.095E-01 | 3.685E-01 | 1.590E-01  | 5.740E-05 |
| Chr15W | 8381013 | 8381508 | 127 | 3.265E-02 | 1.723E-01 | 1.397E-01  | 0.000E+00 |
| Chr15W | 8392989 | 8393468 | 126 | 1.236E-01 | 2.747E-01 | 1.511E-01  | 1.591E-02 |
| Chr15W | 8541758 | 8542208 | 205 | 4.430E-01 | 3.299E-01 | -1.131E-01 | 6.400E-06 |
| Chr15W | 8607826 | 8608270 | 50  | 1.347E-01 | 2.936E-02 | -1.053E-01 | 2.252E-02 |
| Chr15W | 8663943 | 8664439 | 159 | 2.657E-01 | 8.513E-02 | -1.805E-01 | 4.523E-04 |
| Chr15W | 8667440 | 8667939 | 88  | 3.380E-01 | 4.856E-01 | 1.476E-01  | 2.000E-06 |
| Chr15W | 8689941 | 8690415 | 119 | 3.839E-01 | 5.190E-01 | 1.351E-01  | 1.729E-02 |
| Chr15W | 8691442 | 8691933 | 168 | 6.875E-02 | 1.913E-01 | 1.225E-01  | 2.680E-05 |
| Chr15W | 8716943 | 8717429 | 175 | 3.746E-03 | 1.262E-01 | 1.225E-01  | 1.000E-07 |
| Chr15W | 8743427 | 8743922 | 159 | 2.543E-01 | 1.351E-01 | -1.192E-01 | 5.900E-06 |
| Chr15W | 8771503 | 8771997 | 150 | 3.880E-01 | 2.873E-01 | -1.007E-01 | 1.300E-06 |
| Chr15W | 8772506 | 8772988 | 134 | 4.287E-01 | 3.202E-01 | -1.085E-01 | 0.000E+00 |
| Chr15W | 8781426 | 8781918 | 193 | 5.282E-02 | 2.298E-01 | 1.770E-01  | 1.700E-06 |
| Chr15W | 8789867 | 8790354 | 184 | 1.877E-01 | 8.570E-02 | -1.020E-01 | 3.559E-02 |
| Chr15W | 8830816 | 8831275 | 67  | 5.875E-01 | 4.332E-01 | -1.543E-01 | 6.450E-03 |
| Chr15W | 8840900 | 8841330 | 133 | 2.416E-01 | 3.734E-01 | 1.318E-01  | 2.250E-05 |
| Chr15W | 8849100 | 8849593 | 126 | 1.243E-01 | 7.766E-03 | -1.165E-01 | 3.439E-03 |
| Chr15W | 8874365 | 8874835 | 117 | 9.319E-02 | 2.315E-01 | 1.383E-01  | 1.755E-04 |
| Chr15W | 8899764 | 8900256 | 147 | 1.023E-01 | 2.116E-01 | 1.093E-01  | 2.925E-04 |
| Chr15W | 8905700 | 8906186 | 189 | 6.863E-02 | 2.315E-01 | 1.629E-01  | 2.826E-04 |
| Chr15W | 8906192 | 8906681 | 161 | 7.209E-02 | 2.763E-01 | 2.042E-01  | 0.000E+00 |
| Chr15W | 8906686 | 8907177 | 124 | 8.054E-02 | 2.522E-01 | 1.716E-01  | 4.793E-03 |
| Chr15W | 8907184 | 8907673 | 151 | 4.930E-02 | 2.568E-01 | 2.075E-01  | 0.000E+00 |
| Chr15W | 8913113 | 8913606 | 172 | 9.771E-02 | 2.658E-01 | 1.681E-01  | 3.813E-04 |
| Chr15W | 8913611 | 8914097 | 170 | 4.318E-02 | 2.011E-01 | 1.580E-01  | 0.000E+00 |
| Chr15W | 8914105 | 8914592 | 166 | 1.094E-01 | 2.205E-01 | 1.112E-01  | 1.234E-04 |

|        |          |          |     |           |           |            |           |
|--------|----------|----------|-----|-----------|-----------|------------|-----------|
| Chr15W | 8919540  | 8920034  | 201 | 1.490E-01 | 3.057E-02 | -1.184E-01 | 3.635E-04 |
| Chr15W | 8933653  | 8934076  | 91  | 7.526E-02 | 2.269E-01 | 1.516E-01  | 5.000E-07 |
| Chr15W | 8934547  | 8935005  | 138 | 2.093E-01 | 3.289E-01 | 1.195E-01  | 0.000E+00 |
| Chr15W | 8948397  | 8948856  | 52  | 3.030E-01 | 1.544E-01 | -1.485E-01 | 2.900E-06 |
| Chr15W | 8951763  | 8952242  | 161 | 2.397E-01 | 5.233E-02 | -1.873E-01 | 0.000E+00 |
| Chr15W | 8956950  | 8957419  | 86  | 3.546E-02 | 2.951E-01 | 2.596E-01  | 2.860E-05 |
| Chr15W | 8957421  | 8957904  | 189 | 1.123E-01 | 2.814E-01 | 1.691E-01  | 3.370E-02 |
| Chr15W | 8971925  | 8972400  | 100 | 1.245E-01 | 2.281E-01 | 1.036E-01  | 8.900E-06 |
| Chr15W | 8977900  | 8978365  | 100 | 3.672E-01 | 5.115E-01 | 1.443E-01  | 1.000E-07 |
| Chr15W | 9003466  | 9003900  | 150 | 1.068E-01 | 6.054E-03 | -1.008E-01 | 4.466E-02 |
| Chr15W | 9015060  | 9015553  | 123 | 1.542E-01 | 4.505E-02 | -1.092E-01 | 0.000E+00 |
| Chr15W | 9027943  | 9028436  | 176 | 3.056E-01 | 1.221E-01 | -1.835E-01 | 1.511E-02 |
| Chr15W | 9049649  | 9050133  | 183 | 2.222E-01 | 9.436E-02 | -1.278E-01 | 2.870E-02 |
| Chr15W | 9050136  | 9050621  | 191 | 2.950E-01 | 1.248E-01 | -1.701E-01 | 2.362E-02 |
| Chr15W | 9053056  | 9053539  | 74  | 4.046E-01 | 2.460E-01 | -1.587E-01 | 2.987E-03 |
| Chr15W | 9054032  | 9054514  | 93  | 4.996E-01 | 3.666E-01 | -1.329E-01 | 8.000E-07 |
| Chr15W | 9966426  | 9966570  | 22  | 2.357E-01 | 1.123E-01 | -1.234E-01 | 9.023E-03 |
| Chr15W | 10465791 | 10466134 | 37  | 3.671E-01 | 2.010E-01 | -1.661E-01 | 1.833E-03 |
| Chr15W | 10542227 | 10542498 | 24  | 2.060E-01 | 3.478E-01 | 1.419E-01  | 3.105E-02 |
| Chr15W | 10927564 | 10927680 | 17  | 3.704E-01 | 1.702E-01 | -2.002E-01 | 1.782E-04 |
| Chr15W | 10998660 | 10998917 | 39  | 3.422E-01 | 2.386E-01 | -1.036E-01 | 3.000E-06 |
| Chr15W | 11021038 | 11021477 | 36  | 1.793E-01 | 2.961E-01 | 1.167E-01  | 2.825E-04 |
| Chr15W | 11209885 | 11210275 | 26  | 1.511E-01 | 3.078E-01 | 1.566E-01  | 7.436E-03 |
| Chr15W | 12052277 | 12052437 | 28  | 2.695E-01 | 4.218E-01 | 1.522E-01  | 3.306E-03 |
| Chr15W | 12304358 | 12304640 | 27  | 2.578E-01 | 1.207E-01 | -1.372E-01 | 1.507E-03 |
| Chr15W | 12351429 | 12351683 | 31  | 2.764E-01 | 1.022E-01 | -1.742E-01 | 2.300E-06 |
| Chr15W | 13713123 | 13713316 | 39  | 2.197E-01 | 3.918E-01 | 1.721E-01  | 6.695E-03 |
| Chr15W | 13738516 | 13738763 | 18  | 4.687E-01 | 2.075E-01 | -2.612E-01 | 6.919E-04 |
| Chr15W | 15572937 | 15573232 | 53  | 2.853E-01 | 1.769E-01 | -1.084E-01 | 2.501E-02 |
| Chr15Z | 645420   | 645742   | 30  | 1.620E-01 | 2.797E-01 | 1.177E-01  | 4.920E-05 |
| Chr15Z | 1186706  | 1186835  | 9   | 2.251E-01 | 5.332E-01 | 3.081E-01  | 8.728E-04 |
| Chr15Z | 2111676  | 2111826  | 31  | 5.282E-01 | 4.149E-01 | -1.133E-01 | 3.017E-03 |
| Chr15Z | 2484365  | 2484854  | 73  | 1.515E-01 | 4.154E-02 | -1.099E-01 | 3.076E-02 |
| Chr15Z | 2617668  | 2617771  | 18  | 1.174E-01 | 1.349E-02 | -1.039E-01 | 1.744E-02 |
| Chr15Z | 2662545  | 2663029  | 129 | 3.038E-01 | 1.981E-01 | -1.056E-01 | 2.173E-02 |
| Chr15Z | 2689436  | 2689871  | 85  | 2.306E-01 | 1.047E-01 | -1.259E-01 | 2.300E-06 |
| Chr15Z | 2773876  | 2774336  | 155 | 3.844E-01 | 2.672E-01 | -1.172E-01 | 0.000E+00 |
| Chr15Z | 3290088  | 3290585  | 160 | 2.599E-01 | 1.588E-01 | -1.011E-01 | 5.017E-04 |
| Chr15Z | 3454249  | 3454729  | 39  | 1.192E-01 | 2.312E-01 | 1.120E-01  | 2.110E-02 |
| Chr15Z | 3504446  | 3504824  | 114 | 1.655E-01 | 2.879E-01 | 1.224E-01  | 1.800E-02 |
| Chr15Z | 3535378  | 3535868  | 102 | 2.684E-01 | 1.470E-01 | -1.214E-01 | 4.293E-02 |
| Chr15Z | 3587883  | 3588364  | 110 | 3.848E-01 | 2.447E-01 | -1.401E-01 | 3.816E-04 |
| Chr15Z | 3669799  | 3670224  | 99  | 4.022E-01 | 2.359E-01 | -1.663E-01 | 1.284E-04 |
| Chr15Z | 3724407  | 3724895  | 209 | 3.914E-01 | 2.616E-01 | -1.298E-01 | 2.443E-04 |
| Chr15Z | 3858668  | 3859057  | 58  | 3.428E-02 | 1.568E-01 | 1.225E-01  | 1.453E-02 |
| Chr15Z | 3919721  | 3920050  | 40  | 7.256E-02 | 2.072E-01 | 1.347E-01  | 2.420E-05 |
| Chr15Z | 4150878  | 4151363  | 202 | 2.856E-01 | 1.561E-01 | -1.295E-01 | 3.110E-05 |

|        |          |          |     |           |           |            |           |
|--------|----------|----------|-----|-----------|-----------|------------|-----------|
| Chr15Z | 4412260  | 4412708  | 95  | 2.967E-01 | 1.766E-01 | -1.201E-01 | 2.438E-02 |
| Chr15Z | 4447609  | 4448096  | 75  | 5.142E-01 | 4.121E-01 | -1.021E-01 | 2.199E-04 |
| Chr15Z | 4461365  | 4461851  | 125 | 2.818E-01 | 1.610E-01 | -1.208E-01 | 1.669E-02 |
| Chr15Z | 4466293  | 4466772  | 177 | 2.404E-01 | 1.019E-01 | -1.385E-01 | 4.718E-04 |
| Chr15Z | 4481469  | 4481955  | 186 | 3.070E-01 | 1.818E-01 | -1.252E-01 | 6.029E-03 |
| Chr15Z | 4693531  | 4694019  | 225 | 1.845E-01 | 8.281E-02 | -1.017E-01 | 1.323E-02 |
| Chr15Z | 4714375  | 4714870  | 180 | 5.196E-01 | 4.186E-01 | -1.010E-01 | 1.090E-05 |
| Chr15Z | 4770925  | 4771414  | 183 | 4.428E-01 | 2.770E-01 | -1.658E-01 | 8.410E-05 |
| Chr15Z | 4771420  | 4771914  | 181 | 4.023E-01 | 2.844E-01 | -1.179E-01 | 0.000E+00 |
| Chr15Z | 4794363  | 4794842  | 106 | 4.435E-01 | 3.368E-01 | -1.066E-01 | 9.016E-03 |
| Chr15Z | 5181151  | 5181645  | 149 | 4.563E-01 | 3.551E-01 | -1.013E-01 | 1.653E-02 |
| Chr15Z | 5196071  | 5196559  | 192 | 3.051E-01 | 1.928E-01 | -1.122E-01 | 3.020E-05 |
| Chr15Z | 5231275  | 5231693  | 60  | 5.467E-01 | 4.270E-01 | -1.198E-01 | 1.167E-02 |
| Chr15Z | 5267226  | 5267612  | 63  | 2.493E-01 | 1.230E-01 | -1.263E-01 | 7.100E-06 |
| Chr15Z | 6539663  | 6539994  | 48  | 1.732E-01 | 6.967E-02 | -1.036E-01 | 3.449E-03 |
| Chr15Z | 7405076  | 7405233  | 17  | 2.152E-01 | 1.073E-01 | -1.079E-01 | 8.419E-03 |
| Chr15Z | 8453795  | 8453879  | 23  | 8.700E-02 | 1.918E-01 | 1.048E-01  | 7.141E-03 |
| Chr15Z | 8856266  | 8856586  | 43  | 7.933E-02 | 1.878E-01 | 1.084E-01  | 2.127E-04 |
| Chr15Z | 9751721  | 9751990  | 39  | 4.742E-01 | 2.327E-01 | -2.415E-01 | 4.370E-05 |
| Chr15Z | 10344282 | 10344684 | 33  | 4.444E-01 | 3.182E-01 | -1.262E-01 | 7.608E-03 |
| Chr15Z | 10567192 | 10567537 | 54  | 5.370E-01 | 3.986E-01 | -1.385E-01 | 2.027E-02 |
| Chr15Z | 11384610 | 11384951 | 41  | 4.601E-01 | 3.436E-01 | -1.165E-01 | 1.864E-03 |
| Chr15Z | 11487251 | 11487356 | 15  | 3.131E-01 | 1.770E-01 | -1.361E-01 | 1.493E-03 |
| Chr15Z | 11757541 | 11757886 | 45  | 2.376E-01 | 1.305E-01 | -1.072E-01 | 1.994E-02 |
| Chr15Z | 12248712 | 12249135 | 44  | 8.209E-02 | 2.842E-01 | 2.021E-01  | 2.100E-06 |
| Chr15Z | 12458772 | 12459216 | 67  | 3.405E-01 | 2.180E-01 | -1.224E-01 | 8.900E-06 |
| Chr15Z | 13208908 | 13209089 | 27  | 1.723E-01 | 2.763E-01 | 1.040E-01  | 1.989E-03 |
| Chr15Z | 13224456 | 13224849 | 64  | 1.553E-01 | 2.691E-01 | 1.138E-01  | 8.242E-04 |
| Chr16  | 752615   | 753092   | 182 | 1.633E-01 | 3.669E-01 | 2.036E-01  | 2.589E-02 |
| Chr16  | 863974   | 864457   | 129 | 6.372E-01 | 5.083E-01 | -1.289E-01 | 5.390E-05 |
| Chr16  | 872282   | 872703   | 76  | 3.203E-01 | 1.664E-01 | -1.539E-01 | 2.345E-02 |
| Chr16  | 876540   | 877034   | 101 | 5.986E-01 | 4.663E-01 | -1.322E-01 | 1.213E-03 |
| Chr16  | 969448   | 969945   | 172 | 3.536E-01 | 1.946E-01 | -1.590E-01 | 2.867E-02 |
| Chr16  | 1029538  | 1030033  | 197 | 2.157E-01 | 3.479E-01 | 1.321E-01  | 3.238E-02 |
| Chr16  | 1439960  | 1440447  | 75  | 1.104E-01 | 2.523E-01 | 1.419E-01  | 5.397E-03 |
| Chr16  | 1546108  | 1546595  | 95  | 5.434E-01 | 4.326E-01 | -1.108E-01 | 4.050E-05 |
| Chr16  | 1547092  | 1547576  | 160 | 2.948E-01 | 1.894E-01 | -1.054E-01 | 5.991E-04 |
| Chr16  | 1565972  | 1566464  | 106 | 4.497E-01 | 2.136E-01 | -2.362E-01 | 1.163E-02 |
| Chr16  | 1628193  | 1628671  | 112 | 2.835E-01 | 1.641E-01 | -1.195E-01 | 3.594E-04 |
| Chr16  | 1653230  | 1653649  | 72  | 2.698E-01 | 1.554E-01 | -1.144E-01 | 9.407E-03 |
| Chr16  | 1723839  | 1724325  | 128 | 1.773E-01 | 2.760E-02 | -1.497E-01 | 6.000E-07 |
| Chr16  | 1724329  | 1724781  | 95  | 4.876E-01 | 6.398E-01 | 1.522E-01  | 1.162E-03 |
| Chr16  | 1816084  | 1816581  | 118 | 5.612E-01 | 4.574E-01 | -1.038E-01 | 6.940E-05 |
| Chr16  | 2020460  | 2020950  | 160 | 2.874E-01 | 1.832E-01 | -1.042E-01 | 7.000E-07 |
| Chr16  | 2343573  | 2344067  | 171 | 2.381E-01 | 1.000E-01 | -1.382E-01 | 1.448E-02 |
| Chr16  | 2460198  | 2460691  | 195 | 3.439E-01 | 2.430E-01 | -1.008E-01 | 2.615E-04 |
| Chr16  | 2640440  | 2640901  | 69  | 4.322E-01 | 2.980E-01 | -1.342E-01 | 2.300E-06 |

|       |          |          |     |           |           |            |           |
|-------|----------|----------|-----|-----------|-----------|------------|-----------|
| Chr16 | 2833257  | 2833733  | 120 | 4.446E-01 | 3.158E-01 | -1.288E-01 | 6.808E-03 |
| Chr16 | 2925972  | 2926464  | 165 | 3.532E-01 | 2.319E-01 | -1.213E-01 | 0.000E+00 |
| Chr16 | 3252132  | 3252627  | 197 | 1.709E-01 | 6.698E-02 | -1.040E-01 | 3.240E-02 |
| Chr16 | 3420728  | 3420963  | 50  | 2.674E-01 | 1.303E-01 | -1.372E-01 | 1.443E-04 |
| Chr16 | 3602499  | 3602984  | 84  | 3.461E-01 | 2.398E-01 | -1.063E-01 | 2.000E-07 |
| Chr16 | 3624954  | 3625445  | 163 | 1.955E-01 | 8.297E-02 | -1.125E-01 | 9.387E-04 |
| Chr16 | 3820749  | 3821248  | 183 | 2.993E-01 | 1.860E-01 | -1.132E-01 | 5.473E-03 |
| Chr16 | 4023012  | 4023504  | 185 | 2.576E-01 | 1.347E-01 | -1.229E-01 | 5.772E-04 |
| Chr16 | 4161057  | 4161554  | 223 | 2.788E-01 | 1.435E-01 | -1.353E-01 | 4.729E-04 |
| Chr16 | 4161555  | 4162053  | 201 | 2.930E-01 | 1.801E-01 | -1.129E-01 | 1.076E-03 |
| Chr16 | 4162054  | 4162552  | 184 | 2.893E-01 | 1.862E-01 | -1.031E-01 | 8.580E-05 |
| Chr16 | 4316277  | 4316442  | 25  | 2.911E-01 | 1.647E-01 | -1.264E-01 | 1.855E-04 |
| Chr16 | 4513272  | 4513768  | 201 | 3.376E-01 | 2.314E-01 | -1.062E-01 | 4.481E-02 |
| Chr16 | 4904598  | 4905087  | 123 | 4.060E-01 | 2.526E-01 | -1.534E-01 | 9.500E-06 |
| Chr16 | 4925415  | 4925898  | 183 | 2.884E-01 | 1.883E-01 | -1.001E-01 | 1.000E-07 |
| Chr16 | 5195321  | 5195688  | 64  | 1.723E-01 | 2.922E-02 | -1.431E-01 | 1.935E-03 |
| Chr16 | 5476269  | 5476670  | 136 | 5.843E-01 | 4.593E-01 | -1.249E-01 | 9.127E-03 |
| Chr16 | 5640971  | 5641448  | 109 | 4.188E-01 | 9.216E-02 | -3.267E-01 | 1.689E-03 |
| Chr16 | 5641518  | 5641964  | 174 | 3.402E-01 | 2.070E-01 | -1.332E-01 | 2.256E-02 |
| Chr16 | 5778227  | 5778705  | 136 | 1.592E-01 | 2.897E-01 | 1.304E-01  | 1.232E-03 |
| Chr16 | 6399370  | 6399864  | 131 | 1.730E-01 | 3.298E-01 | 1.568E-01  | 1.380E-05 |
| Chr16 | 6433967  | 6434267  | 58  | 1.688E-01 | 3.253E-04 | -1.685E-01 | 0.000E+00 |
| Chr16 | 6696267  | 6696439  | 51  | 2.748E-01 | 4.293E-01 | 1.545E-01  | 1.568E-03 |
| Chr16 | 7091291  | 7091757  | 57  | 2.001E-01 | 3.176E-01 | 1.175E-01  | 1.923E-02 |
| Chr16 | 7405879  | 7406285  | 61  | 2.193E-01 | 1.156E-01 | -1.037E-01 | 1.000E-07 |
| Chr16 | 7576403  | 7576834  | 66  | 3.263E-01 | 2.256E-01 | -1.007E-01 | 7.691E-04 |
| Chr16 | 7923090  | 7923553  | 90  | 4.610E-01 | 3.385E-01 | -1.225E-01 | 1.317E-04 |
| Chr16 | 7923575  | 7924039  | 80  | 3.155E-01 | 2.008E-01 | -1.147E-01 | 6.000E-07 |
| Chr16 | 8165425  | 8165895  | 118 | 3.712E-01 | 2.636E-01 | -1.076E-01 | 2.188E-02 |
| Chr16 | 8440372  | 8440870  | 132 | 3.444E-01 | 1.982E-01 | -1.463E-01 | 1.978E-02 |
| Chr16 | 8552067  | 8552555  | 163 | 2.798E-01 | 1.618E-01 | -1.180E-01 | 1.780E-05 |
| Chr16 | 8592865  | 8593215  | 41  | 1.567E-01 | 2.691E-01 | 1.123E-01  | 2.678E-04 |
| Chr16 | 8600480  | 8600914  | 64  | 3.230E-01 | 4.627E-01 | 1.397E-01  | 6.480E-04 |
| Chr16 | 8660249  | 8660743  | 200 | 3.398E-01 | 2.117E-01 | -1.281E-01 | 9.390E-05 |
| Chr16 | 8894108  | 8894606  | 200 | 3.153E-01 | 1.787E-01 | -1.366E-01 | 5.854E-03 |
| Chr16 | 9165967  | 9166463  | 128 | 4.228E-01 | 3.139E-01 | -1.089E-01 | 9.500E-06 |
| Chr16 | 10894067 | 10894563 | 156 | 2.559E-01 | 1.433E-01 | -1.126E-01 | 0.000E+00 |
| Chr16 | 11137967 | 11138428 | 89  | 2.758E-01 | 1.189E-01 | -1.569E-01 | 8.000E-07 |
| Chr16 | 11505158 | 11505653 | 142 | 8.317E-02 | 2.044E-01 | 1.213E-01  | 1.482E-03 |
| Chr16 | 11859822 | 11860311 | 180 | 3.670E-01 | 2.584E-01 | -1.087E-01 | 7.105E-03 |
| Chr16 | 12672259 | 12672754 | 146 | 4.455E-01 | 3.190E-01 | -1.264E-01 | 4.906E-04 |
| Chr16 | 12730421 | 12730901 | 74  | 4.870E-01 | 3.849E-01 | -1.021E-01 | 1.360E-05 |
| Chr16 | 12768505 | 12768675 | 33  | 3.591E-01 | 1.794E-01 | -1.797E-01 | 2.836E-03 |
| Chr16 | 12804587 | 12805067 | 123 | 3.466E-01 | 2.307E-01 | -1.159E-01 | 6.169E-04 |
| Chr16 | 12886984 | 12887158 | 44  | 3.164E-01 | 5.350E-01 | 2.186E-01  | 1.181E-02 |
| Chr16 | 12926504 | 12926965 | 134 | 4.404E-01 | 2.742E-01 | -1.663E-01 | 4.835E-03 |
| Chr16 | 13435761 | 13436245 | 83  | 3.971E-01 | 2.915E-01 | -1.056E-01 | 9.212E-03 |

|       |          |          |     |           |           |            |           |
|-------|----------|----------|-----|-----------|-----------|------------|-----------|
| Chr16 | 13496596 | 13497087 | 70  | 3.060E-01 | 1.891E-01 | -1.169E-01 | 4.893E-04 |
| Chr16 | 13545899 | 13546397 | 151 | 4.102E-01 | 2.728E-01 | -1.375E-01 | 2.081E-02 |
| Chr16 | 13840113 | 13840596 | 139 | 1.316E-01 | 3.123E-01 | 1.806E-01  | 1.787E-02 |
| Chr16 | 14342435 | 14342929 | 111 | 3.328E-01 | 4.824E-01 | 1.495E-01  | 1.929E-02 |
| Chr16 | 14481822 | 14482313 | 153 | 5.494E-01 | 3.717E-01 | -1.777E-01 | 1.044E-02 |
| Chr16 | 14545063 | 14545557 | 137 | 1.806E-01 | 3.062E-01 | 1.256E-01  | 2.525E-02 |
| Chr16 | 15013131 | 15013623 | 75  | 3.439E-01 | 2.233E-01 | -1.206E-01 | 6.224E-03 |
| Chr16 | 15350475 | 15350951 | 48  | 4.798E-01 | 3.326E-01 | -1.473E-01 | 1.323E-02 |
| Chr16 | 15363742 | 15364228 | 166 | 4.620E-01 | 3.518E-01 | -1.102E-01 | 0.000E+00 |
| Chr16 | 16697673 | 16698165 | 184 | 3.273E-01 | 2.189E-01 | -1.084E-01 | 2.240E-04 |
| Chr16 | 18747501 | 18747997 | 53  | 6.386E-01 | 4.412E-01 | -1.974E-01 | 1.200E-06 |
| Chr16 | 18983919 | 18984413 | 118 | 1.370E-01 | 2.672E-02 | -1.103E-01 | 1.243E-03 |
| Chr16 | 19084846 | 19085329 | 97  | 2.772E-01 | 1.510E-01 | -1.262E-01 | 3.008E-04 |
| Chr16 | 20127836 | 20128319 | 91  | 6.792E-01 | 5.523E-01 | -1.268E-01 | 8.295E-03 |
| Chr16 | 20166018 | 20166433 | 34  | 3.659E-01 | 2.350E-01 | -1.309E-01 | 2.000E-06 |
| Chr16 | 20765342 | 20765830 | 197 | 2.469E-01 | 1.215E-01 | -1.254E-01 | 5.753E-04 |
| Chr16 | 20784225 | 20784716 | 149 | 3.059E-01 | 1.852E-01 | -1.207E-01 | 5.200E-06 |
| Chr16 | 20945425 | 20945922 | 122 | 3.710E-01 | 2.687E-01 | -1.023E-01 | 1.055E-02 |
| Chr16 | 21204411 | 21204901 | 164 | 3.442E-01 | 2.401E-01 | -1.041E-01 | 8.730E-04 |
| Chr16 | 21280598 | 21281096 | 173 | 2.415E-01 | 1.377E-01 | -1.038E-01 | 6.147E-04 |
| Chr16 | 21368355 | 21368841 | 136 | 7.210E-02 | 1.949E-01 | 1.228E-01  | 3.800E-03 |
| Chr16 | 21368909 | 21369346 | 82  | 2.967E-01 | 1.638E-01 | -1.328E-01 | 3.428E-02 |
| Chr16 | 21480929 | 21481410 | 99  | 5.370E-01 | 4.173E-01 | -1.197E-01 | 1.147E-02 |
| Chr16 | 21512600 | 21513095 | 158 | 6.210E-01 | 4.855E-01 | -1.355E-01 | 4.174E-04 |
| Chr16 | 21606626 | 21607123 | 208 | 2.249E-01 | 5.057E-02 | -1.743E-01 | 5.449E-03 |
| Chr16 | 22087945 | 22088422 | 83  | 2.795E-01 | 1.166E-01 | -1.629E-01 | 1.353E-03 |
| Chr16 | 24248429 | 24248755 | 61  | 5.121E-01 | 3.158E-01 | -1.963E-01 | 1.840E-05 |
| Chr16 | 24441698 | 24442196 | 164 | 3.811E-01 | 2.640E-01 | -1.171E-01 | 4.924E-03 |
| Chr16 | 24520173 | 24520659 | 161 | 3.472E-01 | 2.378E-01 | -1.095E-01 | 2.206E-03 |
| Chr16 | 25189210 | 25189515 | 85  | 4.947E-01 | 3.711E-01 | -1.237E-01 | 3.480E-05 |
| Chr16 | 25736811 | 25737003 | 9   | 1.851E-01 | 1.328E-02 | -1.719E-01 | 1.500E-05 |
| Chr16 | 25945541 | 25946040 | 214 | 1.709E-01 | 2.794E-01 | 1.085E-01  | 0.000E+00 |
| Chr16 | 26729914 | 26730412 | 164 | 4.864E-01 | 3.832E-01 | -1.032E-01 | 2.696E-03 |
| Chr16 | 27026337 | 27026819 | 120 | 3.716E-01 | 5.973E-01 | 2.257E-01  | 5.886E-03 |
| Chr16 | 27068896 | 27069388 | 133 | 4.016E-01 | 5.114E-01 | 1.098E-01  | 3.390E-04 |
| Chr16 | 27092744 | 27093219 | 134 | 3.090E-01 | 2.027E-01 | -1.062E-01 | 1.700E-05 |
| Chr16 | 27132716 | 27132827 | 25  | 3.138E-01 | 1.984E-01 | -1.153E-01 | 4.127E-03 |
| Chr16 | 27340386 | 27340884 | 149 | 1.446E-01 | 3.522E-02 | -1.094E-01 | 3.463E-03 |
| Chr16 | 27458795 | 27459258 | 149 | 6.154E-02 | 3.352E-01 | 2.736E-01  | 1.240E-02 |
| Chr16 | 27462842 | 27463321 | 126 | 3.311E-01 | 1.970E-01 | -1.342E-01 | 1.511E-04 |
| Chr16 | 27536564 | 27537051 | 79  | 4.607E-01 | 3.170E-01 | -1.436E-01 | 1.600E-06 |
| Chr16 | 27549844 | 27550342 | 130 | 2.435E-01 | 7.144E-02 | -1.721E-01 | 4.776E-03 |
| Chr16 | 27820272 | 27820730 | 133 | 3.492E-01 | 2.465E-01 | -1.027E-01 | 2.063E-03 |
| Chr16 | 28171307 | 28171790 | 157 | 2.032E-01 | 6.157E-02 | -1.416E-01 | 8.381E-03 |
| Chr16 | 28249199 | 28249663 | 184 | 2.093E-01 | 9.919E-02 | -1.101E-01 | 3.895E-02 |
| Chr16 | 28332488 | 28332983 | 147 | 2.592E-01 | 4.385E-01 | 1.793E-01  | 2.622E-03 |
| Chr16 | 28445582 | 28446077 | 134 | 3.764E-01 | 2.444E-01 | -1.320E-01 | 4.270E-05 |

|       |          |          |     |           |           |            |           |
|-------|----------|----------|-----|-----------|-----------|------------|-----------|
| Chr16 | 28446712 | 28447209 | 84  | 2.749E-01 | 1.189E-01 | -1.560E-01 | 7.690E-03 |
| Chr16 | 28490524 | 28490891 | 57  | 3.212E-01 | 2.158E-01 | -1.054E-01 | 3.026E-02 |
| Chr16 | 28501699 | 28502123 | 56  | 3.247E-01 | 1.390E-01 | -1.856E-01 | 1.700E-05 |
| Chr16 | 28658249 | 28658744 | 164 | 4.552E-01 | 3.511E-01 | -1.041E-01 | 1.900E-03 |
| Chr16 | 29359359 | 29359832 | 127 | 2.229E-01 | 1.105E-01 | -1.124E-01 | 2.468E-02 |
| Chr16 | 29597003 | 29597499 | 191 | 3.636E-01 | 2.603E-01 | -1.033E-01 | 2.487E-04 |
| Chr16 | 29626361 | 29626854 | 150 | 2.786E-01 | 1.730E-01 | -1.056E-01 | 1.185E-02 |
| Chr16 | 29627383 | 29627847 | 114 | 1.443E-01 | 3.109E-01 | 1.667E-01  | 5.936E-04 |
| Chr16 | 29631470 | 29631587 | 36  | 1.758E-01 | 3.338E-04 | -1.754E-01 | 1.599E-04 |
| Chr16 | 29644603 | 29645077 | 116 | 4.018E-01 | 2.808E-01 | -1.210E-01 | 9.955E-04 |
| Chr16 | 29648887 | 29649361 | 122 | 1.105E-01 | 9.230E-03 | -1.013E-01 | 8.000E-07 |
| Chr16 | 29672333 | 29672814 | 137 | 4.048E-01 | 2.012E-01 | -2.036E-01 | 3.196E-02 |
| Chr16 | 29690471 | 29690954 | 154 | 4.507E-01 | 2.631E-01 | -1.876E-01 | 1.197E-03 |
| Chr16 | 29690959 | 29691451 | 125 | 3.295E-01 | 2.256E-01 | -1.039E-01 | 1.076E-02 |
| Chr16 | 29708963 | 29709434 | 100 | 1.195E-01 | 2.255E-01 | 1.060E-01  | 2.400E-06 |
| Chr16 | 29727878 | 29728240 | 66  | 1.390E-01 | 2.563E-01 | 1.174E-01  | 1.780E-02 |
| Chr16 | 29777282 | 29777611 | 67  | 1.515E-01 | 4.512E-02 | -1.064E-01 | 2.278E-02 |
| Chr16 | 30257560 | 30258042 | 146 | 2.486E-01 | 1.471E-01 | -1.015E-01 | 2.233E-02 |
| Chr16 | 30462335 | 30462785 | 117 | 3.461E-01 | 2.398E-01 | -1.064E-01 | 8.259E-04 |
| Chr16 | 31062487 | 31062970 | 140 | 1.816E-01 | 4.904E-02 | -1.325E-01 | 3.533E-04 |
| Chr16 | 31181788 | 31182274 | 136 | 2.398E-01 | 1.283E-01 | -1.115E-01 | 3.852E-03 |
| Chr16 | 31217122 | 31217290 | 30  | 3.774E-01 | 3.388E-02 | -3.435E-01 | 0.000E+00 |
| Chr16 | 31301194 | 31301689 | 178 | 2.818E-01 | 1.803E-01 | -1.015E-01 | 2.761E-04 |
| Chr16 | 31346412 | 31346660 | 22  | 1.941E-01 | 2.270E-02 | -1.714E-01 | 7.400E-06 |
| Chr16 | 31384118 | 31384459 | 76  | 5.587E-01 | 3.157E-01 | -2.429E-01 | 4.860E-04 |
| Chr16 | 31415459 | 31415563 | 36  | 1.908E-01 | 4.701E-01 | 2.793E-01  | 9.000E-07 |
| Chr16 | 31570508 | 31570822 | 68  | 3.295E-01 | 2.099E-01 | -1.196E-01 | 1.657E-03 |
| Chr16 | 31682243 | 31682576 | 104 | 2.999E-01 | 9.173E-04 | -2.989E-01 | 0.000E+00 |
| Chr16 | 31691363 | 31691683 | 60  | 2.707E-01 | 1.360E-01 | -1.347E-01 | 7.295E-03 |
| Chr16 | 31700379 | 31700656 | 59  | 2.984E-01 | 8.336E-02 | -2.150E-01 | 2.950E-05 |
| Chr16 | 31718926 | 31719337 | 49  | 4.277E-01 | 2.917E-01 | -1.360E-01 | 1.145E-04 |
| Chr16 | 31731768 | 31732182 | 96  | 3.508E-01 | 1.928E-01 | -1.581E-01 | 1.900E-06 |
| Chr16 | 31748336 | 31748824 | 91  | 3.967E-01 | 4.995E-01 | 1.029E-01  | 3.583E-02 |
| Chr16 | 31758567 | 31758935 | 79  | 2.601E-01 | 4.252E-04 | -2.596E-01 | 0.000E+00 |
| Chr16 | 31759391 | 31759695 | 52  | 1.306E-02 | 1.717E-01 | 1.586E-01  | 1.000E-07 |
| Chr16 | 31761557 | 31762054 | 126 | 1.063E-01 | 7.225E-04 | -1.055E-01 | 3.934E-02 |
| Chr16 | 31765081 | 31765303 | 49  | 2.009E-01 | 7.696E-04 | -2.001E-01 | 1.900E-06 |
| Chr16 | 31783364 | 31783844 | 80  | 1.478E-01 | 3.122E-01 | 1.644E-01  | 1.465E-02 |
| Chr16 | 32159968 | 32160087 | 47  | 7.690E-01 | 4.818E-01 | -2.872E-01 | 6.880E-05 |
| Chr17 | 94553    | 95047    | 122 | 3.417E-01 | 2.105E-01 | -1.313E-01 | 8.610E-05 |
| Chr17 | 115604   | 116102   | 167 | 2.492E-01 | 1.471E-01 | -1.021E-01 | 3.795E-02 |
| Chr17 | 133093   | 133550   | 144 | 4.127E-01 | 2.646E-01 | -1.480E-01 | 1.057E-03 |
| Chr17 | 243404   | 243902   | 124 | 4.705E-01 | 2.427E-01 | -2.277E-01 | 1.155E-02 |
| Chr17 | 274385   | 274881   | 155 | 1.620E-01 | 2.662E-01 | 1.041E-01  | 9.743E-03 |
| Chr17 | 328350   | 328841   | 95  | 1.717E-01 | 2.728E-01 | 1.011E-01  | 3.993E-04 |
| Chr17 | 603914   | 604343   | 141 | 3.349E-01 | 1.588E-01 | -1.761E-01 | 5.000E-07 |
| Chr17 | 1046694  | 1046818  | 32  | 5.302E-01 | 2.597E-01 | -2.706E-01 | 2.534E-03 |

|       |         |         |     |           |           |            |           |
|-------|---------|---------|-----|-----------|-----------|------------|-----------|
| Chr17 | 1048161 | 1048564 | 86  | 1.682E-03 | 1.804E-01 | 1.787E-01  | 3.613E-03 |
| Chr17 | 1048669 | 1049165 | 96  | 4.315E-01 | 3.048E-01 | -1.266E-01 | 1.824E-04 |
| Chr17 | 1160684 | 1161160 | 99  | 3.851E-01 | 2.518E-01 | -1.334E-01 | 1.686E-02 |
| Chr17 | 1169554 | 1170041 | 141 | 3.605E-01 | 2.353E-01 | -1.252E-01 | 1.632E-04 |
| Chr17 | 1394033 | 1394517 | 172 | 1.528E-01 | 2.687E-01 | 1.158E-01  | 8.446E-03 |
| Chr17 | 1394568 | 1394988 | 99  | 1.357E-01 | 3.025E-01 | 1.667E-01  | 6.224E-03 |
| Chr17 | 1433594 | 1434090 | 143 | 2.677E-01 | 1.255E-01 | -1.422E-01 | 3.000E-07 |
| Chr17 | 1462497 | 1462993 | 229 | 4.887E-01 | 3.370E-01 | -1.516E-01 | 1.910E-04 |
| Chr17 | 1466483 | 1466965 | 146 | 3.049E-01 | 1.575E-01 | -1.474E-01 | 1.247E-04 |
| Chr17 | 1479938 | 1480432 | 153 | 2.918E-01 | 1.504E-01 | -1.413E-01 | 7.350E-05 |
| Chr17 | 1508450 | 1508946 | 163 | 8.596E-02 | 2.020E-01 | 1.160E-01  | 4.666E-03 |
| Chr17 | 1564860 | 1565342 | 143 | 3.169E-01 | 2.027E-01 | -1.143E-01 | 1.000E-07 |
| Chr17 | 1603898 | 1604391 | 113 | 3.978E-02 | 1.581E-01 | 1.183E-01  | 2.891E-02 |
| Chr17 | 1617252 | 1617742 | 139 | 3.546E-01 | 1.868E-01 | -1.679E-01 | 7.061E-04 |
| Chr17 | 1709206 | 1709655 | 157 | 1.477E-01 | 2.919E-01 | 1.443E-01  | 4.137E-02 |
| Chr17 | 1714591 | 1715038 | 155 | 4.721E-01 | 3.647E-01 | -1.073E-01 | 6.135E-03 |
| Chr17 | 1796503 | 1796992 | 97  | 3.565E-01 | 2.561E-01 | -1.003E-01 | 9.676E-03 |
| Chr17 | 1800172 | 1800524 | 85  | 3.638E-01 | 5.239E-01 | 1.600E-01  | 1.729E-02 |
| Chr17 | 1903734 | 1904231 | 139 | 3.006E-01 | 2.006E-01 | -1.000E-01 | 6.992E-04 |
| Chr17 | 1906735 | 1907222 | 111 | 1.989E-01 | 9.760E-02 | -1.013E-01 | 1.665E-03 |
| Chr17 | 1986589 | 1987084 | 151 | 2.268E-01 | 9.446E-02 | -1.323E-01 | 1.192E-03 |
| Chr17 | 1994554 | 1995043 | 98  | 4.160E-01 | 3.106E-01 | -1.055E-01 | 3.810E-04 |
| Chr17 | 2032585 | 2033023 | 124 | 2.109E-02 | 1.247E-01 | 1.036E-01  | 1.589E-02 |
| Chr17 | 2070235 | 2070720 | 157 | 3.789E-01 | 2.690E-01 | -1.099E-01 | 4.068E-03 |
| Chr17 | 2192285 | 2192784 | 144 | 3.065E-01 | 1.473E-01 | -1.592E-01 | 1.200E-06 |
| Chr17 | 2318784 | 2319013 | 77  | 2.270E-01 | 8.331E-02 | -1.437E-01 | 1.194E-03 |
| Chr17 | 2343430 | 2343531 | 24  | 8.245E-01 | 6.152E-01 | -2.093E-01 | 1.210E-05 |
| Chr17 | 2415606 | 2416040 | 123 | 3.023E-01 | 1.605E-01 | -1.417E-01 | 6.760E-04 |
| Chr17 | 2449796 | 2450292 | 158 | 2.707E-01 | 3.943E-01 | 1.236E-01  | 5.385E-03 |
| Chr17 | 2482029 | 2482286 | 42  | 3.396E-01 | 2.383E-01 | -1.013E-01 | 5.976E-04 |
| Chr17 | 2566099 | 2566595 | 141 | 3.059E-01 | 2.015E-01 | -1.044E-01 | 1.215E-04 |
| Chr17 | 2630014 | 2630498 | 135 | 3.863E-01 | 2.779E-01 | -1.084E-01 | 1.187E-02 |
| Chr17 | 2643389 | 2643848 | 166 | 2.803E-01 | 1.752E-01 | -1.051E-01 | 1.461E-02 |
| Chr17 | 2645704 | 2646166 | 220 | 2.170E-01 | 3.334E-02 | -1.837E-01 | 2.691E-03 |
| Chr17 | 2880086 | 2880573 | 159 | 3.435E-01 | 2.298E-01 | -1.137E-01 | 9.110E-04 |
| Chr17 | 2881089 | 2881540 | 147 | 4.863E-01 | 3.454E-01 | -1.409E-01 | 8.707E-04 |
| Chr17 | 2889853 | 2890347 | 118 | 4.361E-01 | 2.952E-01 | -1.410E-01 | 7.176E-03 |
| Chr17 | 3886715 | 3886788 | 35  | 2.500E-01 | 6.517E-02 | -1.848E-01 | 6.530E-05 |
| Chr17 | 4486555 | 4486952 | 42  | 3.661E-01 | 2.649E-01 | -1.012E-01 | 2.382E-02 |
| Chr17 | 4525245 | 4525404 | 50  | 8.308E-02 | 1.966E-01 | 1.135E-01  | 1.415E-02 |
| Chr17 | 4680695 | 4681193 | 130 | 2.839E-01 | 1.649E-01 | -1.190E-01 | 4.026E-02 |
| Chr17 | 5051053 | 5051416 | 38  | 1.793E-02 | 3.852E-01 | 3.673E-01  | 7.660E-05 |
| Chr17 | 5121419 | 5121917 | 69  | 4.296E-01 | 3.245E-01 | -1.051E-01 | 1.193E-02 |
| Chr17 | 5485802 | 5485967 | 36  | 6.843E-01 | 4.593E-01 | -2.250E-01 | 2.400E-06 |
| Chr17 | 5493441 | 5493821 | 153 | 5.912E-01 | 4.850E-01 | -1.062E-01 | 4.717E-02 |
| Chr17 | 5497632 | 5497756 | 20  | 7.433E-01 | 6.014E-01 | -1.420E-01 | 7.850E-03 |
| Chr17 | 5875585 | 5876078 | 168 | 8.040E-02 | 1.972E-01 | 1.168E-01  | 2.604E-02 |

|       |          |          |     |           |           |            |           |
|-------|----------|----------|-----|-----------|-----------|------------|-----------|
| Chr17 | 5933404  | 5933895  | 174 | 2.804E-01 | 1.235E-01 | -1.569E-01 | 1.070E-05 |
| Chr17 | 6371818  | 6372313  | 202 | 2.479E-01 | 3.493E-01 | 1.013E-01  | 3.170E-03 |
| Chr17 | 6754268  | 6754765  | 184 | 3.483E-01 | 2.301E-01 | -1.182E-01 | 6.110E-05 |
| Chr17 | 7435113  | 7435605  | 72  | 4.298E-01 | 3.036E-01 | -1.262E-01 | 5.548E-04 |
| Chr17 | 7564697  | 7565192  | 163 | 2.663E-01 | 1.623E-01 | -1.040E-01 | 2.753E-04 |
| Chr17 | 8219836  | 8220329  | 173 | 3.263E-01 | 2.073E-01 | -1.191E-01 | 9.340E-05 |
| Chr17 | 8462586  | 8463080  | 132 | 4.891E-01 | 3.725E-01 | -1.166E-01 | 8.000E-07 |
| Chr17 | 8912408  | 8912812  | 62  | 3.314E-01 | 6.734E-01 | 3.420E-01  | 4.077E-02 |
| Chr17 | 9495698  | 9496188  | 221 | 3.649E-01 | 2.628E-01 | -1.020E-01 | 2.390E-02 |
| Chr17 | 9797176  | 9797652  | 95  | 1.567E-02 | 1.350E-01 | 1.193E-01  | 1.670E-02 |
| Chr17 | 9871189  | 9871679  | 76  | 7.170E-01 | 5.080E-01 | -2.090E-01 | 4.000E-07 |
| Chr17 | 9923229  | 9923728  | 179 | 1.553E-01 | 4.149E-02 | -1.138E-01 | 3.116E-02 |
| Chr17 | 9997658  | 9998113  | 115 | 3.599E-01 | 2.403E-01 | -1.196E-01 | 4.610E-05 |
| Chr17 | 10041602 | 10042039 | 72  | 1.632E-01 | 5.027E-02 | -1.130E-01 | 1.772E-03 |
| Chr17 | 10164236 | 10164726 | 147 | 3.514E-01 | 1.739E-01 | -1.775E-01 | 2.714E-02 |
| Chr17 | 10213446 | 10213935 | 43  | 1.575E-01 | 1.376E-02 | -1.437E-01 | 9.842E-04 |
| Chr17 | 10240849 | 10241293 | 165 | 1.592E-01 | 4.343E-02 | -1.158E-01 | 7.265E-03 |
| Chr17 | 10281054 | 10281544 | 89  | 4.386E-01 | 3.326E-01 | -1.060E-01 | 1.400E-06 |
| Chr17 | 10501026 | 10501523 | 221 | 2.291E-01 | 1.237E-01 | -1.053E-01 | 5.857E-04 |
| Chr17 | 10713813 | 10714146 | 69  | 9.143E-02 | 2.068E-01 | 1.154E-01  | 3.080E-05 |
| Chr17 | 10717571 | 10717763 | 29  | 4.558E-01 | 2.439E-01 | -2.119E-01 | 1.900E-06 |
| Chr17 | 10728042 | 10728530 | 129 | 2.972E-01 | 1.258E-01 | -1.713E-01 | 1.120E-03 |
| Chr17 | 11255300 | 11255795 | 126 | 1.123E-01 | 1.045E-02 | -1.019E-01 | 8.232E-03 |
| Chr17 | 11635748 | 11636222 | 133 | 2.534E-01 | 1.125E-01 | -1.409E-01 | 2.831E-03 |
| Chr17 | 11735867 | 11736343 | 87  | 7.157E-02 | 2.828E-01 | 2.112E-01  | 1.000E-07 |
| Chr17 | 11737297 | 11737700 | 113 | 1.482E-01 | 2.662E-01 | 1.179E-01  | 3.157E-03 |
| Chr17 | 11740156 | 11740626 | 65  | 3.215E-02 | 3.971E-01 | 3.649E-01  | 0.000E+00 |
| Chr17 | 11745073 | 11745558 | 126 | 1.210E-01 | 2.442E-01 | 1.231E-01  | 9.371E-03 |
| Chr17 | 11915760 | 11916256 | 186 | 3.884E-01 | 2.830E-01 | -1.055E-01 | 4.003E-04 |
| Chr17 | 11916756 | 11917254 | 159 | 3.410E-01 | 2.398E-01 | -1.012E-01 | 3.135E-04 |
| Chr17 | 11917756 | 11918251 | 164 | 3.868E-01 | 2.712E-01 | -1.155E-01 | 1.800E-05 |
| Chr17 | 11918259 | 11918753 | 179 | 3.469E-01 | 2.466E-01 | -1.003E-01 | 2.092E-03 |
| Chr17 | 11958669 | 11959151 | 150 | 2.818E-01 | 1.784E-01 | -1.035E-01 | 1.300E-05 |
| Chr17 | 12060700 | 12061191 | 143 | 4.487E-02 | 2.150E-01 | 1.701E-01  | 8.250E-05 |
| Chr17 | 12311144 | 12311308 | 36  | 3.502E-01 | 1.339E-01 | -2.163E-01 | 5.810E-05 |
| Chr17 | 12324599 | 12324708 | 17  | 9.278E-01 | 6.626E-01 | -2.652E-01 | 2.600E-06 |
| Chr18 | 82510    | 83005    | 151 | 2.139E-01 | 9.057E-02 | -1.233E-01 | 1.277E-03 |
| Chr18 | 117681   | 117959   | 56  | 5.098E-01 | 6.802E-01 | 1.704E-01  | 7.384E-03 |
| Chr18 | 118567   | 119060   | 120 | 3.983E-01 | 2.656E-01 | -1.327E-01 | 1.159E-04 |
| Chr18 | 877533   | 878020   | 132 | 7.947E-04 | 1.821E-01 | 1.813E-01  | 0.000E+00 |
| Chr18 | 903025   | 903519   | 181 | 2.917E-01 | 1.839E-01 | -1.078E-01 | 1.710E-04 |
| Chr18 | 948523   | 949018   | 140 | 2.603E-01 | 1.526E-01 | -1.077E-01 | 6.117E-03 |
| Chr18 | 977019   | 977517   | 164 | 3.936E-01 | 2.556E-01 | -1.381E-01 | 8.944E-04 |
| Chr18 | 1067612  | 1068108  | 128 | 3.613E-01 | 2.432E-01 | -1.181E-01 | 2.200E-06 |
| Chr18 | 1171510  | 1172005  | 98  | 2.147E-01 | 9.944E-02 | -1.152E-01 | 2.499E-02 |
| Chr18 | 1260256  | 1260750  | 142 | 4.223E-01 | 6.281E-01 | 2.058E-01  | 4.434E-02 |
| Chr18 | 1354263  | 1354760  | 153 | 2.691E-01 | 1.586E-01 | -1.105E-01 | 5.376E-03 |

|       |          |          |     |           |           |            |           |
|-------|----------|----------|-----|-----------|-----------|------------|-----------|
| Chr18 | 1661250  | 1661739  | 146 | 4.103E-01 | 3.001E-01 | -1.102E-01 | 3.569E-04 |
| Chr18 | 1758464  | 1758961  | 182 | 4.598E-01 | 3.110E-01 | -1.488E-01 | 1.000E-06 |
| Chr18 | 1761462  | 1761892  | 115 | 4.324E-01 | 2.985E-01 | -1.339E-01 | 2.158E-02 |
| Chr18 | 2112324  | 2112811  | 191 | 2.910E-01 | 1.858E-01 | -1.052E-01 | 3.277E-03 |
| Chr18 | 2277041  | 2277529  | 167 | 3.990E-01 | 2.959E-01 | -1.031E-01 | 8.860E-05 |
| Chr18 | 2717150  | 2717645  | 124 | 1.298E-01 | 2.345E-01 | 1.047E-01  | 1.399E-03 |
| Chr18 | 3405166  | 3405642  | 154 | 2.565E-01 | 1.485E-01 | -1.081E-01 | 2.030E-05 |
| Chr18 | 4134009  | 4134500  | 191 | 1.538E-01 | 3.076E-01 | 1.538E-01  | 0.000E+00 |
| Chr18 | 4183464  | 4183927  | 136 | 5.681E-01 | 4.628E-01 | -1.053E-01 | 4.110E-05 |
| Chr18 | 4239197  | 4239692  | 115 | 3.474E-01 | 2.006E-01 | -1.468E-01 | 1.096E-02 |
| Chr18 | 4725617  | 4726059  | 152 | 4.393E-01 | 3.223E-01 | -1.170E-01 | 4.745E-02 |
| Chr18 | 5109428  | 5109633  | 30  | 4.124E-01 | 2.863E-01 | -1.261E-01 | 5.193E-04 |
| Chr18 | 5412754  | 5413192  | 88  | 3.693E-01 | 2.269E-01 | -1.424E-01 | 1.027E-04 |
| Chr18 | 5782547  | 5783040  | 235 | 3.823E-01 | 2.634E-01 | -1.189E-01 | 5.950E-04 |
| Chr18 | 6768156  | 6768651  | 107 | 2.164E-01 | 9.602E-02 | -1.204E-01 | 8.634E-03 |
| Chr18 | 6879213  | 6879656  | 85  | 5.682E-01 | 4.382E-01 | -1.300E-01 | 4.200E-06 |
| Chr18 | 7320809  | 7321287  | 190 | 4.556E-01 | 2.988E-01 | -1.568E-01 | 0.000E+00 |
| Chr18 | 8367315  | 8367807  | 147 | 4.531E-01 | 3.495E-01 | -1.035E-01 | 6.000E-07 |
| Chr18 | 9188268  | 9188524  | 30  | 4.357E-01 | 3.270E-01 | -1.086E-01 | 1.016E-02 |
| Chr18 | 9217286  | 9217779  | 136 | 3.648E-01 | 1.925E-01 | -1.722E-01 | 3.900E-06 |
| Chr18 | 9280436  | 9280832  | 114 | 3.292E-01 | 2.228E-01 | -1.064E-01 | 0.000E+00 |
| Chr18 | 9606705  | 9606974  | 48  | 2.363E-01 | 9.195E-02 | -1.444E-01 | 1.900E-06 |
| Chr18 | 9689605  | 9689973  | 71  | 3.919E-01 | 1.902E-01 | -2.017E-01 | 1.840E-05 |
| Chr18 | 9815671  | 9816166  | 184 | 3.500E-01 | 2.288E-01 | -1.212E-01 | 1.002E-02 |
| Chr18 | 9830563  | 9831052  | 203 | 3.480E-01 | 2.473E-01 | -1.007E-01 | 2.702E-02 |
| Chr18 | 9861274  | 9861755  | 128 | 4.211E-01 | 2.835E-01 | -1.375E-01 | 4.838E-04 |
| Chr18 | 9901887  | 9902383  | 193 | 3.101E-01 | 1.724E-01 | -1.377E-01 | 1.246E-02 |
| Chr18 | 10110992 | 10111487 | 136 | 5.764E-01 | 4.669E-01 | -1.095E-01 | 0.000E+00 |
| Chr18 | 10418647 | 10419143 | 161 | 4.089E-01 | 2.992E-01 | -1.097E-01 | 5.434E-03 |
| Chr18 | 10426739 | 10427212 | 97  | 1.218E-01 | 2.720E-01 | 1.502E-01  | 5.587E-04 |
| Chr18 | 10520443 | 10520929 | 148 | 3.039E-01 | 2.037E-01 | -1.002E-01 | 0.000E+00 |
| Chr18 | 10775656 | 10776153 | 147 | 2.779E-01 | 1.703E-01 | -1.077E-01 | 1.264E-02 |
| Chr18 | 11138470 | 11138727 | 39  | 4.700E-01 | 6.174E-01 | 1.474E-01  | 3.068E-03 |
| Chr18 | 11169601 | 11170096 | 165 | 1.490E-01 | 3.208E-02 | -1.169E-01 | 6.400E-03 |
| Chr18 | 11219077 | 11219559 | 108 | 4.618E-01 | 3.456E-01 | -1.162E-01 | 1.470E-05 |
| Chr18 | 11230886 | 11231381 | 172 | 2.697E-01 | 1.101E-01 | -1.596E-01 | 4.502E-04 |
| Chr18 | 11231383 | 11231873 | 197 | 2.114E-01 | 6.002E-02 | -1.514E-01 | 7.360E-04 |
| Chr18 | 11231886 | 11232373 | 191 | 3.393E-01 | 1.773E-01 | -1.620E-01 | 1.653E-02 |
| Chr18 | 11290888 | 11291384 | 188 | 2.921E-01 | 1.538E-01 | -1.383E-01 | 1.839E-03 |
| Chr18 | 11372670 | 11373057 | 45  | 5.348E-01 | 4.083E-01 | -1.266E-01 | 1.266E-03 |
| Chr18 | 11637195 | 11637428 | 35  | 3.720E-04 | 2.950E-01 | 2.946E-01  | 0.000E+00 |
| Chr18 | 11640376 | 11640815 | 169 | 3.025E-01 | 1.028E-01 | -1.997E-01 | 7.643E-03 |
| Chr18 | 11645056 | 11645519 | 97  | 5.884E-01 | 4.787E-01 | -1.097E-01 | 7.397E-03 |
| Chr18 | 11704929 | 11705398 | 142 | 2.240E-01 | 2.909E-02 | -1.949E-01 | 2.110E-02 |
| Chr18 | 11707776 | 11708250 | 111 | 2.076E-01 | 3.515E-01 | 1.439E-01  | 1.401E-02 |
| Chr18 | 11713824 | 11714277 | 80  | 2.274E-01 | 1.072E-01 | -1.202E-01 | 9.890E-05 |
| Chr19 | 6131     | 6617     | 142 | 3.066E-01 | 1.569E-01 | -1.497E-01 | 1.784E-02 |

|       |         |         |     |           |           |            |           |
|-------|---------|---------|-----|-----------|-----------|------------|-----------|
| Chr19 | 135778  | 136273  | 199 | 1.153E-01 | 2.185E-01 | 1.032E-01  | 3.030E-05 |
| Chr19 | 341645  | 342143  | 187 | 4.406E-01 | 2.450E-01 | -1.956E-01 | 3.141E-03 |
| Chr19 | 459254  | 459475  | 56  | 2.860E-01 | 1.086E-01 | -1.773E-01 | 2.000E-07 |
| Chr19 | 580329  | 580734  | 34  | 1.397E-01 | 2.354E-02 | -1.162E-01 | 1.575E-03 |
| Chr19 | 657582  | 658064  | 132 | 1.463E-01 | 2.093E-02 | -1.254E-01 | 7.761E-03 |
| Chr19 | 768503  | 768999  | 162 | 2.818E-01 | 1.365E-01 | -1.454E-01 | 4.542E-02 |
| Chr19 | 890210  | 890680  | 141 | 2.598E-01 | 1.595E-01 | -1.004E-01 | 4.158E-02 |
| Chr19 | 992220  | 992705  | 77  | 3.425E-01 | 2.332E-01 | -1.093E-01 | 5.636E-04 |
| Chr19 | 1034484 | 1034600 | 27  | 2.246E-01 | 9.430E-02 | -1.303E-01 | 5.711E-04 |
| Chr19 | 2131273 | 2131748 | 140 | 3.022E-01 | 1.204E-01 | -1.818E-01 | 2.723E-03 |
| Chr19 | 2134244 | 2134632 | 53  | 4.698E-01 | 3.566E-01 | -1.133E-01 | 4.786E-02 |
| Chr19 | 2135618 | 2136045 | 152 | 9.757E-02 | 2.720E-01 | 1.745E-01  | 6.730E-05 |
| Chr19 | 2191317 | 2191695 | 65  | 2.109E-01 | 8.538E-02 | -1.255E-01 | 5.117E-03 |
| Chr19 | 2205572 | 2205790 | 42  | 3.156E-01 | 7.633E-02 | -2.392E-01 | 0.000E+00 |
| Chr19 | 2206313 | 2206498 | 57  | 2.999E-01 | 1.873E-01 | -1.126E-01 | 3.986E-02 |
| Chr19 | 2226601 | 2227006 | 88  | 5.050E-01 | 3.119E-01 | -1.931E-01 | 1.000E-06 |
| Chr19 | 2274136 | 2274594 | 140 | 6.315E-01 | 5.188E-01 | -1.127E-01 | 8.600E-06 |
| Chr19 | 2318774 | 2319174 | 83  | 3.928E-01 | 2.529E-01 | -1.398E-01 | 4.339E-02 |
| Chr19 | 2399267 | 2399747 | 105 | 8.950E-02 | 1.899E-01 | 1.004E-01  | 1.877E-02 |
| Chr19 | 2462751 | 2463237 | 157 | 4.605E-01 | 2.991E-01 | -1.614E-01 | 4.804E-03 |
| Chr19 | 2474907 | 2475392 | 104 | 4.018E-01 | 2.664E-01 | -1.354E-01 | 4.100E-02 |
| Chr19 | 2485911 | 2486363 | 100 | 3.812E-01 | 1.981E-01 | -1.831E-01 | 2.755E-04 |
| Chr19 | 2497195 | 2497314 | 20  | 1.934E-01 | 4.022E-01 | 2.088E-01  | 9.466E-04 |
| Chr19 | 2503792 | 2504276 | 126 | 2.967E-01 | 1.251E-01 | -1.716E-01 | 3.803E-02 |
| Chr19 | 2523581 | 2524072 | 125 | 3.062E-01 | 1.758E-01 | -1.304E-01 | 5.654E-04 |
| Chr19 | 2662555 | 2663006 | 64  | 4.628E-01 | 3.417E-01 | -1.211E-01 | 9.853E-04 |
| Chr19 | 2743875 | 2744363 | 140 | 3.111E-01 | 2.023E-01 | -1.088E-01 | 4.400E-06 |
| Chr19 | 2757092 | 2757571 | 191 | 2.955E-01 | 1.652E-01 | -1.303E-01 | 9.795E-03 |
| Chr19 | 2804569 | 2805032 | 93  | 3.601E-01 | 2.336E-01 | -1.265E-01 | 1.054E-03 |
| Chr19 | 2896829 | 2897323 | 94  | 5.329E-01 | 3.994E-01 | -1.334E-01 | 2.929E-02 |
| Chr19 | 3263267 | 3263690 | 85  | 3.037E-01 | 2.018E-01 | -1.019E-01 | 3.468E-02 |
| Chr19 | 3286374 | 3286863 | 172 | 4.130E-01 | 3.113E-01 | -1.017E-01 | 3.160E-03 |
| Chr19 | 3337381 | 3337874 | 86  | 2.858E-01 | 1.790E-01 | -1.068E-01 | 2.798E-02 |
| Chr19 | 3372175 | 3372669 | 72  | 4.746E-01 | 3.559E-01 | -1.187E-01 | 2.240E-02 |
| Chr19 | 3476258 | 3476754 | 180 | 2.559E-01 | 1.381E-01 | -1.178E-01 | 6.720E-05 |
| Chr19 | 3532052 | 3532541 | 176 | 2.913E-01 | 1.750E-01 | -1.163E-01 | 1.183E-02 |
| Chr19 | 3908313 | 3908808 | 139 | 3.319E-02 | 1.343E-01 | 1.011E-01  | 2.049E-02 |
| Chr19 | 4131432 | 4131921 | 153 | 3.511E-01 | 2.456E-01 | -1.055E-01 | 9.640E-05 |
| Chr19 | 4287234 | 4287714 | 146 | 3.477E-01 | 2.380E-01 | -1.096E-01 | 3.500E-06 |
| Chr19 | 5360988 | 5361487 | 187 | 6.135E-01 | 4.491E-01 | -1.644E-01 | 5.121E-04 |
| Chr19 | 5732866 | 5733356 | 180 | 3.767E-01 | 2.210E-01 | -1.557E-01 | 2.031E-02 |
| Chr19 | 6018987 | 6019480 | 106 | 3.523E-01 | 2.419E-01 | -1.104E-01 | 6.400E-05 |
| Chr19 | 6027946 | 6028439 | 98  | 3.888E-01 | 2.874E-01 | -1.014E-01 | 1.318E-04 |
| Chr19 | 6090340 | 6090632 | 33  | 2.535E-01 | 3.814E-01 | 1.279E-01  | 3.372E-02 |
| Chr19 | 6118910 | 6119389 | 154 | 2.048E-01 | 5.597E-02 | -1.488E-01 | 2.320E-02 |
| Chr19 | 6119391 | 6119883 | 144 | 1.549E-01 | 4.865E-02 | -1.062E-01 | 2.475E-02 |
| Chr19 | 6799903 | 6800293 | 65  | 4.460E-01 | 2.326E-01 | -2.135E-01 | 6.820E-05 |

|              |          |          |     |           |           |            |           |
|--------------|----------|----------|-----|-----------|-----------|------------|-----------|
| Chr19        | 6916005  | 6916410  | 35  | 3.322E-01 | 2.207E-01 | -1.116E-01 | 2.229E-02 |
| Chr19        | 6939103  | 6939403  | 116 | 3.520E-01 | 4.579E-01 | 1.058E-01  | 8.593E-03 |
| Chr19        | 7146091  | 7146584  | 206 | 3.414E-01 | 2.264E-01 | -1.150E-01 | 1.010E-05 |
| Chr19        | 7283442  | 7283925  | 153 | 3.835E-01 | 2.746E-01 | -1.089E-01 | 6.820E-05 |
| Chr19        | 7789202  | 7789518  | 127 | 3.256E-01 | 4.410E-01 | 1.154E-01  | 7.660E-03 |
| Chr19        | 7798289  | 7798567  | 40  | 3.233E-01 | 4.318E-01 | 1.085E-01  | 3.950E-02 |
| Chr19        | 7813365  | 7813496  | 37  | 3.656E-01 | 4.982E-01 | 1.325E-01  | 2.605E-03 |
| Chr19        | 7851527  | 7851984  | 208 | 3.998E-01 | 2.577E-01 | -1.421E-01 | 4.594E-02 |
| Chr19        | 8217198  | 8217681  | 62  | 2.216E-01 | 3.533E-01 | 1.316E-01  | 2.933E-04 |
| Chr19        | 8471481  | 8471978  | 202 | 1.679E-01 | 6.105E-02 | -1.069E-01 | 1.269E-03 |
| Chr19        | 8711401  | 8711892  | 79  | 1.972E-01 | 8.080E-02 | -1.164E-01 | 1.160E-05 |
| Chr19        | 8781731  | 8782210  | 103 | 3.265E-01 | 2.205E-01 | -1.060E-01 | 8.594E-03 |
| Chr19        | 8945505  | 8945993  | 97  | 4.788E-01 | 3.747E-01 | -1.041E-01 | 2.057E-02 |
| Chr19        | 8956477  | 8956958  | 131 | 2.518E-01 | 1.466E-01 | -1.052E-01 | 1.714E-02 |
| Chr19        | 8970929  | 8971404  | 143 | 4.115E-01 | 1.710E-01 | -2.405E-01 | 7.995E-04 |
| Chr19        | 8971429  | 8971924  | 147 | 3.293E-01 | 4.457E-01 | 1.164E-01  | 2.143E-03 |
| Chr19        | 9038106  | 9038604  | 180 | 3.602E-01 | 1.981E-01 | -1.620E-01 | 4.442E-04 |
| Chr19        | 9234358  | 9234846  | 183 | 2.539E-01 | 1.213E-01 | -1.326E-01 | 8.890E-05 |
| Chr19        | 9913162  | 9913659  | 152 | 5.317E-01 | 4.200E-01 | -1.117E-01 | 1.980E-05 |
| Chr19        | 10080295 | 10080792 | 184 | 3.048E-01 | 1.933E-01 | -1.115E-01 | 5.800E-06 |
| Chr19        | 10637766 | 10638263 | 198 | 2.576E-01 | 1.203E-01 | -1.374E-01 | 3.117E-02 |
| Chr19        | 10759756 | 10760244 | 135 | 4.973E-01 | 3.863E-01 | -1.110E-01 | 2.270E-05 |
| Chr19        | 11275334 | 11275831 | 200 | 3.573E-01 | 2.441E-01 | -1.132E-01 | 1.507E-03 |
| Chr19        | 11334577 | 11335067 | 111 | 1.927E-01 | 7.660E-02 | -1.161E-01 | 1.906E-03 |
| Chr19        | 11495951 | 11496445 | 166 | 3.508E-01 | 1.949E-01 | -1.560E-01 | 5.114E-03 |
| Chr19        | 11722501 | 11722998 | 157 | 4.207E-01 | 3.151E-01 | -1.057E-01 | 1.101E-04 |
| Chr19        | 11854112 | 11854604 | 251 | 2.641E-01 | 1.741E-02 | -2.467E-01 | 1.715E-03 |
| Chr19        | 11873054 | 11873536 | 145 | 3.001E-01 | 1.711E-01 | -1.290E-01 | 3.223E-03 |
| Chr19        | 11998798 | 11999290 | 169 | 3.097E-01 | 2.036E-01 | -1.061E-01 | 5.000E-07 |
| Chr19        | 12006247 | 12006736 | 147 | 3.544E-01 | 2.499E-01 | -1.045E-01 | 2.472E-03 |
| Chr19        | 12018159 | 12018646 | 146 | 2.873E-01 | 1.845E-01 | -1.028E-01 | 1.200E-06 |
| Chr19        | 12124097 | 12124546 | 97  | 2.910E-01 | 4.513E-01 | 1.603E-01  | 3.159E-02 |
| Chr19        | 12238380 | 12238870 | 151 | 3.177E-01 | 1.835E-01 | -1.342E-01 | 3.000E-07 |
| Chr19        | 12244858 | 12245352 | 88  | 3.474E-01 | 2.126E-01 | -1.348E-01 | 1.196E-03 |
| Chr19        | 12359515 | 12360012 | 176 | 2.623E-01 | 1.424E-01 | -1.199E-01 | 1.764E-02 |
| Chr19        | 12428699 | 12429192 | 88  | 1.420E-01 | 1.734E-02 | -1.247E-01 | 3.233E-03 |
| Chr19        | 12455930 | 12456417 | 164 | 1.572E-01 | 5.041E-02 | -1.068E-01 | 2.560E-02 |
| Chr19        | 12459115 | 12459267 | 26  | 4.292E-01 | 2.874E-01 | -1.418E-01 | 3.164E-02 |
| Chr19        | 12512657 | 12513149 | 177 | 1.316E-01 | 7.535E-03 | -1.240E-01 | 3.319E-02 |
| Chr19        | 12567524 | 12568017 | 136 | 2.002E-01 | 9.856E-02 | -1.017E-01 | 9.631E-04 |
| Chr19        | 12583461 | 12583953 | 206 | 4.447E-01 | 3.214E-01 | -1.233E-01 | 2.100E-02 |
| Chr19        | 13161596 | 13162092 | 174 | 2.848E-01 | 1.478E-01 | -1.370E-01 | 3.418E-02 |
| Chr19        | 13173063 | 13173561 | 203 | 3.056E-01 | 1.285E-01 | -1.771E-01 | 7.791E-03 |
| Chr19        | 13362564 | 13363053 | 111 | 2.569E-01 | 1.438E-01 | -1.131E-01 | 1.453E-04 |
| Chr19        | 13378580 | 13378762 | 30  | 2.528E-01 | 1.143E-01 | -1.385E-01 | 4.177E-04 |
| Chr19        | 13555986 | 13556332 | 71  | 3.497E-01 | 2.442E-01 | -1.055E-01 | 5.650E-03 |
| scaffold_104 | 160334   | 160815   | 125 | 4.693E-01 | 3.553E-01 | -1.140E-01 | 1.135E-03 |

|              |        |        |     |           |           |            |           |
|--------------|--------|--------|-----|-----------|-----------|------------|-----------|
| scaffold_104 | 256507 | 256799 | 40  | 4.008E-01 | 1.773E-01 | -2.235E-01 | 1.000E-07 |
| scaffold_104 | 304393 | 304674 | 33  | 2.047E-01 | 2.253E-02 | -1.822E-01 | 1.700E-06 |
| scaffold_109 | 4541   | 4939   | 142 | 6.260E-01 | 7.387E-01 | 1.127E-01  | 1.439E-02 |
| scaffold_109 | 5821   | 6137   | 45  | 8.018E-01 | 5.932E-01 | -2.086E-01 | 3.076E-04 |
| scaffold_109 | 9580   | 9633   | 21  | 4.256E-01 | 5.904E-01 | 1.648E-01  | 7.782E-03 |
| scaffold_109 | 12858  | 13345  | 132 | 6.692E-01 | 5.586E-01 | -1.107E-01 | 4.307E-02 |
| scaffold_109 | 16207  | 16365  | 46  | 5.250E-01 | 7.078E-01 | 1.829E-01  | 5.337E-04 |
| scaffold_109 | 16782  | 17048  | 89  | 5.393E-01 | 6.504E-01 | 1.111E-01  | 2.279E-02 |
| scaffold_109 | 19995  | 20345  | 65  | 6.526E-01 | 5.378E-01 | -1.148E-01 | 7.979E-04 |
| scaffold_109 | 22321  | 22772  | 178 | 5.080E-01 | 6.334E-01 | 1.254E-01  | 1.561E-02 |
| scaffold_109 | 23238  | 23684  | 56  | 7.134E-01 | 8.896E-01 | 1.762E-01  | 2.417E-03 |
| scaffold_109 | 84100  | 84365  | 119 | 5.693E-01 | 4.135E-01 | -1.559E-01 | 6.100E-03 |
| scaffold_109 | 90379  | 90444  | 35  | 3.100E-01 | 7.871E-04 | -3.092E-01 | 0.000E+00 |
| scaffold_109 | 174761 | 175175 | 126 | 5.244E-01 | 6.626E-01 | 1.382E-01  | 2.654E-02 |
| scaffold_109 | 239711 | 240009 | 63  | 3.784E-01 | 6.256E-01 | 2.472E-01  | 1.000E-06 |
| scaffold_109 | 241306 | 241663 | 134 | 4.427E-01 | 5.754E-01 | 1.327E-01  | 3.564E-02 |
| scaffold_109 | 242115 | 242253 | 44  | 5.377E-01 | 2.925E-01 | -2.451E-01 | 3.040E-05 |
| scaffold_109 | 242839 | 243227 | 75  | 7.279E-01 | 8.757E-01 | 1.477E-01  | 8.201E-04 |
| scaffold_109 | 245836 | 246032 | 65  | 6.420E-01 | 4.486E-01 | -1.934E-01 | 3.300E-05 |
| scaffold_109 | 246288 | 246724 | 92  | 7.182E-01 | 5.694E-01 | -1.488E-01 | 4.017E-04 |
| scaffold_109 | 247347 | 247790 | 60  | 8.126E-01 | 3.204E-01 | -4.922E-01 | 0.000E+00 |
| scaffold_109 | 253178 | 253516 | 105 | 5.456E-01 | 7.102E-01 | 1.646E-01  | 2.696E-02 |
| scaffold_122 | 136298 | 136793 | 114 | 5.583E-01 | 4.577E-01 | -1.005E-01 | 1.547E-02 |
| scaffold_125 | 144138 | 144633 | 225 | 4.757E-01 | 3.710E-01 | -1.047E-01 | 6.260E-05 |
| scaffold_125 | 187517 | 187998 | 113 | 2.891E-01 | 1.559E-01 | -1.332E-01 | 4.376E-02 |
| scaffold_125 | 198869 | 199128 | 76  | 3.170E-01 | 2.152E-01 | -1.018E-01 | 4.242E-04 |
| scaffold_151 | 29128  | 29351  | 38  | 1.853E-01 | 8.133E-02 | -1.039E-01 | 5.805E-04 |
| scaffold_151 | 160760 | 161248 | 196 | 4.448E-01 | 2.073E-01 | -2.375E-01 | 3.070E-05 |
| scaffold_160 | 7353   | 7477   | 26  | 3.426E-01 | 1.208E-01 | -2.219E-01 | 1.872E-03 |
| scaffold_160 | 32322  | 32750  | 62  | 3.615E-04 | 1.387E-01 | 1.384E-01  | 0.000E+00 |
| scaffold_160 | 47191  | 47546  | 72  | 2.800E-01 | 1.370E-01 | -1.429E-01 | 5.850E-05 |
| scaffold_160 | 99018  | 99338  | 52  | 5.504E-04 | 1.560E-01 | 1.554E-01  | 0.000E+00 |
| scaffold_160 | 127066 | 127493 | 66  | 2.696E-01 | 1.080E-01 | -1.617E-01 | 7.000E-07 |
| scaffold_160 | 187309 | 187681 | 50  | 1.455E-02 | 2.100E-01 | 1.954E-01  | 1.177E-02 |
| scaffold_165 | 57304  | 57789  | 196 | 1.283E-01 | 2.508E-01 | 1.225E-01  | 4.420E-02 |
| scaffold_165 | 67571  | 68048  | 84  | 3.805E-01 | 1.143E-01 | -2.661E-01 | 2.440E-05 |
| scaffold_165 | 89305  | 89771  | 86  | 2.520E-01 | 3.700E-01 | 1.180E-01  | 1.780E-02 |
| scaffold_165 | 110596 | 111089 | 73  | 5.563E-01 | 3.429E-01 | -2.134E-01 | 7.170E-04 |
| scaffold_165 | 146811 | 147286 | 90  | 6.716E-02 | 1.824E-01 | 1.152E-01  | 5.190E-05 |
| scaffold_167 | 158117 | 158457 | 47  | 2.495E-01 | 1.197E-01 | -1.298E-01 | 2.305E-03 |
| scaffold_167 | 173237 | 173445 | 40  | 1.688E-01 | 2.829E-01 | 1.141E-01  | 1.763E-02 |
| scaffold_167 | 181243 | 181595 | 68  | 3.492E-01 | 2.407E-01 | -1.085E-01 | 1.066E-02 |
| scaffold_168 | 22069  | 22477  | 72  | 1.486E-01 | 3.262E-02 | -1.160E-01 | 3.731E-03 |
| scaffold_168 | 34484  | 34771  | 78  | 5.336E-03 | 2.392E-01 | 2.339E-01  | 0.000E+00 |
| scaffold_168 | 35288  | 35470  | 34  | 1.028E-01 | 2.319E-01 | 1.290E-01  | 3.282E-04 |
| scaffold_168 | 42207  | 42657  | 72  | 3.101E-02 | 2.064E-01 | 1.754E-01  | 1.500E-06 |
| scaffold_168 | 48146  | 48532  | 66  | 8.193E-02 | 2.363E-01 | 1.544E-01  | 4.450E-02 |

|              |        |        |     |           |           |            |           |
|--------------|--------|--------|-----|-----------|-----------|------------|-----------|
| scaffold_168 | 59806  | 60208  | 58  | 3.152E-01 | 2.065E-01 | -1.086E-01 | 6.436E-03 |
| scaffold_168 | 64378  | 64550  | 48  | 3.500E-04 | 1.502E-01 | 1.498E-01  | 1.009E-04 |
| scaffold_168 | 82184  | 82508  | 46  | 1.559E-01 | 3.993E-01 | 2.434E-01  | 1.735E-02 |
| scaffold_168 | 84488  | 84887  | 91  | 5.717E-02 | 2.721E-01 | 2.149E-01  | 4.690E-05 |
| scaffold_168 | 95427  | 95836  | 106 | 1.798E-04 | 1.095E-01 | 1.093E-01  | 2.852E-02 |
| scaffold_168 | 134051 | 134539 | 86  | 5.869E-01 | 4.388E-01 | -1.481E-01 | 6.199E-04 |
| scaffold_168 | 151972 | 152461 | 114 | 1.427E-01 | 2.770E-01 | 1.343E-01  | 8.761E-03 |
| scaffold_168 | 152472 | 152961 | 114 | 3.530E-02 | 1.496E-01 | 1.143E-01  | 2.910E-05 |
| scaffold_168 | 155427 | 155844 | 59  | 1.903E-01 | 6.858E-02 | -1.217E-01 | 7.062E-03 |
| scaffold_168 | 156411 | 156654 | 57  | 9.085E-02 | 2.144E-01 | 1.235E-01  | 1.132E-02 |
| scaffold_168 | 170179 | 170669 | 166 | 8.636E-02 | 1.865E-01 | 1.001E-01  | 9.335E-03 |
| scaffold_168 | 171737 | 172045 | 61  | 1.357E-01 | 3.208E-01 | 1.851E-01  | 5.970E-03 |
| scaffold_168 | 172047 | 172355 | 101 | 5.776E-02 | 2.354E-01 | 1.776E-01  | 2.682E-03 |
| scaffold_168 | 172758 | 173074 | 100 | 1.151E-01 | 2.422E-01 | 1.271E-01  | 7.599E-03 |
| scaffold_168 | 186587 | 186829 | 42  | 2.926E-02 | 1.917E-01 | 1.624E-01  | 3.700E-06 |
| scaffold_172 | 74882  | 75369  | 144 | 1.640E-01 | 2.697E-01 | 1.056E-01  | 4.740E-04 |
| scaffold_172 | 167938 | 168414 | 155 | 1.007E-01 | 2.174E-01 | 1.167E-01  | 8.817E-03 |
| scaffold_174 | 58181  | 58555  | 82  | 4.428E-02 | 2.003E-01 | 1.560E-01  | 0.000E+00 |
| scaffold_176 | 83023  | 83513  | 174 | 3.736E-01 | 2.566E-01 | -1.170E-01 | 3.400E-06 |
| scaffold_176 | 160175 | 160510 | 82  | 6.380E-01 | 4.719E-01 | -1.662E-01 | 2.912E-02 |
| scaffold_176 | 163082 | 163532 | 136 | 4.139E-01 | 5.507E-01 | 1.368E-01  | 1.832E-02 |
| scaffold_176 | 179563 | 179763 | 27  | 8.750E-01 | 7.535E-01 | -1.214E-01 | 8.903E-03 |
| scaffold_176 | 182571 | 182676 | 20  | 8.932E-01 | 7.129E-01 | -1.804E-01 | 2.537E-03 |
| scaffold_178 | 5452   | 5923   | 167 | 4.007E-01 | 5.541E-01 | 1.534E-01  | 4.379E-03 |
| scaffold_178 | 6706   | 6792   | 19  | 5.238E-01 | 4.003E-01 | -1.236E-01 | 4.405E-02 |
| scaffold_178 | 12941  | 13372  | 55  | 9.369E-01 | 8.241E-01 | -1.127E-01 | 1.020E-03 |
| scaffold_178 | 16509  | 16965  | 149 | 4.333E-01 | 6.026E-01 | 1.694E-01  | 1.791E-03 |
| scaffold_178 | 24351  | 24779  | 99  | 5.986E-01 | 4.012E-01 | -1.974E-01 | 4.210E-05 |
| scaffold_178 | 26964  | 27078  | 16  | 8.660E-01 | 6.896E-01 | -1.764E-01 | 1.239E-03 |
| scaffold_178 | 51468  | 51721  | 107 | 4.086E-01 | 3.076E-01 | -1.010E-01 | 4.700E-04 |
| scaffold_178 | 55724  | 55869  | 75  | 4.997E-01 | 6.571E-01 | 1.574E-01  | 2.194E-02 |
| scaffold_178 | 56024  | 56508  | 188 | 4.056E-01 | 6.032E-01 | 1.976E-01  | 3.136E-03 |
| scaffold_178 | 57827  | 58109  | 42  | 7.817E-01 | 6.101E-01 | -1.716E-01 | 2.710E-03 |
| scaffold_178 | 71422  | 71556  | 24  | 7.458E-01 | 5.960E-01 | -1.498E-01 | 3.220E-02 |
| scaffold_178 | 90488  | 90927  | 82  | 5.457E-01 | 4.257E-01 | -1.201E-01 | 1.527E-02 |
| scaffold_178 | 98751  | 99004  | 80  | 5.284E-01 | 6.306E-01 | 1.022E-01  | 1.014E-02 |
| scaffold_178 | 100224 | 100530 | 95  | 7.909E-01 | 6.412E-01 | -1.497E-01 | 1.277E-02 |
| scaffold_178 | 111265 | 111685 | 94  | 6.817E-01 | 5.475E-01 | -1.341E-01 | 1.038E-02 |
| scaffold_178 | 113235 | 113489 | 62  | 4.690E-01 | 6.227E-01 | 1.537E-01  | 1.193E-03 |
| scaffold_178 | 113897 | 114252 | 96  | 5.746E-01 | 7.597E-01 | 1.850E-01  | 1.522E-02 |
| scaffold_178 | 123370 | 123458 | 15  | 9.199E-01 | 7.711E-01 | -1.488E-01 | 1.667E-03 |
| scaffold_178 | 123897 | 124044 | 27  | 6.109E-01 | 7.264E-01 | 1.154E-01  | 1.563E-02 |
| scaffold_178 | 125279 | 125593 | 62  | 5.762E-01 | 4.737E-01 | -1.025E-01 | 1.504E-03 |
| scaffold_178 | 128391 | 128858 | 154 | 5.989E-01 | 3.465E-01 | -2.524E-01 | 1.604E-03 |
| scaffold_178 | 137674 | 137812 | 32  | 7.126E-01 | 8.314E-01 | 1.188E-01  | 2.596E-02 |
| scaffold_178 | 151824 | 152165 | 68  | 7.564E-01 | 6.421E-01 | -1.142E-01 | 2.454E-04 |
| scaffold_178 | 157414 | 157548 | 60  | 3.599E-01 | 5.120E-01 | 1.521E-01  | 2.575E-02 |

|              |        |        |     |           |           |            |           |
|--------------|--------|--------|-----|-----------|-----------|------------|-----------|
| scaffold_178 | 158179 | 158567 | 33  | 8.490E-01 | 7.019E-01 | -1.471E-01 | 3.120E-05 |
| scaffold_178 | 166436 | 166623 | 21  | 7.270E-01 | 6.253E-01 | -1.017E-01 | 2.149E-02 |
| scaffold_178 | 173197 | 173371 | 19  | 8.729E-01 | 6.615E-01 | -2.113E-01 | 1.438E-03 |
| scaffold_178 | 175151 | 175443 | 32  | 9.461E-01 | 8.180E-01 | -1.280E-01 | 3.472E-02 |
| scaffold_178 | 176120 | 176548 | 91  | 6.104E-01 | 8.068E-01 | 1.964E-01  | 1.417E-02 |
| scaffold_188 | 1140   | 1469   | 107 | 3.243E-01 | 4.454E-01 | 1.211E-01  | 5.329E-04 |
| scaffold_189 | 222    | 319    | 18  | 2.353E-01 | 4.452E-01 | 2.098E-01  | 2.875E-04 |
| scaffold_192 | 3025   | 3274   | 39  | 4.409E-01 | 2.905E-01 | -1.504E-01 | 2.608E-02 |
| scaffold_193 | 5299   | 5764   | 61  | 5.383E-01 | 4.293E-01 | -1.090E-01 | 2.768E-02 |
| scaffold_193 | 81751  | 82184  | 83  | 3.678E-01 | 2.453E-01 | -1.225E-01 | 9.000E-07 |
| scaffold_195 | 25658  | 25782  | 54  | 4.442E-01 | 3.133E-01 | -1.309E-01 | 4.121E-02 |
| scaffold_195 | 26671  | 26792  | 44  | 4.451E-01 | 3.139E-01 | -1.312E-01 | 6.170E-04 |
| scaffold_195 | 34649  | 35024  | 78  | 5.830E-01 | 6.868E-01 | 1.038E-01  | 4.034E-02 |
| scaffold_195 | 59600  | 59783  | 34  | 6.771E-01 | 8.164E-01 | 1.393E-01  | 3.424E-02 |
| scaffold_195 | 65884  | 66324  | 207 | 6.835E-01 | 5.153E-01 | -1.682E-01 | 4.038E-03 |
| scaffold_195 | 75005  | 75451  | 134 | 7.179E-01 | 5.872E-01 | -1.306E-01 | 1.828E-02 |
| scaffold_195 | 81589  | 81946  | 74  | 5.725E-01 | 4.440E-01 | -1.284E-01 | 5.519E-03 |
| scaffold_195 | 84724  | 84873  | 57  | 4.602E-01 | 3.117E-01 | -1.486E-01 | 8.230E-05 |
| scaffold_195 | 88435  | 88809  | 121 | 4.253E-01 | 5.681E-01 | 1.428E-01  | 3.926E-03 |
| scaffold_195 | 101037 | 101496 | 215 | 4.923E-01 | 6.638E-01 | 1.715E-01  | 2.975E-03 |
| scaffold_195 | 101501 | 101960 | 218 | 4.772E-01 | 5.929E-01 | 1.158E-01  | 1.375E-02 |
| scaffold_195 | 107043 | 107486 | 84  | 7.473E-01 | 5.511E-01 | -1.962E-01 | 1.421E-02 |
| scaffold_195 | 107587 | 107944 | 88  | 6.829E-01 | 5.323E-01 | -1.506E-01 | 3.031E-03 |
| scaffold_195 | 118157 | 118613 | 112 | 3.666E-01 | 4.742E-01 | 1.076E-01  | 1.594E-02 |
| scaffold_196 | 28288  | 28713  | 72  | 6.453E-01 | 7.533E-01 | 1.081E-01  | 1.901E-03 |
| scaffold_196 | 28715  | 29134  | 162 | 6.001E-01 | 7.304E-01 | 1.303E-01  | 1.640E-05 |
| scaffold_196 | 44074  | 44559  | 122 | 4.846E-01 | 3.528E-01 | -1.318E-01 | 2.136E-03 |
| scaffold_196 | 47110  | 47462  | 49  | 7.194E-01 | 8.298E-01 | 1.103E-01  | 1.590E-05 |
| scaffold_196 | 52279  | 52765  | 107 | 5.890E-01 | 6.995E-01 | 1.105E-01  | 1.752E-02 |
| scaffold_196 | 79522  | 79900  | 128 | 4.297E-01 | 6.281E-01 | 1.984E-01  | 3.090E-04 |
| scaffold_196 | 89351  | 89504  | 22  | 5.887E-01 | 8.165E-01 | 2.278E-01  | 1.338E-04 |
| scaffold_196 | 103077 | 103311 | 105 | 5.027E-01 | 3.810E-01 | -1.218E-01 | 3.028E-02 |
| scaffold_196 | 103777 | 104034 | 74  | 4.286E-01 | 7.151E-01 | 2.865E-01  | 1.853E-03 |
| scaffold_196 | 133404 | 133881 | 156 | 6.274E-01 | 4.624E-01 | -1.650E-01 | 1.070E-02 |
| scaffold_196 | 134374 | 134858 | 146 | 5.589E-01 | 6.604E-01 | 1.015E-01  | 3.618E-02 |
| scaffold_196 | 138724 | 138997 | 68  | 4.571E-01 | 3.348E-01 | -1.223E-01 | 3.502E-02 |
| scaffold_196 | 144836 | 145238 | 159 | 5.329E-01 | 6.459E-01 | 1.130E-01  | 1.346E-03 |
| scaffold_196 | 155224 | 155677 | 131 | 4.889E-01 | 6.153E-01 | 1.264E-01  | 7.341E-03 |
| scaffold_196 | 155685 | 156141 | 161 | 5.141E-01 | 6.446E-01 | 1.305E-01  | 1.195E-02 |
| scaffold_196 | 159242 | 159645 | 129 | 5.356E-01 | 4.079E-01 | -1.278E-01 | 4.530E-05 |
| scaffold_196 | 163336 | 163825 | 123 | 5.579E-01 | 3.769E-01 | -1.809E-01 | 6.100E-04 |
| scaffold_197 | 146692 | 147183 | 114 | 2.391E-01 | 1.170E-01 | -1.221E-01 | 7.580E-05 |
| scaffold_197 | 152651 | 153100 | 100 | 2.963E-01 | 1.800E-01 | -1.164E-01 | 9.764E-03 |
| scaffold_206 | 30660  | 30763  | 28  | 1.023E-03 | 1.308E-01 | 1.298E-01  | 1.421E-02 |
| scaffold_206 | 90768  | 90930  | 22  | 3.830E-02 | 1.775E-01 | 1.392E-01  | 5.910E-05 |
| scaffold_207 | 120967 | 121389 | 102 | 3.583E-01 | 2.388E-01 | -1.195E-01 | 2.140E-05 |
| scaffold_209 | 60669  | 61144  | 186 | 4.617E-01 | 3.410E-01 | -1.208E-01 | 2.086E-03 |

|              |        |        |     |           |           |            |           |
|--------------|--------|--------|-----|-----------|-----------|------------|-----------|
| scaffold_209 | 103039 | 103291 | 83  | 6.549E-01 | 5.134E-01 | -1.415E-01 | 3.674E-02 |
| scaffold_209 | 108485 | 108812 | 76  | 4.355E-01 | 7.198E-01 | 2.843E-01  | 1.200E-06 |
| scaffold_209 | 114276 | 114505 | 110 | 4.193E-01 | 7.007E-01 | 2.814E-01  | 1.340E-05 |
| scaffold_209 | 129863 | 130014 | 70  | 3.527E-01 | 2.089E-01 | -1.438E-01 | 3.941E-04 |
| scaffold_209 | 130329 | 130777 | 78  | 8.993E-01 | 7.653E-01 | -1.340E-01 | 2.568E-03 |
| scaffold_209 | 136412 | 136891 | 85  | 5.090E-01 | 6.472E-01 | 1.382E-01  | 3.129E-02 |
| scaffold_209 | 140270 | 140690 | 66  | 6.172E-01 | 7.246E-01 | 1.074E-01  | 2.607E-02 |
| scaffold_209 | 144499 | 144564 | 31  | 4.708E-01 | 2.869E-01 | -1.839E-01 | 2.167E-03 |
| scaffold_209 | 151612 | 151720 | 55  | 3.915E-01 | 6.044E-01 | 2.129E-01  | 8.830E-05 |
| scaffold_209 | 151858 | 152122 | 52  | 7.902E-01 | 9.337E-01 | 1.435E-01  | 8.265E-03 |
| scaffold_211 | 16319  | 16806  | 164 | 3.523E-01 | 2.137E-01 | -1.386E-01 | 3.202E-03 |
| scaffold_211 | 107801 | 108211 | 45  | 1.045E-01 | 2.172E-01 | 1.127E-01  | 1.700E-06 |
| scaffold_211 | 123778 | 124045 | 47  | 2.220E-01 | 4.464E-02 | -1.774E-01 | 5.000E-07 |
| scaffold_211 | 138441 | 138831 | 43  | 2.871E-01 | 1.214E-01 | -1.657E-01 | 1.559E-04 |
| scaffold_212 | 10771  | 11237  | 195 | 5.052E-01 | 6.070E-01 | 1.018E-01  | 1.287E-02 |
| scaffold_212 | 11252  | 11732  | 171 | 5.093E-01 | 6.136E-01 | 1.043E-01  | 2.819E-02 |
| scaffold_212 | 12219  | 12696  | 151 | 3.813E-01 | 4.992E-01 | 1.179E-01  | 1.332E-02 |
| scaffold_212 | 20875  | 21300  | 54  | 8.607E-01 | 6.918E-01 | -1.689E-01 | 6.000E-07 |
| scaffold_212 | 39134  | 39390  | 55  | 7.613E-01 | 6.570E-01 | -1.043E-01 | 5.718E-03 |
| scaffold_212 | 40638  | 41044  | 96  | 7.780E-01 | 5.884E-01 | -1.895E-01 | 9.306E-04 |
| scaffold_212 | 47986  | 48351  | 175 | 5.868E-01 | 4.693E-01 | -1.175E-01 | 2.286E-02 |
| scaffold_212 | 54361  | 54774  | 162 | 4.047E-01 | 5.083E-01 | 1.036E-01  | 2.323E-02 |
| scaffold_212 | 58814  | 59228  | 90  | 5.380E-01 | 6.854E-01 | 1.474E-01  | 1.018E-03 |
| scaffold_212 | 63379  | 63753  | 100 | 5.502E-01 | 6.826E-01 | 1.324E-01  | 4.946E-02 |
| scaffold_212 | 67098  | 67575  | 141 | 4.540E-01 | 5.990E-01 | 1.449E-01  | 7.376E-03 |
| scaffold_212 | 71403  | 71879  | 111 | 6.128E-01 | 7.228E-01 | 1.100E-01  | 3.789E-03 |
| scaffold_212 | 74138  | 74466  | 92  | 4.463E-01 | 5.809E-01 | 1.345E-01  | 2.755E-03 |
| scaffold_212 | 75877  | 76303  | 106 | 7.152E-01 | 8.365E-01 | 1.213E-01  | 1.160E-02 |
| scaffold_212 | 89436  | 89917  | 183 | 5.831E-01 | 6.987E-01 | 1.156E-01  | 1.620E-02 |
| scaffold_212 | 95088  | 95437  | 32  | 8.271E-01 | 6.762E-01 | -1.508E-01 | 6.090E-04 |
| scaffold_212 | 97239  | 97625  | 101 | 5.820E-01 | 7.383E-01 | 1.563E-01  | 3.304E-03 |
| scaffold_212 | 148910 | 149025 | 17  | 8.726E-01 | 9.894E-01 | 1.168E-01  | 9.890E-05 |
| scaffold_214 | 8083   | 8524   | 108 | 2.218E-01 | 1.218E-01 | -1.000E-01 | 1.284E-02 |
| scaffold_214 | 8526   | 8968   | 260 | 2.816E-01 | 1.504E-01 | -1.312E-01 | 3.049E-02 |
| scaffold_214 | 18232  | 18647  | 159 | 3.577E-01 | 1.732E-01 | -1.845E-01 | 4.698E-03 |
| scaffold_214 | 92531  | 93022  | 145 | 2.797E-01 | 1.497E-01 | -1.299E-01 | 7.640E-04 |
| scaffold_214 | 95146  | 95547  | 63  | 3.071E-01 | 1.941E-01 | -1.130E-01 | 6.752E-04 |
| scaffold_223 | 48958  | 49449  | 130 | 4.658E-02 | 1.595E-01 | 1.130E-01  | 2.007E-03 |
| scaffold_223 | 128764 | 129214 | 140 | 2.421E-01 | 4.348E-01 | 1.927E-01  | 7.400E-06 |
| scaffold_229 | 42907  | 43287  | 42  | 3.355E-01 | 2.348E-01 | -1.007E-01 | 2.241E-03 |
| scaffold_230 | 133386 | 133730 | 50  | 2.964E-01 | 1.519E-01 | -1.445E-01 | 2.517E-03 |
| scaffold_231 | 30373  | 30676  | 35  | 3.944E-03 | 3.752E-01 | 3.713E-01  | 5.420E-05 |
| scaffold_234 | 65567  | 65768  | 64  | 2.984E-01 | 5.497E-02 | -2.434E-01 | 0.000E+00 |
| scaffold_234 | 78070  | 78553  | 111 | 2.988E-01 | 1.368E-01 | -1.620E-01 | 1.839E-02 |
| scaffold_234 | 86333  | 86816  | 133 | 2.830E-01 | 6.978E-02 | -2.132E-01 | 4.860E-05 |
| scaffold_238 | 111046 | 111485 | 72  | 5.052E-01 | 4.024E-01 | -1.027E-01 | 1.175E-03 |
| scaffold_241 | 48532  | 48875  | 36  | 5.719E-01 | 4.553E-01 | -1.166E-01 | 8.721E-03 |

|              |        |        |     |           |           |            |           |
|--------------|--------|--------|-----|-----------|-----------|------------|-----------|
| scaffold_241 | 50313  | 50712  | 48  | 8.979E-02 | 2.121E-01 | 1.223E-01  | 3.600E-06 |
| scaffold_241 | 68092  | 68360  | 51  | 3.087E-01 | 4.665E-01 | 1.578E-01  | 4.830E-05 |
| scaffold_249 | 17394  | 17749  | 104 | 1.221E-01 | 9.751E-03 | -1.123E-01 | 1.338E-02 |
| scaffold_249 | 79784  | 80254  | 186 | 3.597E-01 | 2.312E-01 | -1.285E-01 | 3.488E-02 |
| scaffold_255 | 237    | 649    | 96  | 5.214E-01 | 6.418E-01 | 1.204E-01  | 7.106E-03 |
| scaffold_255 | 2895   | 3368   | 82  | 6.919E-01 | 5.043E-01 | -1.877E-01 | 1.675E-02 |
| scaffold_255 | 6301   | 6745   | 166 | 4.760E-01 | 5.954E-01 | 1.194E-01  | 6.004E-03 |
| scaffold_255 | 10604  | 11085  | 153 | 5.112E-01 | 6.275E-01 | 1.164E-01  | 7.000E-06 |
| scaffold_255 | 11104  | 11583  | 198 | 5.136E-01 | 6.486E-01 | 1.350E-01  | 9.545E-03 |
| scaffold_255 | 14643  | 15124  | 177 | 3.468E-01 | 4.564E-01 | 1.096E-01  | 1.151E-03 |
| scaffold_255 | 26198  | 26672  | 203 | 6.414E-01 | 4.446E-01 | -1.968E-01 | 1.770E-03 |
| scaffold_255 | 41639  | 42008  | 60  | 6.182E-01 | 7.969E-01 | 1.787E-01  | 3.025E-03 |
| scaffold_255 | 47418  | 47916  | 69  | 4.211E-01 | 6.160E-01 | 1.949E-01  | 3.400E-06 |
| scaffold_255 | 50649  | 51141  | 172 | 5.807E-01 | 6.969E-01 | 1.161E-01  | 2.150E-02 |
| scaffold_255 | 52136  | 52628  | 157 | 4.465E-01 | 5.668E-01 | 1.203E-01  | 3.060E-02 |
| scaffold_255 | 54118  | 54608  | 189 | 5.496E-01 | 4.403E-01 | -1.093E-01 | 1.297E-02 |
| scaffold_255 | 71237  | 71703  | 201 | 4.259E-01 | 5.976E-01 | 1.717E-01  | 9.350E-04 |
| scaffold_255 | 81225  | 81682  | 152 | 5.034E-01 | 6.608E-01 | 1.574E-01  | 9.113E-03 |
| scaffold_255 | 81687  | 82098  | 104 | 4.093E-01 | 5.759E-01 | 1.666E-01  | 5.700E-06 |
| scaffold_255 | 83186  | 83467  | 136 | 5.757E-01 | 4.500E-01 | -1.258E-01 | 1.744E-02 |
| scaffold_255 | 85321  | 85775  | 86  | 4.991E-01 | 6.593E-01 | 1.602E-01  | 1.304E-03 |
| scaffold_255 | 89439  | 89916  | 115 | 6.249E-01 | 7.940E-01 | 1.691E-01  | 8.027E-03 |
| scaffold_255 | 95907  | 96383  | 169 | 3.888E-01 | 4.941E-01 | 1.053E-01  | 1.423E-02 |
| scaffold_255 | 98877  | 99365  | 113 | 4.971E-01 | 6.173E-01 | 1.202E-01  | 3.551E-02 |
| scaffold_255 | 102465 | 102907 | 138 | 4.897E-01 | 6.579E-01 | 1.682E-01  | 1.196E-03 |
| scaffold_255 | 103950 | 104305 | 159 | 3.940E-01 | 6.509E-01 | 2.568E-01  | 0.000E+00 |
| scaffold_255 | 108118 | 108605 | 116 | 4.410E-01 | 5.607E-01 | 1.198E-01  | 1.427E-03 |
| scaffold_255 | 111541 | 112017 | 149 | 4.328E-01 | 5.480E-01 | 1.152E-01  | 3.159E-02 |
| scaffold_255 | 112031 | 112515 | 119 | 5.778E-01 | 7.872E-01 | 2.094E-01  | 2.385E-04 |
| scaffold_259 | 19638  | 20025  | 60  | 5.422E-01 | 7.029E-01 | 1.607E-01  | 4.169E-04 |
| scaffold_259 | 29499  | 29856  | 65  | 7.635E-01 | 5.102E-01 | -2.534E-01 | 2.484E-04 |
| scaffold_259 | 69298  | 69712  | 218 | 5.153E-01 | 6.204E-01 | 1.051E-01  | 4.210E-02 |
| scaffold_259 | 100009 | 100423 | 43  | 5.023E-01 | 3.926E-01 | -1.097E-01 | 7.452E-03 |
| scaffold_259 | 109403 | 109807 | 51  | 3.215E-01 | 4.239E-01 | 1.024E-01  | 4.091E-02 |
| scaffold_259 | 114387 | 114489 | 37  | 4.305E-01 | 3.188E-01 | -1.118E-01 | 2.176E-02 |
| scaffold_266 | 33457  | 33561  | 21  | 1.570E-01 | 3.610E-02 | -1.209E-01 | 3.102E-04 |
| scaffold_266 | 34340  | 34656  | 13  | 7.100E-02 | 1.961E-01 | 1.251E-01  | 6.541E-03 |
| scaffold_268 | 96207  | 96641  | 126 | 2.103E-01 | 1.028E-01 | -1.075E-01 | 9.572E-04 |
| scaffold_272 | 20768  | 21259  | 180 | 3.216E-01 | 1.589E-01 | -1.627E-01 | 1.334E-03 |
| scaffold_272 | 75981  | 76479  | 90  | 2.752E-01 | 1.400E-01 | -1.352E-01 | 1.813E-04 |
| scaffold_272 | 76480  | 76959  | 118 | 4.127E-01 | 3.122E-01 | -1.005E-01 | 1.780E-05 |
| scaffold_273 | 5511   | 5981   | 85  | 1.995E-01 | 6.419E-02 | -1.353E-01 | 1.923E-02 |
| scaffold_286 | 45405  | 45750  | 71  | 5.406E-01 | 3.679E-01 | -1.726E-01 | 6.810E-04 |
| scaffold_288 | 53805  | 54244  | 134 | 4.069E-01 | 5.584E-01 | 1.515E-01  | 4.409E-03 |
| scaffold_299 | 26274  | 26709  | 126 | 3.085E-01 | 1.325E-01 | -1.760E-01 | 1.000E-05 |
| scaffold_299 | 47821  | 48302  | 82  | 4.938E-01 | 3.589E-01 | -1.349E-01 | 1.361E-04 |
| scaffold_299 | 83469  | 83961  | 148 | 3.109E-01 | 2.056E-01 | -1.053E-01 | 1.679E-02 |

|              |        |        |     |           |           |            |           |
|--------------|--------|--------|-----|-----------|-----------|------------|-----------|
| scaffold_299 | 83964  | 84456  | 189 | 3.111E-01 | 1.595E-01 | -1.516E-01 | 1.184E-04 |
| scaffold_302 | 22699  | 23043  | 53  | 2.847E-01 | 1.324E-01 | -1.523E-01 | 4.410E-05 |
| scaffold_302 | 65538  | 65756  | 48  | 3.176E-01 | 1.861E-01 | -1.315E-01 | 2.166E-04 |
| scaffold_306 | 63472  | 63936  | 121 | 3.629E-01 | 2.625E-01 | -1.004E-01 | 4.595E-03 |
| scaffold_306 | 96480  | 96956  | 78  | 4.154E-01 | 2.561E-01 | -1.593E-01 | 2.000E-07 |
| scaffold_308 | 15267  | 15395  | 21  | 3.487E-01 | 2.124E-01 | -1.363E-01 | 4.301E-02 |
| scaffold_313 | 33813  | 34288  | 103 | 2.895E-01 | 1.437E-01 | -1.458E-01 | 9.098E-03 |
| scaffold_313 | 44804  | 45269  | 99  | 2.673E-01 | 1.415E-01 | -1.258E-01 | 2.221E-02 |
| scaffold_313 | 70935  | 71121  | 42  | 2.449E-01 | 1.382E-01 | -1.067E-01 | 4.826E-03 |
| scaffold_316 | 42014  | 42325  | 85  | 2.621E-01 | 3.872E-01 | 1.252E-01  | 2.182E-03 |
| scaffold_317 | 53297  | 53578  | 52  | 3.932E-01 | 1.799E-01 | -2.134E-01 | 1.782E-03 |
| scaffold_317 | 70353  | 70769  | 75  | 1.619E-01 | 2.725E-01 | 1.106E-01  | 2.100E-06 |
| scaffold_318 | 12565  | 12991  | 78  | 7.551E-01 | 6.282E-01 | -1.269E-01 | 5.387E-03 |
| scaffold_318 | 17075  | 17387  | 99  | 4.673E-01 | 6.739E-01 | 2.066E-01  | 1.300E-06 |
| scaffold_318 | 25701  | 26128  | 108 | 8.319E-01 | 6.283E-01 | -2.036E-01 | 3.110E-05 |
| scaffold_318 | 52889  | 53231  | 65  | 6.523E-01 | 7.604E-01 | 1.081E-01  | 2.275E-02 |
| scaffold_318 | 60357  | 60488  | 29  | 8.589E-01 | 9.913E-01 | 1.324E-01  | 2.400E-06 |
| scaffold_318 | 63439  | 63753  | 111 | 5.914E-01 | 4.657E-01 | -1.257E-01 | 1.004E-02 |
| scaffold_318 | 63761  | 64069  | 48  | 8.674E-01 | 6.365E-01 | -2.309E-01 | 3.479E-02 |
| scaffold_318 | 64973  | 65347  | 129 | 6.325E-01 | 4.029E-01 | -2.296E-01 | 6.550E-05 |
| scaffold_318 | 67935  | 68247  | 72  | 6.819E-01 | 5.272E-01 | -1.546E-01 | 1.562E-03 |
| scaffold_318 | 72305  | 72378  | 13  | 9.251E-01 | 7.890E-01 | -1.361E-01 | 1.794E-02 |
| scaffold_318 | 83057  | 83506  | 81  | 6.688E-01 | 8.038E-01 | 1.350E-01  | 3.361E-03 |
| scaffold_318 | 83635  | 83856  | 34  | 6.352E-01 | 7.559E-01 | 1.207E-01  | 8.180E-03 |
| scaffold_318 | 89487  | 89848  | 91  | 5.705E-01 | 8.215E-01 | 2.510E-01  | 1.000E-07 |
| scaffold_318 | 91977  | 92100  | 38  | 4.806E-01 | 5.938E-01 | 1.133E-01  | 4.151E-02 |
| scaffold_32  | 12690  | 13089  | 114 | 2.737E-01 | 3.805E-01 | 1.068E-01  | 3.740E-02 |
| scaffold_32  | 112487 | 112836 | 54  | 2.521E-01 | 1.267E-01 | -1.254E-01 | 0.000E+00 |
| scaffold_32  | 112962 | 113126 | 47  | 2.827E-01 | 8.687E-02 | -1.958E-01 | 4.754E-03 |
| scaffold_32  | 276601 | 277096 | 214 | 4.296E-01 | 3.206E-01 | -1.090E-01 | 1.767E-03 |
| scaffold_32  | 456432 | 456929 | 227 | 3.555E-01 | 2.501E-01 | -1.054E-01 | 8.130E-05 |
| scaffold_32  | 493516 | 493874 | 37  | 4.648E-01 | 3.523E-01 | -1.124E-01 | 4.544E-03 |
| scaffold_32  | 599688 | 600177 | 117 | 4.744E-01 | 3.676E-01 | -1.069E-01 | 1.536E-02 |
| scaffold_32  | 788304 | 788597 | 56  | 7.090E-01 | 5.581E-01 | -1.510E-01 | 1.385E-03 |
| scaffold_32  | 792213 | 792575 | 49  | 3.375E-01 | 4.611E-01 | 1.236E-01  | 4.705E-02 |
| scaffold_32  | 807996 | 808329 | 34  | 7.408E-01 | 9.246E-01 | 1.838E-01  | 2.026E-03 |
| scaffold_32  | 809155 | 809540 | 93  | 5.073E-01 | 6.556E-01 | 1.482E-01  | 1.138E-02 |
| scaffold_32  | 817645 | 817716 | 26  | 8.782E-01 | 1.564E-01 | -7.218E-01 | 0.000E+00 |
| scaffold_32  | 824310 | 824603 | 26  | 5.836E-01 | 7.906E-01 | 2.070E-01  | 1.034E-04 |
| scaffold_320 | 73597  | 74023  | 107 | 3.702E-01 | 2.631E-01 | -1.070E-01 | 3.488E-02 |
| scaffold_324 | 86752  | 86997  | 46  | 1.847E-01 | 1.095E-02 | -1.738E-01 | 3.890E-05 |
| scaffold_328 | 37187  | 37615  | 176 | 4.266E-01 | 2.820E-01 | -1.447E-01 | 5.420E-05 |
| scaffold_328 | 47434  | 47741  | 41  | 1.888E-01 | 8.797E-02 | -1.008E-01 | 4.170E-04 |
| scaffold_328 | 57060  | 57209  | 19  | 1.940E-01 | 3.750E-04 | -1.936E-01 | 2.000E-07 |
| scaffold_330 | 16976  | 17469  | 111 | 5.763E-01 | 7.717E-01 | 1.955E-01  | 1.564E-04 |
| scaffold_330 | 25418  | 25826  | 71  | 1.739E-01 | 3.001E-01 | 1.262E-01  | 1.610E-05 |
| scaffold_330 | 27110  | 27400  | 80  | 8.082E-02 | 1.856E-01 | 1.048E-01  | 1.075E-02 |

|              |        |        |     |           |           |            |           |
|--------------|--------|--------|-----|-----------|-----------|------------|-----------|
| scaffold_333 | 56248  | 56581  | 52  | 3.674E-01 | 2.639E-01 | -1.035E-01 | 8.288E-03 |
| scaffold_333 | 73626  | 73757  | 26  | 2.916E-01 | 1.668E-01 | -1.248E-01 | 3.113E-02 |
| scaffold_336 | 14621  | 14870  | 69  | 2.589E-01 | 1.233E-01 | -1.356E-01 | 4.864E-04 |
| scaffold_336 | 35752  | 36054  | 35  | 7.880E-01 | 6.860E-01 | -1.020E-01 | 2.497E-02 |
| scaffold_336 | 36741  | 36831  | 34  | 4.723E-01 | 2.323E-01 | -2.401E-01 | 7.900E-06 |
| scaffold_336 | 40181  | 40626  | 101 | 5.189E-01 | 6.669E-01 | 1.480E-01  | 6.319E-03 |
| scaffold_336 | 41075  | 41516  | 113 | 4.970E-01 | 7.037E-01 | 2.067E-01  | 9.017E-04 |
| scaffold_336 | 42227  | 42560  | 32  | 6.838E-01 | 8.205E-01 | 1.367E-01  | 1.947E-03 |
| scaffold_336 | 49523  | 49902  | 72  | 7.864E-01 | 5.667E-01 | -2.197E-01 | 2.000E-05 |
| scaffold_336 | 50383  | 50620  | 32  | 7.442E-01 | 8.781E-01 | 1.339E-01  | 7.890E-03 |
| scaffold_336 | 51054  | 51245  | 27  | 4.584E-01 | 6.016E-01 | 1.432E-01  | 3.199E-02 |
| scaffold_336 | 57653  | 58014  | 47  | 6.894E-01 | 8.150E-01 | 1.256E-01  | 7.342E-03 |
| scaffold_336 | 58435  | 58740  | 105 | 3.875E-01 | 5.803E-01 | 1.927E-01  | 1.060E-02 |
| scaffold_336 | 61255  | 61568  | 49  | 4.884E-01 | 6.060E-01 | 1.176E-01  | 1.036E-02 |
| scaffold_345 | 28818  | 29027  | 39  | 4.663E-01 | 3.576E-01 | -1.088E-01 | 1.455E-02 |
| scaffold_347 | 9989   | 10066  | 22  | 1.852E-01 | 3.815E-01 | 1.964E-01  | 2.149E-04 |
| scaffold_350 | 56755  | 57217  | 62  | 1.190E-01 | 4.161E-04 | -1.186E-01 | 1.500E-06 |
| scaffold_363 | 59407  | 59603  | 37  | 3.255E-02 | 1.580E-01 | 1.255E-01  | 2.939E-04 |
| scaffold_363 | 60182  | 60299  | 23  | 7.321E-02 | 4.569E-01 | 3.837E-01  | 0.000E+00 |
| scaffold_367 | 22132  | 22619  | 150 | 5.982E-01 | 7.388E-01 | 1.406E-01  | 6.610E-03 |
| scaffold_367 | 23024  | 23169  | 26  | 8.584E-01 | 9.624E-01 | 1.040E-01  | 3.798E-03 |
| scaffold_367 | 32047  | 32464  | 139 | 5.365E-01 | 6.513E-01 | 1.149E-01  | 4.659E-02 |
| scaffold_368 | 64551  | 65014  | 168 | 6.339E-01 | 4.731E-01 | -1.609E-01 | 1.879E-03 |
| scaffold_368 | 71061  | 71371  | 85  | 5.545E-01 | 3.787E-01 | -1.758E-01 | 1.423E-02 |
| scaffold_371 | 37460  | 37865  | 70  | 2.837E-01 | 1.784E-01 | -1.053E-01 | 3.011E-04 |
| scaffold_371 | 63326  | 63782  | 98  | 5.870E-01 | 4.462E-01 | -1.408E-01 | 4.880E-05 |
| scaffold_374 | 25656  | 26113  | 147 | 5.896E-01 | 4.519E-01 | -1.377E-01 | 0.000E+00 |
| scaffold_382 | 35567  | 35851  | 50  | 3.454E-01 | 2.226E-01 | -1.228E-01 | 1.695E-03 |
| scaffold_386 | 55379  | 55498  | 19  | 1.749E-01 | 2.910E-02 | -1.458E-01 | 4.272E-04 |
| scaffold_39  | 23455  | 23946  | 198 | 3.809E-01 | 2.350E-01 | -1.460E-01 | 3.200E-06 |
| scaffold_39  | 33895  | 34388  | 193 | 1.288E-01 | 2.330E-01 | 1.042E-01  | 4.292E-02 |
| scaffold_39  | 102505 | 102968 | 81  | 1.960E-01 | 4.554E-04 | -1.956E-01 | 0.000E+00 |
| scaffold_39  | 181717 | 182144 | 82  | 1.888E-01 | 5.029E-02 | -1.385E-01 | 4.354E-03 |
| scaffold_39  | 183346 | 183622 | 47  | 3.160E-01 | 1.627E-01 | -1.533E-01 | 3.273E-03 |
| scaffold_39  | 191617 | 192091 | 123 | 3.420E-01 | 9.770E-02 | -2.443E-01 | 2.229E-03 |
| scaffold_39  | 194123 | 194618 | 168 | 4.315E-01 | 3.203E-01 | -1.112E-01 | 9.602E-03 |
| scaffold_39  | 221709 | 221971 | 74  | 3.383E-01 | 1.935E-01 | -1.448E-01 | 1.316E-02 |
| scaffold_39  | 231469 | 231951 | 111 | 3.023E-01 | 1.762E-01 | -1.261E-01 | 1.684E-02 |
| scaffold_39  | 270108 | 270567 | 172 | 1.118E-01 | 9.840E-03 | -1.019E-01 | 1.898E-02 |
| scaffold_39  | 291637 | 292127 | 102 | 2.957E-01 | 1.783E-01 | -1.174E-01 | 7.400E-04 |
| scaffold_39  | 364612 | 365082 | 118 | 1.964E-01 | 3.560E-01 | 1.596E-01  | 7.830E-05 |
| scaffold_39  | 366238 | 366716 | 112 | 2.432E-01 | 1.317E-01 | -1.115E-01 | 6.010E-05 |
| scaffold_39  | 390528 | 390948 | 77  | 2.897E-01 | 1.557E-01 | -1.340E-01 | 1.383E-03 |
| scaffold_39  | 391174 | 391502 | 42  | 1.876E-01 | 3.817E-02 | -1.494E-01 | 1.100E-04 |
| scaffold_39  | 411117 | 411598 | 71  | 6.523E-02 | 1.781E-01 | 1.129E-01  | 1.430E-02 |
| scaffold_39  | 418134 | 418380 | 40  | 2.745E-01 | 1.635E-01 | -1.110E-01 | 1.726E-02 |
| scaffold_39  | 418840 | 419161 | 92  | 3.609E-01 | 2.423E-01 | -1.185E-01 | 3.628E-02 |

|              |        |        |     |           |           |            |           |
|--------------|--------|--------|-----|-----------|-----------|------------|-----------|
| scaffold_39  | 439349 | 439846 | 143 | 1.546E-01 | 5.487E-03 | -1.492E-01 | 4.385E-02 |
| scaffold_39  | 464253 | 464691 | 61  | 1.333E-01 | 2.335E-01 | 1.002E-01  | 1.819E-02 |
| scaffold_39  | 468284 | 468675 | 68  | 6.091E-03 | 1.944E-01 | 1.883E-01  | 1.000E-07 |
| scaffold_39  | 470430 | 470797 | 63  | 1.336E-01 | 2.922E-01 | 1.586E-01  | 2.687E-02 |
| scaffold_39  | 500417 | 500891 | 129 | 2.485E-01 | 1.395E-01 | -1.091E-01 | 4.950E-05 |
| scaffold_39  | 530811 | 531301 | 122 | 2.228E-01 | 7.997E-02 | -1.428E-01 | 3.104E-02 |
| scaffold_39  | 531304 | 531790 | 65  | 3.266E-01 | 1.028E-01 | -2.238E-01 | 1.109E-02 |
| scaffold_39  | 559363 | 559800 | 97  | 1.733E-01 | 7.322E-02 | -1.001E-01 | 4.484E-02 |
| scaffold_39  | 617332 | 617823 | 92  | 3.817E-01 | 2.191E-01 | -1.626E-01 | 1.037E-03 |
| scaffold_39  | 626078 | 626540 | 91  | 1.930E-01 | 9.138E-02 | -1.016E-01 | 7.033E-04 |
| scaffold_39  | 629137 | 629592 | 97  | 1.627E-01 | 6.765E-03 | -1.559E-01 | 0.000E+00 |
| scaffold_39  | 635957 | 636444 | 164 | 2.618E-01 | 1.151E-01 | -1.467E-01 | 1.614E-02 |
| scaffold_39  | 636448 | 636934 | 119 | 3.221E-01 | 2.204E-01 | -1.017E-01 | 1.060E-02 |
| scaffold_39  | 691069 | 691386 | 85  | 2.152E-01 | 7.531E-04 | -2.144E-01 | 0.000E+00 |
| scaffold_390 | 31101  | 31398  | 50  | 4.281E-01 | 2.610E-01 | -1.671E-01 | 2.236E-04 |
| scaffold_390 | 67047  | 67487  | 65  | 2.940E-02 | 1.606E-01 | 1.312E-01  | 3.000E-07 |
| scaffold_393 | 65777  | 66170  | 59  | 4.074E-02 | 1.719E-01 | 1.312E-01  | 1.187E-03 |
| scaffold_394 | 21663  | 21811  | 21  | 4.113E-04 | 1.423E-01 | 1.419E-01  | 4.515E-02 |
| scaffold_394 | 30741  | 30912  | 29  | 9.217E-02 | 3.018E-01 | 2.097E-01  | 3.000E-07 |
| scaffold_397 | 2206   | 2444   | 52  | 7.904E-01 | 6.560E-01 | -1.344E-01 | 4.208E-02 |
| scaffold_397 | 5969   | 6287   | 88  | 4.538E-01 | 5.762E-01 | 1.225E-01  | 2.832E-02 |
| scaffold_397 | 40324  | 40787  | 139 | 4.545E-01 | 3.514E-01 | -1.031E-01 | 5.700E-05 |
| scaffold_407 | 1257   | 1731   | 137 | 3.077E-01 | 1.699E-01 | -1.378E-01 | 1.000E-07 |
| scaffold_407 | 4077   | 4288   | 38  | 4.586E-01 | 3.122E-01 | -1.464E-01 | 5.160E-03 |
| scaffold_408 | 676    | 1111   | 138 | 2.777E-01 | 1.335E-01 | -1.441E-01 | 3.698E-02 |
| scaffold_410 | 19764  | 20143  | 65  | 1.651E-01 | 9.687E-03 | -1.554E-01 | 2.364E-02 |
| scaffold_410 | 39235  | 39303  | 23  | 1.605E-01 | 4.204E-04 | -1.601E-01 | 3.501E-02 |
| scaffold_410 | 66969  | 67172  | 25  | 2.788E-01 | 4.266E-01 | 1.477E-01  | 4.999E-02 |
| scaffold_413 | 59184  | 59651  | 180 | 3.308E-01 | 2.258E-01 | -1.049E-01 | 3.345E-03 |
| scaffold_418 | 4966   | 5379   | 53  | 2.841E-01 | 1.775E-01 | -1.066E-01 | 4.800E-05 |
| scaffold_418 | 41462  | 41769  | 37  | 2.774E-01 | 1.340E-01 | -1.433E-01 | 5.163E-03 |
| scaffold_424 | 10796  | 10894  | 18  | 5.259E-01 | 7.610E-01 | 2.351E-01  | 1.014E-03 |
| scaffold_424 | 18992  | 19473  | 116 | 6.416E-01 | 7.425E-01 | 1.010E-01  | 1.080E-02 |
| scaffold_425 | 43012  | 43128  | 20  | 2.355E-01 | 9.321E-02 | -1.423E-01 | 1.649E-04 |
| scaffold_427 | 14233  | 14349  | 35  | 1.433E-01 | 2.489E-01 | 1.056E-01  | 1.007E-03 |
| scaffold_427 | 16780  | 16860  | 40  | 7.424E-01 | 5.119E-01 | -2.305E-01 | 3.700E-06 |
| scaffold_427 | 39125  | 39424  | 125 | 3.190E-01 | 2.190E-01 | -1.000E-01 | 1.408E-03 |
| scaffold_429 | 9315   | 9566   | 65  | 5.765E-01 | 3.771E-01 | -1.993E-01 | 9.672E-04 |
| scaffold_429 | 15816  | 16151  | 61  | 6.772E-01 | 8.560E-01 | 1.788E-01  | 5.310E-05 |
| scaffold_429 | 16641  | 16879  | 87  | 5.816E-01 | 3.475E-01 | -2.341E-01 | 6.538E-03 |
| scaffold_429 | 17625  | 18076  | 116 | 5.667E-01 | 7.163E-01 | 1.495E-01  | 7.962E-03 |
| scaffold_429 | 30531  | 30817  | 119 | 4.041E-01 | 5.139E-01 | 1.098E-01  | 7.838E-04 |
| scaffold_429 | 37076  | 37273  | 34  | 8.652E-01 | 7.553E-01 | -1.100E-01 | 2.020E-03 |
| scaffold_429 | 46483  | 46655  | 36  | 2.504E-02 | 3.111E-01 | 2.860E-01  | 0.000E+00 |
| scaffold_429 | 57178  | 57282  | 21  | 5.845E-01 | 9.928E-01 | 4.083E-01  | 0.000E+00 |
| scaffold_431 | 56037  | 56528  | 96  | 2.514E-01 | 6.703E-02 | -1.844E-01 | 1.697E-03 |
| scaffold_431 | 57033  | 57529  | 143 | 4.125E-01 | 2.939E-01 | -1.187E-01 | 2.480E-02 |

|              |       |       |     |           |           |            |           |
|--------------|-------|-------|-----|-----------|-----------|------------|-----------|
| scaffold_431 | 60626 | 61090 | 100 | 1.649E-01 | 8.420E-05 | -1.648E-01 | 5.860E-03 |
| scaffold_442 | 8387  | 8807  | 284 | 3.101E-01 | 1.885E-01 | -1.216E-01 | 1.240E-04 |
| scaffold_442 | 10258 | 10656 | 292 | 1.923E-01 | 4.771E-02 | -1.446E-01 | 4.565E-03 |
| scaffold_442 | 36398 | 36486 | 37  | 6.730E-01 | 5.562E-01 | -1.168E-01 | 3.047E-02 |
| scaffold_442 | 39009 | 39260 | 70  | 6.295E-01 | 4.304E-01 | -1.991E-01 | 8.150E-05 |
| scaffold_444 | 8334  | 8513  | 35  | 8.495E-01 | 7.119E-01 | -1.375E-01 | 9.148E-03 |
| scaffold_444 | 9165  | 9638  | 187 | 4.075E-01 | 5.243E-01 | 1.168E-01  | 4.490E-02 |
| scaffold_444 | 9642  | 10116 | 113 | 5.401E-01 | 6.884E-01 | 1.484E-01  | 4.175E-03 |
| scaffold_447 | 48938 | 49324 | 52  | 2.607E-01 | 1.319E-01 | -1.288E-01 | 9.300E-06 |
| scaffold_447 | 52267 | 52610 | 77  | 3.563E-01 | 2.281E-01 | -1.282E-01 | 5.310E-05 |
| scaffold_448 | 9772  | 10203 | 98  | 2.093E-01 | 3.710E-01 | 1.617E-01  | 8.000E-07 |
| scaffold_457 | 17968 | 18124 | 21  | 3.534E-01 | 2.207E-01 | -1.327E-01 | 4.848E-02 |
| scaffold_459 | 953   | 1146  | 34  | 1.681E-01 | 3.268E-01 | 1.587E-01  | 1.361E-03 |
| scaffold_460 | 12493 | 12777 | 36  | 2.488E-01 | 3.734E-02 | -2.115E-01 | 3.000E-07 |
| scaffold_465 | 17284 | 17767 | 98  | 4.324E-01 | 3.018E-01 | -1.307E-01 | 0.000E+00 |
| scaffold_469 | 27076 | 27310 | 34  | 1.479E-01 | 2.710E-01 | 1.231E-01  | 4.133E-04 |
| scaffold_474 | 2114  | 2537  | 147 | 2.647E-01 | 1.287E-01 | -1.359E-01 | 1.800E-06 |
| scaffold_474 | 2572  | 3006  | 92  | 3.896E-01 | 2.493E-01 | -1.403E-01 | 2.000E-07 |
| scaffold_476 | 5787  | 5908  | 15  | 1.249E-01 | 2.644E-01 | 1.396E-01  | 5.137E-04 |
| scaffold_476 | 25666 | 25986 | 32  | 5.819E-02 | 2.084E-01 | 1.502E-01  | 1.900E-06 |
| scaffold_490 | 30453 | 30762 | 42  | 4.020E-01 | 6.695E-01 | 2.675E-01  | 2.000E-07 |
| scaffold_490 | 34375 | 34640 | 37  | 7.247E-01 | 8.731E-01 | 1.484E-01  | 7.597E-04 |
| scaffold_490 | 42055 | 42246 | 76  | 5.178E-01 | 7.309E-01 | 2.130E-01  | 6.776E-04 |
| scaffold_490 | 48612 | 48978 | 122 | 5.637E-01 | 7.155E-01 | 1.518E-01  | 2.604E-04 |
| scaffold_499 | 35372 | 35853 | 71  | 3.101E-01 | 1.933E-01 | -1.168E-01 | 2.675E-04 |
| scaffold_500 | 7747  | 8141  | 52  | 4.007E-01 | 6.661E-01 | 2.654E-01  | 2.402E-03 |
| scaffold_500 | 9767  | 10115 | 64  | 8.418E-01 | 7.075E-01 | -1.343E-01 | 3.000E-07 |
| scaffold_500 | 10650 | 11137 | 180 | 4.188E-01 | 5.475E-01 | 1.287E-01  | 3.700E-02 |
| scaffold_504 | 44128 | 44215 | 26  | 2.668E-01 | 1.298E-02 | -2.538E-01 | 7.420E-05 |
| scaffold_506 | 10252 | 10376 | 30  | 2.755E-01 | 1.701E-01 | -1.054E-01 | 3.350E-02 |
| scaffold_508 | 27588 | 27715 | 24  | 4.665E-04 | 1.207E-01 | 1.202E-01  | 9.190E-05 |
| scaffold_510 | 46496 | 46937 | 135 | 3.189E-01 | 1.820E-01 | -1.369E-01 | 2.051E-02 |
| scaffold_513 | 26642 | 26930 | 67  | 2.744E-01 | 1.739E-01 | -1.005E-01 | 7.295E-04 |
| scaffold_513 | 26942 | 27231 | 49  | 2.712E-01 | 5.270E-02 | -2.185E-01 | 0.000E+00 |
| scaffold_513 | 34588 | 35067 | 159 | 3.364E-01 | 2.241E-01 | -1.123E-01 | 1.280E-02 |
| scaffold_523 | 12949 | 13441 | 173 | 1.353E-01 | 1.937E-02 | -1.160E-01 | 2.000E-07 |
| scaffold_523 | 38953 | 39411 | 118 | 2.238E-01 | 3.690E-01 | 1.452E-01  | 2.264E-03 |
| scaffold_523 | 39879 | 40316 | 101 | 2.596E-01 | 3.728E-01 | 1.132E-01  | 1.252E-02 |
| scaffold_525 | 13679 | 14170 | 66  | 8.486E-01 | 7.131E-01 | -1.355E-01 | 9.252E-04 |
| scaffold_535 | 10380 | 10694 | 80  | 2.893E-01 | 1.626E-01 | -1.267E-01 | 5.738E-04 |
| scaffold_537 | 866   | 1283  | 74  | 5.146E-01 | 4.087E-01 | -1.059E-01 | 1.000E-07 |
| scaffold_537 | 9357  | 9772  | 84  | 3.621E-01 | 2.601E-01 | -1.020E-01 | 1.911E-02 |
| scaffold_540 | 7518  | 7840  | 31  | 8.330E-01 | 6.706E-01 | -1.624E-01 | 8.680E-03 |
| scaffold_540 | 24369 | 24787 | 66  | 9.308E-01 | 7.546E-01 | -1.763E-01 | 2.842E-02 |
| scaffold_542 | 20418 | 20897 | 49  | 6.171E-01 | 4.850E-01 | -1.322E-01 | 1.267E-03 |
| scaffold_552 | 10500 | 10840 | 61  | 1.714E-01 | 5.957E-02 | -1.118E-01 | 4.180E-02 |
| scaffold_552 | 39581 | 39923 | 126 | 1.635E-01 | 8.115E-03 | -1.554E-01 | 1.335E-02 |

|              |        |        |     |           |           |            |           |
|--------------|--------|--------|-----|-----------|-----------|------------|-----------|
| scaffold_552 | 39927  | 40267  | 116 | 1.133E-01 | 4.414E-03 | -1.089E-01 | 2.597E-02 |
| scaffold_559 | 25497  | 25693  | 57  | 3.522E-01 | 2.418E-01 | -1.104E-01 | 1.343E-03 |
| scaffold_561 | 7915   | 8006   | 20  | 7.515E-02 | 1.870E-01 | 1.119E-01  | 3.723E-03 |
| scaffold_561 | 16298  | 16498  | 29  | 3.991E-01 | 2.621E-01 | -1.371E-01 | 5.029E-03 |
| scaffold_564 | 10498  | 10670  | 25  | 1.927E-01 | 8.872E-02 | -1.039E-01 | 1.037E-03 |
| scaffold_571 | 5235   | 5388   | 29  | 3.484E-01 | 2.173E-01 | -1.311E-01 | 5.855E-03 |
| scaffold_573 | 5184   | 5574   | 63  | 5.916E-01 | 4.227E-01 | -1.689E-01 | 1.908E-03 |
| scaffold_573 | 33348  | 33739  | 58  | 4.368E-01 | 2.501E-01 | -1.868E-01 | 0.000E+00 |
| scaffold_576 | 22173  | 22617  | 77  | 4.684E-01 | 3.197E-01 | -1.487E-01 | 6.625E-04 |
| scaffold_588 | 5773   | 6220   | 128 | 1.500E-02 | 1.576E-01 | 1.426E-01  | 0.000E+00 |
| scaffold_589 | 27571  | 27883  | 38  | 1.121E-01 | 2.362E-01 | 1.241E-01  | 1.900E-06 |
| scaffold_591 | 10495  | 10925  | 118 | 4.488E-01 | 3.226E-01 | -1.262E-01 | 7.000E-07 |
| scaffold_596 | 34397  | 34517  | 17  | 2.715E-01 | 4.098E-01 | 1.383E-01  | 2.729E-02 |
| scaffold_607 | 14993  | 15436  | 44  | 2.882E-01 | 1.694E-01 | -1.187E-01 | 1.971E-04 |
| scaffold_607 | 28662  | 28892  | 44  | 3.096E-01 | 1.449E-01 | -1.647E-01 | 3.062E-03 |
| scaffold_611 | 4133   | 4557   | 112 | 3.255E-01 | 2.242E-01 | -1.013E-01 | 1.619E-04 |
| scaffold_611 | 32164  | 32300  | 21  | 1.922E-01 | 3.311E-02 | -1.591E-01 | 1.074E-03 |
| scaffold_612 | 24298  | 24604  | 47  | 2.386E-01 | 1.124E-01 | -1.261E-01 | 1.100E-05 |
| scaffold_615 | 31305  | 31603  | 34  | 9.838E-02 | 2.020E-01 | 1.036E-01  | 7.831E-03 |
| scaffold_622 | 9557   | 9976   | 176 | 1.387E-01 | 3.157E-02 | -1.071E-01 | 3.650E-03 |
| scaffold_622 | 9980   | 10401  | 234 | 2.803E-01 | 1.669E-01 | -1.135E-01 | 1.078E-02 |
| scaffold_622 | 20178  | 20490  | 73  | 4.346E-01 | 2.831E-01 | -1.515E-01 | 1.420E-05 |
| scaffold_622 | 29777  | 29897  | 20  | 2.492E-01 | 8.970E-02 | -1.595E-01 | 1.196E-03 |
| scaffold_626 | 8817   | 9008   | 35  | 1.888E-01 | 3.586E-01 | 1.697E-01  | 8.132E-03 |
| scaffold_628 | 6723   | 7059   | 62  | 5.175E-01 | 4.019E-01 | -1.156E-01 | 1.823E-02 |
| scaffold_63  | 258882 | 259336 | 68  | 3.622E-01 | 2.198E-01 | -1.423E-01 | 9.713E-04 |
| scaffold_633 | 2521   | 2906   | 46  | 4.136E-01 | 2.889E-01 | -1.247E-01 | 0.000E+00 |
| scaffold_633 | 5163   | 5398   | 24  | 5.585E-01 | 2.988E-01 | -2.597E-01 | 5.580E-05 |
| scaffold_633 | 15598  | 16089  | 75  | 2.791E-01 | 1.677E-01 | -1.114E-01 | 0.000E+00 |
| scaffold_638 | 16815  | 17027  | 54  | 6.617E-01 | 5.571E-01 | -1.046E-01 | 4.069E-02 |
| scaffold_638 | 19661  | 19936  | 105 | 6.931E-02 | 1.909E-01 | 1.216E-01  | 3.937E-02 |
| scaffold_639 | 21177  | 21630  | 90  | 8.671E-02 | 1.927E-01 | 1.060E-01  | 3.819E-04 |
| scaffold_642 | 25148  | 25455  | 22  | 3.624E-01 | 2.519E-01 | -1.105E-01 | 1.267E-03 |
| scaffold_645 | 29466  | 29942  | 102 | 2.518E-01 | 1.006E-01 | -1.512E-01 | 7.017E-04 |
| scaffold_647 | 5417   | 5563   | 27  | 1.302E-01 | 3.844E-04 | -1.298E-01 | 0.000E+00 |
| scaffold_651 | 25727  | 26025  | 82  | 3.193E-01 | 4.555E-01 | 1.362E-01  | 5.778E-03 |
| scaffold_657 | 11827  | 12176  | 102 | 2.361E-01 | 3.484E-01 | 1.123E-01  | 4.000E-07 |
| scaffold_659 | 25767  | 25872  | 27  | 6.757E-04 | 1.015E-01 | 1.008E-01  | 0.000E+00 |
| scaffold_660 | 19464  | 19606  | 26  | 3.464E-01 | 2.006E-01 | -1.458E-01 | 9.323E-03 |
| scaffold_664 | 1216   | 1555   | 44  | 3.217E-01 | 4.753E-01 | 1.535E-01  | 4.245E-02 |
| scaffold_672 | 14222  | 14404  | 30  | 4.265E-01 | 5.441E-01 | 1.176E-01  | 4.641E-03 |
| scaffold_675 | 9982   | 10107  | 14  | 2.639E-01 | 1.560E-01 | -1.079E-01 | 3.545E-02 |
| scaffold_684 | 11717  | 12028  | 38  | 6.174E-01 | 4.841E-01 | -1.333E-01 | 3.770E-05 |
| scaffold_686 | 6996   | 7112   | 35  | 4.298E-01 | 2.158E-01 | -2.141E-01 | 1.800E-06 |
| scaffold_695 | 21988  | 22105  | 22  | 2.672E-01 | 1.456E-01 | -1.216E-01 | 5.247E-03 |
| scaffold_706 | 21777  | 22229  | 78  | 1.315E-01 | 2.320E-01 | 1.005E-01  | 1.273E-03 |
| scaffold_714 | 21201  | 21430  | 50  | 1.301E-01 | 3.002E-01 | 1.701E-01  | 4.683E-03 |

|              |        |        |     |           |           |            |           |
|--------------|--------|--------|-----|-----------|-----------|------------|-----------|
| scaffold_721 | 10675  | 11094  | 65  | 2.024E-01 | 4.338E-02 | -1.590E-01 | 1.500E-06 |
| scaffold_725 | 16723  | 16982  | 40  | 3.957E-01 | 2.295E-01 | -1.662E-01 | 7.443E-04 |
| scaffold_739 | 13911  | 14393  | 126 | 5.375E-01 | 3.978E-01 | -1.397E-01 | 2.266E-03 |
| scaffold_739 | 15868  | 16354  | 224 | 5.191E-01 | 6.361E-01 | 1.171E-01  | 3.620E-02 |
| scaffold_739 | 17832  | 18309  | 172 | 5.269E-01 | 6.524E-01 | 1.256E-01  | 1.592E-02 |
| scaffold_739 | 19781  | 20266  | 137 | 5.586E-01 | 4.261E-01 | -1.325E-01 | 3.264E-04 |
| scaffold_750 | 8176   | 8363   | 59  | 1.480E-01 | 1.360E-02 | -1.344E-01 | 2.780E-05 |
| scaffold_751 | 5996   | 6297   | 43  | 8.544E-02 | 2.342E-01 | 1.488E-01  | 1.387E-02 |
| scaffold_757 | 2203   | 2485   | 33  | 2.908E-01 | 1.823E-01 | -1.084E-01 | 6.354E-03 |
| scaffold_772 | 7596   | 7997   | 122 | 1.522E-01 | 4.196E-02 | -1.102E-01 | 1.127E-02 |
| scaffold_772 | 8320   | 8417   | 16  | 1.528E-03 | 3.729E-01 | 3.714E-01  | 0.000E+00 |
| scaffold_777 | 12964  | 13384  | 62  | 1.442E-01 | 2.201E-02 | -1.222E-01 | 1.630E-02 |
| scaffold_844 | 160143 | 160638 | 156 | 2.280E-01 | 1.240E-01 | -1.040E-01 | 4.840E-04 |
| scaffold_844 | 233560 | 234053 | 178 | 4.449E-01 | 3.112E-01 | -1.337E-01 | 2.987E-03 |
| scaffold_844 | 259379 | 259870 | 172 | 1.532E-01 | 2.667E-01 | 1.135E-01  | 1.632E-02 |
| scaffold_99  | 3696   | 4183   | 121 | 2.607E-01 | 1.410E-01 | -1.197E-01 | 3.289E-03 |
| scaffold_99  | 23720  | 24181  | 125 | 3.782E-01 | 1.864E-01 | -1.919E-01 | 1.216E-04 |
| scaffold_99  | 32543  | 33015  | 115 | 3.055E-01 | 6.687E-02 | -2.386E-01 | 0.000E+00 |
| scaffold_99  | 36372  | 36827  | 99  | 2.926E-01 | 7.232E-02 | -2.203E-01 | 5.000E-07 |
| scaffold_99  | 57955  | 58450  | 91  | 1.010E-01 | 2.426E-01 | 1.416E-01  | 1.143E-03 |
| scaffold_99  | 58463  | 58948  | 146 | 1.783E-01 | 2.929E-01 | 1.146E-01  | 3.618E-02 |
| scaffold_99  | 77864  | 77947  | 24  | 4.009E-01 | 2.644E-01 | -1.365E-01 | 1.555E-02 |
| scaffold_99  | 82604  | 83042  | 116 | 1.834E-01 | 2.682E-02 | -1.566E-01 | 0.000E+00 |
| scaffold_99  | 83746  | 84092  | 46  | 3.500E-01 | 8.822E-02 | -2.618E-01 | 1.000E-07 |
| scaffold_99  | 87009  | 87318  | 51  | 2.769E-01 | 1.079E-01 | -1.690E-01 | 3.412E-03 |
| scaffold_99  | 112571 | 113059 | 83  | 2.029E-01 | 6.531E-02 | -1.376E-01 | 4.459E-04 |
| scaffold_99  | 113557 | 114049 | 108 | 1.857E-01 | 5.478E-02 | -1.310E-01 | 2.300E-06 |
| scaffold_99  | 114966 | 115332 | 49  | 1.688E-01 | 5.901E-02 | -1.098E-01 | 2.854E-03 |
| scaffold_99  | 116095 | 116568 | 84  | 3.371E-03 | 1.082E-01 | 1.049E-01  | 1.380E-05 |
| scaffold_99  | 140723 | 141127 | 85  | 1.148E-01 | 1.005E-03 | -1.138E-01 | 3.769E-02 |
| scaffold_99  | 147326 | 147737 | 65  | 1.081E-01 | 5.830E-04 | -1.075E-01 | 2.690E-05 |
| scaffold_99  | 147748 | 148150 | 80  | 2.671E-01 | 3.510E-04 | -2.667E-01 | 0.000E+00 |
| scaffold_99  | 151241 | 151731 | 137 | 1.702E-01 | 6.191E-02 | -1.083E-01 | 1.043E-02 |
| scaffold_99  | 159324 | 159793 | 93  | 2.849E-01 | 3.530E-04 | -2.846E-01 | 0.000E+00 |
| scaffold_99  | 183906 | 184394 | 71  | 1.168E-02 | 4.510E-01 | 4.394E-01  | 0.000E+00 |
| scaffold_99  | 195068 | 195548 | 52  | 2.541E-01 | 1.333E-01 | -1.207E-01 | 2.875E-03 |
| scaffold_99  | 197826 | 198308 | 151 | 1.745E-01 | 5.702E-02 | -1.175E-01 | 1.283E-04 |
| scaffold_99  | 204104 | 204588 | 148 | 3.767E-01 | 3.115E-02 | -3.456E-01 | 5.900E-05 |
| scaffold_99  | 212990 | 213479 | 82  | 1.738E-01 | 3.986E-02 | -1.340E-01 | 1.300E-05 |
| scaffold_99  | 216448 | 216940 | 87  | 1.697E-01 | 5.789E-02 | -1.119E-01 | 2.100E-06 |
| scaffold_99  | 236071 | 236432 | 52  | 2.931E-01 | 1.622E-01 | -1.308E-01 | 1.278E-02 |
| scaffold_99  | 236448 | 236799 | 59  | 1.719E-01 | 2.316E-02 | -1.488E-01 | 1.000E-07 |
| scaffold_99  | 236810 | 237179 | 48  | 2.686E-01 | 1.039E-03 | -2.676E-01 | 0.000E+00 |
| scaffold_99  | 239861 | 240318 | 70  | 2.186E-01 | 3.656E-01 | 1.469E-01  | 1.071E-02 |
| scaffold_99  | 270211 | 270701 | 85  | 6.223E-02 | 1.963E-01 | 1.341E-01  | 1.167E-03 |
| scaffold_99  | 298841 | 299319 | 127 | 2.728E-01 | 3.931E-01 | 1.203E-01  | 1.150E-02 |

|             |        |        |     |           |           |           |           |
|-------------|--------|--------|-----|-----------|-----------|-----------|-----------|
| scaffold_99 | 307093 | 307535 | 104 | 1.703E-01 | 3.327E-01 | 1.624E-01 | 5.320E-05 |
|-------------|--------|--------|-----|-----------|-----------|-----------|-----------|

---
