# Supplementary material for: Integrative genomics reveals paths to sex dimorphism in Salix purpurea L
Source: PubMed Central journal article supplement (PMC8325687; doi:10.1038/s41438-021-00606-y), 2021-08-01
Supplement: 41438_2021_606_MOESM6_ESM.pdf [file 41438_2021_606_MOESM6_ESM.pdf]

SUPPLEMENTARY TABLE S7

| Chr   | DMR start | DMR end  | CpG sites | Male mean proportion Methylated | Female mean proportion Methylated | Female:Male difference | FDR       | Gene ID           | Gene Start | Gene End | Sense | Gene log2FoldChang e-MF | FDR        | Gene Description                                                                                                        | WGCNA module | SDR eQTL? |
|-------|-----------|----------|-----------|---------------------------------|-----------------------------------|------------------------|-----------|-------------------|------------|----------|-------|-------------------------|------------|-------------------------------------------------------------------------------------------------------------------------|--------------|-----------|
| Chr01 | 547253    | 547747   | 192       | 0.160                           | 0.044                             | -0.116                 | 4.971E-02 | Sapur.001G009300  | 548191     | 551999   | +     | -0.019                  | NA         | Plastid-lipid associated protein PAP / fibrillin family protein                                                         | brown        | NA        |
| Chr01 | 628596    | 629090   | 131       | 0.346                           | 0.183                             | -0.164                 | 1.174E-02 | Sapur.001G009800  | 627695     | 628278   | -     | 0.550                   | 2.326E-02  | Ubiquitin-conjugating enzyme family protein                                                                             | grey         | NA        |
| Chr01 | 2882193   | 2882682  | 163       | 0.307                           | 0.197                             | -0.110                 | 3.610E-03 | Sapur.001G042800  | 2883343    | 2887756  | +     | -1.158                  | 3.000E-39  | bacterial outer membrane-like protein, putative                                                                         | purple       | SDR eQTL  |
| Chr01 | 4170359   | 4170846  | 137       | 0.443                           | 0.278                             | -0.165                 | 1.532E-03 | Sapur.001G061400  | 4171633    | 4173587  | +     | 0.108                   | NA         | GTP binding Elongation factor Tu family protein                                                                         | pink         | NA        |
| Chr01 | 7936275   | 7936697  | 82        | 0.533                           | 0.403                             | -0.130                 | 7.392E-03 | Sapur.001G0109200 | 7937582    | 7946939  | +     | 0.825                   | 4.410E-102 | ENHANCED DISEASE RESISTANCE 2                                                                                           | cyan         | NA        |
| Chr01 | 9557519   | 9558002  | 197       | 0.281                           | 0.166                             | -0.115                 | 2.816E-02 | Sapur.001G124300  | 9557260    | 9557415  | -     | 0.445                   | 1.026E-01  |                                                                                                                         | grey         | NA        |
| Chr01 | 12341360  | 12341857 | 143       | 0.292                           | 0.176                             | -0.117                 | 4.539E-04 | Sapur.001G147900  | 12339560   | 12340417 | -     | 1.267                   | 7.210E-11  | myb domain protein 66                                                                                                   | grey         | NA        |
| Chr01 | 12408809  | 12409282 | 156       | 0.370                           | 0.251                             | -0.119                 | 1.001E-04 | Sapur.001G148700  | 12409493   | 12411326 | +     | 1.488                   | 1.060E-19  | Protein kinase superfamily protein                                                                                      | grey         | NA        |
| Chr01 | 13657779  | 13658272 | 162       | 0.456                           | 0.272                             | -0.184                 | 9.450E-05 | Sapur.001G166800  | 13659119   | 13660912 | +     | 1.576                   | 3.230E-99  | hydroxyproline-rich glycoprotein family protein                                                                         | cyan         | NA        |
| Chr01 | 14539769  | 14540260 | 141       | 0.192                           | 0.053                             | -0.140                 | 3.040E-03 | Sapur.001G179100  | 14541090   | 14543644 | +     | -2.317                  | 4.730E-18  | related to ABI3/VP1 1                                                                                                   | cyan         | NA        |
| Chr01 | 14569693  | 14570186 | 144       | 0.340                           | 0.221                             | -0.118                 | 2.276E-04 | Sapur.001G179500  | 14564947   | 14569606 | -     | 0.410                   | 1.690E-27  | zinc finger (C2H2 type) family protein                                                                                  | cyan         | NA        |
| Chr02 | 107586    | 108071   | 137       | 0.359                           | 0.246                             | -0.113                 | 7.894E-03 | Sapur.002G001200  | 105957     | 106846   | -     | 1.118                   | 1.580E-14  | mRNA, 952 bp sequence factor, putative                                                                                  | cyan         | SDR eQTL  |
| Chr02 | 5030553   | 5031043  | 95        | 0.166                           | 0.421                             | 0.254                  | 8.541E-03 | Sapur.002G066800  | 5031516    | 5033478  | +     | 0.453                   | 2.440E-23  | hypothetical protein                                                                                                    | purple       | NA        |
| Chr02 | 5075260   | 5075758  | 113       | 0.522                           | 0.398                             | -0.124                 | 7.370E-05 | Sapur.002G067200  | 5057562    | 5075101  | -     | -0.421                  | 2.900E-01  | ARM repeat superfamily protein                                                                                          | grey         | NA        |
| Chr02 | 6809825   | 6810310  | 152       | 0.413                           | 0.301                             | -0.112                 | 4.277E-03 | Sapur.002G087400  | 6810503    | 6813082  | +     | 0.367                   | 8.508E-01  | Phosphoglycerate mutase family protein                                                                                  | brown        | SDR eQTL  |
| Chr02 | 8108002   | 8108488  | 141       | 0.338                           | 0.232                             | -0.107                 | 1.060E-05 | Sapur.002G103400  | 8106678    | 8107868  | -     | 0.491                   | 2.160E-05  | BRI1 kinase inhibitor 1                                                                                                 | cyan         | NA        |
| Chr02 | 8783327   | 8783463  | 32        | 0.340                           | 0.162                             | -0.180                 | 2.521E-02 | Sapur.002G112400  | 8780897    | 8783126  | -     | -0.350                  | 3.810E-26  | mago nashi family protein                                                                                               | black        | NA        |
| Chr02 | 13383471  | 13383967 | 207       | 0.398                           | 0.292                             | -0.105                 | 8.947E-03 | Sapur.002G154400  | 13379348   | 13382739 | -     | -0.609                  | 2.470E-25  | WEE1 kinase homolog                                                                                                     | purple       | NA        |
| Chr03 | 337382    | 337817   | 79        | 0.198                           | 0.094                             | -0.104                 | 3.564E-02 | Sapur.003G004700  | 338702     | 341994   | +     | 0.875                   | 2.520E-103 | NIFU-like protein 2                                                                                                     | purple       | NA        |
| Chr03 | 430350    | 430803   | 119       | 0.379                           | 0.240                             | -0.139                 | 3.013E-02 | Sapur.003G005900  | 429064     | 429417   | -     | 0.234                   | 9.389E-01  | hypothetical protein                                                                                                    | grey         | NA        |
| Chr03 | 999294    | 999706   | 65        | 0.286                           | 0.054                             | -0.232                 | 0.000E+00 | Sapur.003G011600  | 1000697    | 1002147  | +     | -1.414                  | 2.280E-64  | light harvesting chlorophyll A-B-binding protein                                                                        | cyan         | NA        |
| Chr03 | 1014842   | 1015338  | 138       | 0.196                           | 0.053                             | -0.143                 | 2.948E-02 | Sapur.003G012000  | 1016295    | 1022521  | +     | -0.304                  | 1.910E-05  | patatin-like phospholipase                                                                                              | grey         | NA        |
| Chr03 | 6363018   | 6363507  | 196       | 0.256                           | 0.137                             | -0.118                 | 1.072E-04 | Sapur.003G061300  | 6364284    | 6365938  | +     | 0.322                   | 2.680E-21  | inositol-tetrakisphosphate 1-kinase                                                                                     | cyan         | NA        |
| Chr03 | 7617502   | 7617994  | 95        | 0.305                           | 0.152                             | -0.153                 | 2.504E-03 | Sapur.003G078100  | 7618537    | 7623202  | +     | -0.057                  | NA         | thylakoid luminal protein                                                                                               | brown        | NA        |
| Chr04 | 6955751   | 6956065  | 50        | 0.265                           | 0.001                             | -0.264                 | 0.000E+00 | Sapur.004G084900  | 6948037    | 6954931  | -     | 0.509                   | 2.280E-13  | HEAT repeat-containing protein                                                                                          | cyan         | NA        |
| Chr04 | 7999448   | 7999831  | 60        | 0.047                           | 0.177                             | 0.130                  | 1.140E-02 | Sapur.004G092100  | 7996513    | 7999739  | -     | 1.083                   | 3.245E-03  |                                                                                                                         | grey         | NA        |
| Chr05 | 1089761   | 1090234  | 130       | 0.400                           | 0.278                             | -0.122                 | 9.539E-03 | Sapur.005G012100  | 1090912    | 1092377  | +     | 0.857                   | 1.280E-09  | S-locus lectin protein kinase family protein                                                                            | grey         | SDR eQTL  |
| Chr05 | 1550215   | 1550707  | 127       | 0.513                           | 0.405                             | -0.108                 | 1.645E-04 | Sapur.005G020400  | 1542320    | 1549905  | -     | 0.840                   | 3.190E-34  | acyl-CoA binding protein 4<br>P-loop containing nucleoside triphosphate hydrolases superfamily protein                  | cyan         | NA        |
| Chr05 | 1781563   | 1782052  | 155       | 0.257                           | 0.156                             | -0.100                 | 0.000E+00 | Sapur.005G023800  | 1778681    | 1780657  | -     | 1.806                   | 9.150E-13  | protein                                                                                                                 | cyan         | NA        |
| Chr05 | 2767181   | 2767657  | 77        | 0.245                           | 0.132                             | -0.113                 | 8.729E-03 | Sapur.005G037700  | 2768649    | 2772949  | +     | 0.163                   | 1.480E-05  | exoribonuclease 4                                                                                                       | black        | NA        |
| Chr05 | 3002225   | 3002692  | 91        | 0.280                           | 0.180                             | -0.100                 | 9.400E-05 | Sapur.005G041500  | 3002739    | 3006994  | +     | -1.043                  | 3.160E-90  | twin arginine-targeting protein translocase                                                                             | cyan         | NA        |
| Chr05 | 5910848   | 5911324  | 151       | 0.531                           | 0.415                             | -0.116                 | 3.509E-03 | Sapur.005G080100  | 5909525    | 5911088  | -     | -6.633                  | 1.380E-166 | Disease resistance-responsive (dirigent-like protein) family protein                                                    | purple       | NA        |
| Chr05 | 12500441  | 12500916 | 129       | 0.212                           | 0.352                             | 0.140                  | 8.227E-03 | Sapur.005G135600  | 12501185   | 12501460 | +     | 0.129                   | NA         |                                                                                                                         | grey         | NA        |
| Chr05 | 15634244  | 15634732 | 176       | 0.358                           | 0.219                             | -0.139                 | 1.000E-07 | Sapur.005G171500  | 15626932   | 15633291 | -     | 1.505                   | 1.540E-34  | dwarf 27                                                                                                                | cyan         | NA        |
| Chr06 | 8159081   | 8159576  | 160       | 0.351                           | 0.248                             | -0.103                 | 4.517E-03 | Sapur.006G106300  | 8159842    | 8160561  | +     | 2.867                   | 2.600E-97  | FASCICLIN-like arabinogalactan-protein 11                                                                               | salmon       | NA        |
| Chr06 | 9488512   | 9489006  | 157       | 0.398                           | 0.287                             | -0.111                 | 0.000E+00 | Sapur.006G119800  | 9487095    | 9487874  | -     | -0.568                  | 1.128E-02  |                                                                                                                         | grey         | NA        |
| Chr06 | 9488012   | 9488504  | 180       | 0.410                           | 0.281                             | -0.129                 | 0.000E+00 | Sapur.006G119900  | 9488739    | 9492127  | +     | 0.051                   | 8.322E-01  |                                                                                                                         | grey         | NA        |
| Chr06 | 11077291  | 11077786 | 106       | 0.588                           | 0.424                             | -0.163                 | 1.700E-06 | Sapur.006G133000  | 11077905   | 11081517 | +     | NA                      | NA         | nudix hydrolase homolog 24                                                                                              | grey         | NA        |
| Chr06 | 18547182  | 18547663 | 212       | 0.357                           | 0.226                             | -0.131                 | 5.955E-04 | Sapur.006G210900  | 18543333   | 18546331 | -     | -0.100                  | 8.771E-01  | clathrin assembly protein, putative                                                                                     | brown        | NA        |
| Chr07 | 5352110   | 5352435  | 80        | 0.382                           | 0.279                             | -0.103                 | 1.862E-03 | Sapur.007G056700  | 5350420    | 5351146  | -     | -1.455                  | 7.790E-14  | basic chitinase                                                                                                         | grey         | NA        |
| Chr07 | 6660271   | 6660766  | 79        | 0.486                           | 0.375                             | -0.111                 | 3.755E-03 | Sapur.007G060400  | 6660973    | 6663094  | +     | -0.293                  | 6.114E-02  | P-loop containing nucleoside triphosphate hydrolases superfamily protein                                                | grey         | NA        |
| Chr07 | 10896398  | 10896888 | 112       | 0.395                           | 0.295                             | -0.101                 | 1.012E-03 | Sapur.007G103600  | 10893931   | 10896233 | -     | 0.846                   | 8.020E-26  | nicotinamidase 1                                                                                                        | purple       | SDR eQTL  |
| Chr07 | 10936405  | 10936830 | 119       | 0.409                           | 0.261                             | -0.148                 | 4.218E-02 | Sapur.007G104200  | 10933622   | 10935450 | -     | 0.790                   | 4.307E-01  | Exostosin family protein                                                                                                | grey         | NA        |
| Chr07 | 11702528  | 11703023 | 136       | 0.244                           | 0.136                             | -0.109                 | 3.266E-04 | Sapur.007G116100  | 11700648   | 11702152 | -     | 0.224                   | 8.676E-01  | F-box and associated interaction domains-containing protein                                                             | grey         | NA        |
| Chr07 | 12208242  | 12208732 | 133       | 0.332                           | 0.184                             | -0.148                 | 5.246E-03 | Sapur.007G123900  | 12203147   | 12207259 | -     | -0.885                  | 3.495E-02  | squamosa promoter binding protein-like 4<br>Pleckstrin homology (PH) and lipid-binding START domains-containing protein | grey         | NA        |
| Chr08 | 1714088   | 1714566  | 173       | 0.320                           | 0.195                             | -0.125                 | 6.427E-03 | Sapur.008G028600  | 1715159    | 1721475  | +     | 4.965                   | 3.380E-258 |                                                                                                                         | cyan         | NA        |
| Chr08 | 1768051   | 1768546  | 136       | 0.337                           | 0.232                             | -0.106                 | 2.300E-05 | Sapur.008G029100  | 1764803    | 1767262  | -     | 0.130                   | 8.985E-03  | Acyl-CoA N-acyltransferases (NAT) superfamily protein                                                                   | grey         | NA        |
| Chr08 | 2364143   | 2364633  | 156       | 0.262                           | 0.159                             | -0.103                 | 3.016E-02 | Sapur.008G037900  | 2362508    | 2363604  | -     | 0.162                   | 8.841E-01  | Disease resistance-responsive (dirigent-like protein) family protein                                                    | grey         | NA        |
| Chr08 | 3490602   | 3491093  | 178       | 0.196                           | 0.092                             | -0.104                 | 1.898E-02 | Sapur.008G054100  | 3491471    | 3496002  | +     | 2.556                   | 4.270E-265 | phospholipase C 2                                                                                                       | cyan         | NA        |
| Chr08 | 4014969   | 4015466  | 179       | 0.225                           | 0.093                             | -0.132                 | 4.740E-03 | Sapur.008G061300  | 4016461    | 4018703  | +     | -0.050                  | 7.478E-01  | Far-red impaired responsive (FAR1) family protein                                                                       | grey         | NA        |
| Chr08 | 4655997   | 4656489  | 144       | 0.467                           | 0.330                             | -0.136                 | 3.735E-04 | Sapur.008G070800  | 4652703    | 4655346  | -     | 0.463                   | 5.330E-12  | fucosyltransferase 1                                                                                                    | cyan         | NA        |
| Chr08 | 4697495   | 4697976  | 113       | 0.420                           | 0.313                             | -0.107                 | 2.605E-04 | Sapur.008G071300  | 4693117    | 4696771  | -     | -0.685                  | 3.824E-01  | EXS (ERD1/XPR1/SVG1) family protein                                                                                     | darkred      | NA        |
| Chr08 | 8385081   | 8385510  | 114       | 0.377                           | 0.271                             | -0.106                 | 2.066E-02 | Sapur.008G117100  | 8386390    | 8388278  | +     | 8.209                   | 5.570E-177 | Major facilitator superfamily protein                                                                                   | cyan         | NA        |
| Chr08 | 8745017   | 8745507  | 164       | 0.268                           | 0.136                             | -0.132                 | 3.900E-06 | Sapur.008G126600  | 8745894    | 8752312  | +     | -0.914                  | 2.100E-84  | Tetratricopeptide repeat (TPR)-like superfamily protein                                                                 | purple       | NA        |
| Chr09 | 1752337   | 1752769  | 120       | 0.174                           | 0.276                             | 0.102                  | 6.772E-04 | Sapur.009G014400  | 1753409    | 1761862  | +     | -0.005                  | 9.729E-01  | villin 4                                                                                                                | grey         | NA        |
| Chr09 | 3182963   | 3183451  | 152       | 0.329                           | 0.206                             | -0.122                 | 1.559E-02 | Sapur.009G029000  | 3184189    | 3187242  | +     | 0.012                   | 9.348E-01  | UDP-glucosyl transferase 76E2                                                                                           | grey         | NA        |
| Chr09 | 3190881   | 3191371  | 146       | 0.351                           | 0.234                             | -0.117                 | 4.260E-05 | Sapur.009G029100  | 3190200    | 3190673  | -     | -0.281                  | 7.498E-04  | HSP20-like chaperones superfamily protein                                                                               | grey         | NA        |
| Chr09 | 9450450   | 9450677  | 22        | 0.158                           | 0.054                             | -0.104                 | 1.601E-02 | Sapur.009G121400  | 9447194    | 9449775  | -     | 4.502                   | 2.800E-88  | wall-associated kinase 2                                                                                                | cyan         | NA        |
| Chr09 | 9471218   | 9471561  | 94        | 0.388                           | 0.259                             | -0.129                 | 8.244E-03 | Sapur.009G121600  | 9456864    | 9470490  | -     | -0.521                  | 7.020E-06  | Structural maintenance of chromosomes (SMC) family protein                                                              | grey         | NA        |
| Chr10 | 404428    | 404916   | 144       | 0.253                           | 0.135                             | -0.118                 | 1.500E-06 | Sapur.010G006900  | 404984     | 405212   | +     | 1.587                   | 5.340E-07  |                                                                                                                         | grey         | NA        |
| Chr10 | 3001935   | 3002422  | 159       | 0.415                           | 0.310                             | -0.105                 | 4.954E-04 | Sapur.010G043200  | 3002897    | 3008735  | +     | 0.129                   | NA         | no pollen germination related 2                                                                                         | brown        | NA        |
| Chr10 | 4247523   | 4247989  | 117       | 0.407                           | 0.306                             | -0.102                 | 1.644E-03 | Sapur.010G058400  | 4248615    | 4258867  | +     | -0.248                  | 2.810E-05  | Homeotic gene regulator                                                                                                 | grey         | NA        |
| Chr10 | 7733277   | 7733767  | 189       | 0.327                           | 0.218                             | -0.109                 | 6.410E-05 | Sapur.010G087000  | 7734620    | 7735154  | +     | 13.015                  | 0.000E+00  | Late embryogenesis abundant protein (LEA) family protein                                                                | cyan         | NA        |
| Chr10 | 8796343   | 8796834  | 173       | 0.429                           | 0.306                             | -0.122                 | 2.547E-04 | Sapur.010G097400  | 8797798    | 8805783  | +     | 0.379                   | 1.420E-22  | Protein kinase superfamily protein                                                                                      | cyan         | NA        |
| Chr10 | 10490845  | 10491332 | 113       | 0.396                           | 0.282                             | -0.115                 | 2.095E-02 | Sapur.010G118900  | 10480855   | 10489857 | -     | -2.063                  | 2.820E-11  | ARM repeat superfamily protein                                                                                          | brown        | SDR eQTL  |
| Chr10 | 11096083  | 11096553 | 63        | 0.446                           | 0.332                             | -0.114                 | 3.810E-02 | Sapur.010G127400  | 11094300   | 11095372 | -     | 0.421                   | 3.327E-01  | Glucose-1-phosphate adenylyltransferase family protein                                                                  | grey         | NA        |

|        |          |          |     |       |       |        |           |                  |          |          |   |        |            |                                                                                                 |        |          |
|--------|----------|----------|-----|-------|-------|--------|-----------|------------------|----------|----------|---|--------|------------|-------------------------------------------------------------------------------------------------|--------|----------|
| Chr13  | 2658529  | 2658908  | 71  | 0.213 | 0.086 | -0.127 | 1.837E-02 | Sapur.013G037900 | 2656056  | 2658511  | - | 0.535  | 1.196E-02  | GDP-D-mannose 3',5'-epimerase                                                                   | grey   | NA       |
| Chr13  | 2658529  | 2658908  | 71  | 0.213 | 0.086 | -0.127 | 1.837E-02 | Sapur.013G038000 | 2659420  | 2662383  | + | 0.329  | 9.608E-02  | GDP-D-mannose 3',5'-epimerase                                                                   | grey   | NA       |
| Chr13  | 2734628  | 2735122  | 122 | 0.354 | 0.235 | -0.119 | 6.000E-07 | Sapur.013G038600 | 2722690  | 2733720  | - | 0.034  | 6.750E-01  | RNA polymerase II transcription mediators                                                       | grey   | NA       |
| Chr13  | 10578889 | 10579094 | 48  | 0.265 | 0.376 | 0.111  | 3.968E-03 | Sapur.013G095300 | 10576824 | 10577933 | - | 0.106  | NA         |                                                                                                 | grey   | NA       |
| Chr13  | 12534082 | 12534562 | 187 | 0.144 | 0.007 | -0.138 | 1.592E-03 | Sapur.013G114600 | 12535387 | 12543153 | + | -0.355 | 1.870E-01  | Sas10U3 ribonucleoprotein (Upp) family protein                                                  | grey   | NA       |
| Chr13  | 12776276 | 12776768 | 197 | 0.260 | 0.132 | -0.128 | 1.009E-02 | Sapur.013G117400 | 12738881 | 12775449 | - | 2.443  | 1.050E-32  | Protein of unknown function (DUF506)                                                            | salmon | NA       |
| Chr13  | 13855378 | 13855870 | 117 | 0.282 | 0.151 | -0.130 | 1.555E-03 | Sapur.013G132300 | 13854231 | 13854808 | - | 1.297  | 7.740E-27  | Wound-responsive family protein                                                                 | purple | NA       |
| Chr14  | 1463352  | 1463719  | 120 | 0.388 | 0.283 | -0.105 | 3.625E-04 | Sapur.014G019600 | 1460788  | 1463136  | - | -0.583 | 3.910E-07  | Protein of unknown function (DUF594)                                                            | grey   | NA       |
| Chr14  | 1920961  | 1921441  | 74  | 0.143 | 0.000 | -0.143 | 5.108E-03 | Sapur.014G025900 | 1917939  | 1920195  | - | -0.459 | 4.780E-25  | Serine protease inhibitor (SERPIN) family protein                                               | cyan   | NA       |
| Chr14  | 3102628  | 3103114  | 149 | 0.254 | 0.145 | -0.109 | 4.708E-02 | Sapur.014G042700 | 3102028  | 3102348  | - | 3.567  | 8.460E-20  |                                                                                                 | grey   | NA       |
| Chr14  | 5954816  | 5955312  | 162 | 0.288 | 0.175 | -0.113 | 2.900E-06 | Sapur.014G081500 | 5947478  | 5953840  | - | 0.031  | 7.188E-01  | CDPK-related kinase 3                                                                           | brown  | NA       |
| Chr14  | 7531593  | 7532088  | 138 | 0.319 | 0.199 | -0.120 | 1.678E-03 | Sapur.014G104400 | 7522046  | 7530852  | - | 2.676  | 8.930E-100 | multidrug resistance-associated protein 4                                                       | cyan   | NA       |
| Chr14  | 7842065  | 7842527  | 136 | 0.285 | 0.184 | -0.102 | 3.041E-04 | Sapur.014G108800 | 7842628  | 7843776  | + | -0.256 | 1.826E-03  | hypothetical protein                                                                            | grey   | NA       |
| Chr14  | 2848244  | 2848718  | 171 | 0.355 | 0.206 | -0.150 | 3.020E-05 | Sapur.15WG030800 | 2848776  | 2851864  | + | -0.618 | 9.242E-04  |                                                                                                 | grey   | NA       |
| Chr15W | 2988507  | 2989003  | 167 | 0.033 | 0.149 | 0.117  | 0.000E+00 | Sapur.15WG032300 | 2989168  | 2993272  | + | -3.075 | 6.130E-27  | B-S glucosidase 44                                                                              | cyan   | NA       |
| Chr15W | 3109305  | 3109804  | 149 | 0.062 | 0.186 | 0.125  | 1.260E-02 | Sapur.15WG033000 | 3107222  | 3109028  | - | 0.982  | 2.530E-09  | glutathione S-transferase tau 4                                                                 | grey   | SDR eQTL |
| Chr15W | 3109305  | 3109804  | 149 | 0.062 | 0.186 | 0.125  | 1.260E-02 | Sapur.15WG033100 | 3110744  | 3113845  | + | 0.056  | NA         | NAD(P)-linked oxidoreductase superfamily protein                                                | brown  | NA       |
| Chr15W | 3463507  | 3463942  | 157 | 0.349 | 0.225 | -0.124 | 8.234E-03 | Sapur.15WG037100 | 3459178  | 3462993  | - | -8.430 | 4.780E-283 | porphyromonas-type peptidyl-arginine deiminase family protein                                   | purple | SDR eQTL |
| Chr15W | 3573351  | 3573776  | 143 | 0.273 | 0.153 | -0.120 | 4.114E-02 | Sapur.15WG038700 | 3571733  | 3573302  | - | -4.355 | 0.000E+00  | PLATZ transcription factor family protein                                                       | purple | NA       |
| Chr15W | 3678478  | 3678952  | 114 | 0.119 | 0.241 | 0.122  | 1.492E-02 | Sapur.15WG040800 | 3679031  | 3684284  | + | 0.638  | 8.500E-18  | zeta-carotene desaturase                                                                        | purple | SDR eQTL |
| Chr15W | 3917912  | 3918357  | 90  | 0.363 | 0.159 | -0.205 | 1.027E-03 | Sapur.15WG042200 | 3916487  | 3917001  | - | -4.849 | 7.600E-163 | Magnesium transporter CoA-like family protein                                                   | purple | SDR eQTL |
| Chr15W | 4162358  | 4162849  | 153 | 0.257 | 0.130 | -0.127 | 1.961E-02 | Sapur.15WG045000 | 4163012  | 4166090  | + | -6.777 | 0.000E+00  | Protein kinase superfamily protein                                                              | purple | NA       |
| Chr15W | 4383717  | 4384195  | 153 | 0.172 | 0.056 | -0.116 | 2.025E-02 | Sapur.15WG046200 | 4384552  | 4385346  | + | 1.582  | 2.200E-06  | P-loop containing nucleoside triphosphate hydrolases superfamily protein                        | cyan   | SDR eQTL |
| Chr15W | 4384200  | 4384682  | 154 | 0.355 | 0.079 | -0.276 | 3.000E-07 | Sapur.15WG046300 | 4385049  | 4388540  | + | -0.371 | 1.076E-03  | P-loop nucleoside triphosphate hydrolases superfamily protein with CH (Calpain Homology) domain | grey   | SDR eQTL |
| Chr15W | 4464049  | 4464526  | 141 | 0.440 | 0.291 | -0.149 | 1.462E-02 | Sapur.15WG046800 | 4459999  | 4463332  | - | -5.814 | 1.110E-143 | WUSCHEL related homeobox 1                                                                      | purple | SDR eQTL |
| Chr15W | 4593598  | 4594086  | 143 | 0.296 | 0.470 | 0.174  | 1.722E-02 | Sapur.15WG048000 | 4586354  | 4592787  | - | -0.696 | 4.668E-01  | Glutathione S-transferase family protein                                                        | grey   | NA       |
| Chr15W | 4593598  | 4594086  | 143 | 0.296 | 0.470 | 0.174  | 1.722E-02 | Sapur.15WG048100 | 4594474  | 4599091  | + | -4.385 | 5.300E-185 | zinc finger (Ran-binding) family protein                                                        | purple | NA       |
| Chr15W | 5552042  | 5552532  | 110 | 0.292 | 0.130 | -0.162 | 3.761E-02 | Sapur.15WG053300 | 5552700  | 5555368  | + | -0.084 | 8.759E-01  | Leucine-rich repeat protein kinase family protein                                               | grey   | SDR eQTL |
| Chr15W | 5657629  | 5657892  | 44  | 0.263 | 0.384 | 0.121  | 6.439E-04 | Sapur.15WG053900 | 5656898  | 5657300  | - | 1.869  | 1.760E-08  |                                                                                                 | cyan   | SDR eQTL |
| Chr15W | 5859885  | 5860360  | 108 | 0.195 | 0.299 | 0.104  | 7.562E-04 | Sapur.15WG055000 | 5861125  | 5862011  | + | 4.051  | 1.150E-100 | Ribosomal protein L19e family protein                                                           | cyan   | NA       |
| Chr15W | 6330476  | 6330954  | 144 | 0.158 | 0.369 | 0.202  | 2.000E-07 | Sapur.15WG058000 | 6331514  | 6336310  | + | -3.403 | 0.000E+00  | aluminum-activated malate transporter 9                                                         | purple | NA       |
| Chr15W | 6847781  | 6848068  | 103 | 0.413 | 0.572 | 0.159  | 5.399E-03 | Sapur.15WG060700 | 6843872  | 6846941  | - | -0.917 | 6.780E-08  | expansin A4                                                                                     | grey   | NA       |
| Chr15W | 7051791  | 7052284  | 137 | 0.201 | 0.057 | -0.144 | 1.287E-03 | Sapur.15WG062500 | 7046908  | 7051032  | - | -1.367 | 2.770E-15  | ubiquitin-conjugating enzyme 2                                                                  | cyan   | NA       |
| Chr15W | 7090499  | 7090991  | 150 | 0.135 | 0.223 | 0.223  | 2.290E-02 | Sapur.15WG062900 | 7091838  | 7092528  | + | -3.462 | 9.840E-135 | targeting protein for XKLP2                                                                     | purple | NA       |
| Chr15W | 7207495  | 7207988  | 143 | 0.066 | 0.190 | 0.124  | 0.000E+00 | Sapur.15WG063700 | 7208039  | 7211446  | + | -3.904 | 5.290E-53  | Vacuolar protein sorting-associated protein 26                                                  | purple | SDR eQTL |
| Chr15W | 7877321  | 7877785  | 199 | 0.324 | 0.156 | -0.168 | 2.648E-02 | Sapur.15WG067500 | 7878213  | 7885202  | + | -0.350 | 1.160E-07  | poly(A) polymerase 1                                                                            | grey   | NA       |
| Chr15W | 7963142  | 7963616  | 139 | 0.147 | 0.252 | 0.105  | 1.000E-07 | Sapur.15WG067900 | 7964388  | 7966791  | + | -5.443 | 3.360E-137 | Pentatricopeptide repeat (PPR) superfamily protein                                              | purple | SDR eQTL |
| Chr15W | 8217897  | 8218380  | 173 | 0.085 | 0.267 | 0.183  | 1.520E-04 | Sapur.15WG069400 | 8218553  | 8219163  | + | -0.221 | 8.366E-01  | hypothetical protein                                                                            | grey   | SDR eQTL |
| Chr15W | 8300615  | 8301083  | 154 | 0.210 | 0.369 | 0.159  | 5.740E-05 | Sapur.15WG069600 | 8301968  | 8305563  | + | -1.386 | 2.750E-87  | asterix protein                                                                                 | cyan   | NA       |
| Chr15W | 8607826  | 8608270  | 50  | 0.135 | 0.029 | -0.105 | 2.252E-02 | Sapur.15WG072500 | 8605739  | 8607445  | + | -0.781 | 8.880E-58  | glycine-rich RNA-binding protein 3                                                              | black  | SDR eQTL |
| Chr15W | 8772506  | 8772988  | 134 | 0.429 | 0.520 | -0.109 | 0.000E+00 | Sapur.15WG073300 | 8770901  | 8771857  | - | 0.814  | 3.297E-02  |                                                                                                 | grey   | NA       |
| Chr15W | 8849100  | 8849593  | 126 | 0.124 | 0.008 | -0.117 | 3.439E-03 | Sapur.15WG074100 | 8847817  | 8848101  | - | -0.507 | 6.701E-01  | P-loop containing nucleoside triphosphate hydrolases superfamily protein                        | grey   | SDR eQTL |
| Chr15W | 8874365  | 8874835  | 117 | 0.093 | 0.231 | 0.138  | 1.755E-04 | Sapur.15WG074400 | 8875049  | 8877043  | + | -7.937 | 2.430E-240 | Argonaute family protein                                                                        | purple | SDR eQTL |
| Chr15W | 8914105  | 8914592  | 166 | 0.109 | 0.221 | 0.111  | 1.234E-04 | Sapur.15WG074600 | 8893246  | 8913533  | - | -0.411 | 5.043E-02  | Protein of unknown function (DUF789)                                                            | grey   | NA       |
| Chr15W | 8977900  | 8978365  | 100 | 0.367 | 0.512 | 0.144  | 1.000E-07 | Sapur.15WG075000 | 8979041  | 8981012  | + | -1.512 | 9.240E-08  |                                                                                                 | grey   | NA       |
| Chr15W | 10465791 | 10466134 | 37  | 0.367 | 0.201 | -0.166 | 1.833E-03 | Sapur.15WG088800 | 10462497 | 10465609 | - | -0.938 | 7.350E-25  | formin 8                                                                                        | cyan   | SDR eQTL |
| Chr15W | 12351429 | 12351683 | 31  | 0.276 | 0.102 | -0.174 | 2.300E-06 | Sapur.15WG108500 | 12352605 | 12358885 | + | 0.206  | 4.440E-17  | 26S proteasome, regulatory subunit Rpn7;Proteasome component (PCI) domain                       | cyan   | NA       |
| Chr15Z | 3587883  | 3588364  | 110 | 0.385 | 0.245 | -0.140 | 3.816E-04 | Sapur.15ZG038600 | 3588672  | 3590149  | + | 3.847  | 2.370E-41  | NAD(P)-linked oxidoreductase superfamily protein                                                | purple | SDR eQTL |
| Chr15Z | 3669799  | 3670224  | 99  | 0.402 | 0.236 | -0.166 | 1.284E-04 | Sapur.15ZG039500 | 3667103  | 3668874  | - | 1.152  | 1.110E-05  | nodulin MN21 /EamA-like transporter family protein                                              | grey   | SDR eQTL |
| Chr15Z | 3724407  | 3724895  | 209 | 0.391 | 0.262 | -0.130 | 2.443E-04 | Sapur.15ZG039700 | 3725724  | 3729473  | + | 0.659  | 2.450E-50  | asterix protein                                                                                 | purple | SDR eQTL |
| Chr15Z | 3919721  | 3920050  | 40  | 0.073 | 0.207 | 0.135  | 2.420E-05 | Sapur.15ZG041500 | 3920111  | 3937140  | + | 0.623  | 1.001E-04  | porphyromonas-type peptidyl-arginine deiminase family protein                                   | grey   | SDR eQTL |
| Chr15Z | 5267226  | 5267612  | 63  | 0.249 | 0.123 | -0.126 | 7.100E-06 | Sapur.15ZG051100 | 5268208  | 5269980  | + | 0.604  | 6.049E-02  | nodulin MN21 /EamA-like transporter family protein                                              | grey   | SDR eQTL |
| Chr16  | 1724329  | 1724781  | 95  | 0.488 | 0.640 | 0.152  | 1.162E-03 | Sapur.016G017200 | 1722381  | 1723722  | - | 2.023  | 3.710E-107 | UDP-glucosyl transferase 85A3                                                                   | cyan   | NA       |
| Chr16  | 2833257  | 2833733  | 120 | 0.445 | 0.316 | -0.129 | 6.808E-03 | Sapur.016G029900 | 2829393  | 2832411  | - | 0.104  | NA         | Cyclin family protein                                                                           | grey   | NA       |
| Chr16  | 7576403  | 7576834  | 66  | 0.326 | 0.226 | -0.101 | 7.691E-04 | Sapur.016G074800 | 7577097  | 7580148  | + | -0.584 | 5.590E-15  | phosphoribosyl pyrophosphate (PRPP) synthase 3                                                  | grey   | SDR eQTL |
| Chr16  | 11859822 | 11860311 | 180 | 0.367 | 0.258 | -0.109 | 7.105E-03 | Sapur.016G101300 | 11860382 | 11860684 | + | -0.140 | 9.449E-01  | Ribosomal protein S5 domain 2-like superfamily protein                                          | grey   | NA       |
| Chr16  | 20784225 | 20784716 | 149 | 0.306 | 0.185 | -0.121 | 5.200E-06 | Sapur.016G198300 | 20785171 | 20788700 | + | 1.499  | 4.720E-36  | B-box type zinc finger protein with CCT domain                                                  | salmon | NA       |
| Chr16  | 20945425 | 20945922 | 122 | 0.371 | 0.269 | -0.102 | 1.055E-02 | Sapur.016G200200 | 20941847 | 20945364 | + | -0.470 | 7.041E-02  | S-locus lectin protein kinase family protein                                                    | grey   | NA       |
| Chr16  | 22087945 | 22088422 | 83  | 0.280 | 0.117 | -0.163 | 1.353E-03 | Sapur.016G213200 | 22086709 | 22087050 | - | 1.356  | 1.770E-19  | high mobility group B3                                                                          | cyan   | NA       |
| Chr16  | 24441698 | 24442196 | 164 | 0.381 | 0.264 | -0.117 | 4.924E-03 | Sapur.016G235600 | 24442877 | 24445990 | + | 8.416  | 3.770E-169 | oligopeptide transporter 5                                                                      | cyan   | NA       |
| Chr16  | 2573     |          |     |       |       |        |           |                  |          |          |   |        |            |                                                                                                 |        |          |

|       |          |          |     |       |       |        |           |                  |          |          |   |        |           |                                                             |        |    |
|-------|----------|----------|-----|-------|-------|--------|-----------|------------------|----------|----------|---|--------|-----------|-------------------------------------------------------------|--------|----|
| Chr19 | 135778   | 136273   | 199 | 0.115 | 0.218 | 0.103  | 3.030E-05 | Sapur.019G001800 | 134197   | 135656   | - | -0.464 | 4.961E-02 | BURP domain-containing protein                              | grey   | NA |
| Chr19 | 768503   | 768999   | 162 | 0.282 | 0.136 | -0.145 | 4.542E-02 | Sapur.019G006000 | 769809   | 785628   | + | -0.447 | 2.731E-02 | MAPK/ERK kinase kinase 1                                    | grey   | NA |
| Chr19 | 2503792  | 2504276  | 126 | 0.297 | 0.125 | -0.172 | 3.803E-02 | Sapur.019G018900 | 2502488  | 2503186  | - | 1.059  | 1.311E-03 |                                                             | grey   | NA |
| Chr19 | 5360988  | 5361487  | 187 | 0.613 | 0.449 | -0.164 | 5.121E-04 | Sapur.019G043000 | 5361630  | 5363560  | + | 0.561  | 8.526E-04 | Nucleotide-diphospho-sugar transferases superfamily protein | grey   | NA |
| Chr19 | 5732866  | 5733356  | 180 | 0.377 | 0.221 | -0.156 | 2.031E-02 | Sapur.019G045800 | 5733759  | 5739930  | + | -0.175 | 9.398E-01 | RNAPolymerase sigma subunit 2                               | brown  | NA |
| Chr19 | 8471481  | 8471978  | 202 | 0.168 | 0.061 | -0.107 | 1.269E-03 | Sapur.019G055900 | 8463779  | 8471140  | - | -0.310 | 1.450E-12 | Tetrapeptide repeat (TPR)-like superfamily protein          | purple | NA |
| Chr19 | 11998798 | 11999290 | 169 | 0.310 | 0.204 | -0.106 | 5.000E-07 | Sapur.019G086600 | 11997728 | 11998258 | - | 0.680  | 4.334E-01 | CLAVATA3/ESR-RELATED 4                                      | grey   | NA |
| Chr19 | 12238380 | 12238870 | 151 | 0.318 | 0.183 | -0.134 | 3.000E-07 | Sapur.019G089600 | 12236328 | 12237441 | - | 1.216  | 1.190E-07 | homolog of carrot EP3-3 chitinase                           | grey   | NA |
| Chr19 | 12512657 | 12513149 | 177 | 0.132 | 0.008 | -0.124 | 3.319E-02 | Sapur.019G094200 | 12513192 | 12519684 | + | 0.275  | 4.210E-01 |                                                             | grey   | NA |
