# Supplementary material for: Integrative genomics reveals paths to sex dimorphism in Salix purpurea L
Source: PubMed Central journal article supplement (PMC8325687; doi:10.1038/s41438-021-00606-y), 2021-08-01
Supplement: 41438_2021_606_MOESM7_ESM.pdf [file 41438_2021_606_MOESM7_ESM.pdf]

## Supplementary Table S8

| GO ID | GO Description                                                                      | Genes Present | FDR      |
|-------|-------------------------------------------------------------------------------------|---------------|----------|
| 6139  | nucleobase, nucleoside, nucleotide and nucleic acid metabolic process               | 472           | 2.71E-05 |
| 6260  | DNA replication                                                                     | 53            | 2.95E-02 |
| 6261  | DNA-dependent DNA replication                                                       | 41            | 4.73E-02 |
| 6334  | nucleosome assembly                                                                 | 13            | 3.55E-02 |
| 6355  | regulation of transcription, DNA-dependent                                          | 377           | 2.95E-02 |
| 6807  | nitrogen compound metabolic process                                                 | 584           | 1.99E-03 |
| 7018  | microtubule-based movement                                                          | 27            | 2.95E-02 |
| 9451  | RNA modification                                                                    | 134           | 3.22E-16 |
| 9698  | phenylpropanoid metabolic process                                                   | 36            | 3.73E-02 |
| 16070 | RNA metabolic process                                                               | 297           | 4.27E-04 |
| 19219 | regulation of nucleobase, nucleoside, nucleotide and nucleic acid metabolic process | 407           | 2.95E-02 |
| 19685 | photosynthesis, dark reaction                                                       | 11            | 2.95E-02 |
| 34641 | cellular nitrogen compound metabolic process                                        | 566           | 1.19E-03 |
| 45449 | regulation of transcription                                                         | 378           | 2.95E-02 |
| 51171 | regulation of nitrogen compound metabolic process                                   | 409           | 2.95E-02 |
| 51252 | regulation of RNA metabolic process                                                 | 388           | 3.55E-02 |
| 90304 | nucleic acid metabolic process                                                      | 409           | 3.84E-06 |

## Supplementary Table S9

| GO ID | GO Description                                 | Genes Present | FDR      |
|-------|------------------------------------------------|---------------|----------|
| 3     | reproduction                                   | 238           | 2.33E-04 |
| 902   | cell morphogenesis                             | 79            | 3.75E-05 |
| 904   | cell morphogenesis involved in differentiation | 42            | 1.11E-03 |
| 3006  | reproductive developmental process             | 205           | 4.73E-03 |
| 5975  | carbohydrate metabolic process                 | 200           | 9.61E-04 |
| 5996  | monosaccharide metabolic process               | 38            | 1.16E-02 |
| 6066  | alcohol metabolic process                      | 60            | 6.82E-03 |
| 6082  | organic acid metabolic process                 | 183           | 3.15E-07 |
| 6090  | pyruvate metabolic process                     | 9             | 1.23E-02 |
| 6091  | generation of precursor metabolites and energy | 75            | 3.15E-07 |
| 6457  | protein folding                                | 52            | 4.16E-02 |
| 6464  | protein modification process                   | 299           | 1.73E-03 |
| 6468  | protein amino acid phosphorylation             | 202           | 2.03E-02 |
| 6470  | protein amino acid dephosphorylation           | 19            | 4.22E-02 |
| 6487  | protein amino acid N-linked glycosylation      | 10            | 4.24E-02 |
| 6629  | lipid metabolic process                        | 178           | 1.95E-08 |
| 6631  | fatty acid metabolic process                   | 62            | 2.17E-05 |
| 6633  | fatty acid biosynthetic process                | 37            | 3.33E-03 |
| 6638  | neutral lipid metabolic process                | 6             | 1.85E-02 |
| 6639  | acylglycerol metabolic process                 | 6             | 1.85E-02 |
| 6641  | triglyceride metabolic process                 | 6             | 1.85E-02 |
| 6694  | steroid biosynthetic process                   | 15            | 4.50E-02 |
| 6720  | isoprenoid metabolic process                   | 39            | 2.60E-02 |
| 6753  | nucleoside phosphate metabolic process         | 44            | 2.26E-02 |
| 6775  | fat-soluble vitamin metabolic process          | 8             | 1.85E-02 |
| 6778  | porphyrin metabolic process                    | 26            | 7.76E-04 |
| 6779  | porphyrin biosynthetic process                 | 21            | 7.76E-04 |
| 6793  | phosphorus metabolic process                   | 249           | 2.33E-04 |
| 6796  | phosphate metabolic process                    | 249           | 2.26E-04 |
| 6810  | transport                                      | 439           | 1.63E-16 |
| 6811  | ion transport                                  | 108           | 1.38E-05 |
| 6812  | cation transport                               | 81            | 1.10E-03 |
| 6820  | anion transport                                | 23            | 4.24E-02 |
| 6886  | intracellular protein transport                | 77            | 3.70E-05 |
| 6888  | ER to Golgi vesicle-mediated transport         | 7             | 4.22E-02 |
| 6897  | endocytosis                                    | 7             | 2.57E-02 |
| 6944  | cellular membrane fusion                       | 13            | 4.41E-02 |
| 6950  | response to stress                             | 456           | 5.24E-06 |
| 6970  | response to osmotic stress                     | 114           | 1.30E-04 |

|      |                                                         |      |          |
|------|---------------------------------------------------------|------|----------|
| 6979 | response to oxidative stress                            | 68   | 2.61E-02 |
| 7275 | multicellular organismal development                    | 423  | 1.82E-07 |
| 7398 | ectoderm development                                    | 38   | 3.72E-02 |
| 7568 | aging                                                   | 30   | 5.96E-03 |
| 8104 | protein localization                                    | 104  | 5.59E-05 |
| 8152 | metabolic process                                       | 1455 | 2.34E-03 |
| 8202 | steroid metabolic process                               | 21   | 4.50E-02 |
| 8300 | isoprenoid catabolic process                            | 7    | 2.57E-02 |
| 8361 | regulation of cell size                                 | 83   | 4.04E-05 |
| 8544 | epidermis development                                   | 38   | 3.72E-02 |
| 8610 | lipid biosynthetic process                              | 102  | 1.38E-05 |
| 9056 | catabolic process                                       | 172  | 1.10E-03 |
| 9117 | nucleotide metabolic process                            | 44   | 2.26E-02 |
| 9144 | purine nucleoside triphosphate metabolic process        | 21   | 4.50E-02 |
| 9145 | purine nucleoside triphosphate biosynthetic process     | 21   | 4.50E-02 |
| 9165 | nucleotide biosynthetic process                         | 31   | 4.55E-02 |
| 9199 | ribonucleoside triphosphate metabolic process           | 21   | 4.50E-02 |
| 9201 | ribonucleoside triphosphate biosynthetic process        | 21   | 4.50E-02 |
| 9205 | purine ribonucleoside triphosphate metabolic process    | 21   | 4.50E-02 |
| 9206 | purine ribonucleoside triphosphate biosynthetic process | 21   | 4.50E-02 |
| 9266 | response to temperature stimulus                        | 99   | 4.39E-03 |
| 9314 | response to radiation                                   | 118  | 3.53E-02 |
| 9409 | response to cold                                        | 68   | 1.62E-02 |
| 9414 | response to water deprivation                           | 58   | 4.20E-03 |
| 9415 | response to water                                       | 58   | 1.13E-02 |
| 9416 | response to light stimulus                              | 115  | 2.95E-02 |
| 9553 | embryo sac development                                  | 29   | 2.10E-02 |
| 9555 | pollen development                                      | 48   | 4.64E-03 |
| 9606 | tropism                                                 | 19   | 1.98E-02 |
| 9607 | response to biotic stimulus                             | 160  | 6.22E-06 |
| 9617 | response to bacterium                                   | 73   | 1.54E-03 |
| 9628 | response to abiotic stimulus                            | 327  | 1.16E-09 |
| 9629 | response to gravity                                     | 19   | 6.73E-03 |
| 9630 | gravitropism                                            | 16   | 2.11E-02 |
| 9651 | response to salt stress                                 | 106  | 2.31E-04 |
| 9653 | anatomical structure morphogenesis                      | 146  | 6.71E-05 |
| 9657 | plastid organization                                    | 35   | 7.65E-03 |
| 9694 | jasmonic acid metabolic process                         | 11   | 2.93E-02 |
| 9743 | response to carbohydrate stimulus                       | 54   | 8.09E-03 |
| 9744 | response to sucrose stimulus                            | 16   | 8.53E-03 |
| 9756 | carbohydrate mediated signaling                         | 13   | 2.60E-02 |
| 9767 | photosynthetic electron transport chain                 | 15   | 3.66E-04 |
| 9773 | photosynthetic electron transport in photosystem I      | 9    | 1.23E-02 |

|       |                                                      |      |          |
|-------|------------------------------------------------------|------|----------|
| 9814  | defense response, incompatible interaction           | 37   | 3.33E-03 |
| 9817  | defense response to fungus, incompatible interaction | 15   | 2.88E-02 |
| 9826  | unidimensional cell growth                           | 63   | 4.73E-05 |
| 9832  | plant-type cell wall biogenesis                      | 23   | 1.18E-02 |
| 9856  | pollination                                          | 50   | 3.14E-04 |
| 9860  | pollen tube growth                                   | 27   | 2.09E-03 |
| 9867  | jasmonic acid mediated signaling pathway             | 16   | 2.60E-02 |
| 9887  | organ morphogenesis                                  | 51   | 3.52E-02 |
| 9888  | tissue development                                   | 69   | 4.98E-02 |
| 9913  | epidermal cell differentiation                       | 38   | 2.90E-02 |
| 9914  | hormone transport                                    | 19   | 3.57E-02 |
| 9926  | auxin polar transport                                | 18   | 4.05E-02 |
| 9932  | cell tip growth                                      | 33   | 1.03E-03 |
| 9966  | regulation of signal transduction                    | 19   | 4.22E-02 |
| 9987  | cellular process                                     | 1637 | 5.10E-08 |
| 10033 | response to organic substance                        | 248  | 8.65E-03 |
| 10035 | response to inorganic substance                      | 128  | 3.75E-05 |
| 10038 | response to metal ion                                | 104  | 1.92E-04 |
| 10149 | senescence                                           | 18   | 7.26E-03 |
| 10150 | leaf senescence                                      | 13   | 2.04E-02 |
| 10182 | sugar mediated signaling pathway                     | 13   | 2.60E-02 |
| 10189 | vitamin E biosynthetic process                       | 5    | 4.63E-02 |
| 10193 | response to ozone                                    | 11   | 2.93E-02 |
| 10236 | plastoquinone biosynthetic process                   | 4    | 2.24E-02 |
| 10260 | organ senescence                                     | 14   | 9.48E-03 |
| 10324 | membrane invagination                                | 7    | 2.57E-02 |
| 10565 | regulation of cellular ketone metabolic process      | 12   | 1.48E-02 |
| 10817 | regulation of hormone levels                         | 39   | 2.10E-02 |
| 15031 | protein transport                                    | 103  | 1.38E-05 |
| 15698 | inorganic anion transport                            | 18   | 4.56E-02 |
| 15849 | organic acid transport                               | 25   | 3.96E-02 |
| 15979 | photosynthesis                                       | 55   | 1.87E-09 |
| 15994 | chlorophyll metabolic process                        | 18   | 3.82E-03 |
| 15995 | chlorophyll biosynthetic process                     | 15   | 6.48E-04 |
| 16042 | lipid catabolic process                              | 25   | 2.00E-03 |
| 16043 | cellular component organization                      | 242  | 9.51E-05 |
| 16044 | cellular membrane organization                       | 32   | 3.14E-04 |
| 16049 | cell growth                                          | 82   | 8.30E-06 |
| 16051 | carbohydrate biosynthetic process                    | 64   | 2.11E-02 |
| 16053 | organic acid biosynthetic process                    | 88   | 2.42E-03 |
| 16054 | organic acid catabolic process                       | 26   | 9.98E-03 |
| 16103 | diterpenoid catabolic process                        | 5    | 2.24E-02 |
| 16115 | terpenoid catabolic process                          | 7    | 2.57E-02 |

|       |                                                  |     |          |
|-------|--------------------------------------------------|-----|----------|
| 16192 | vesicle-mediated transport                       | 76  | 1.67E-08 |
| 16310 | phosphorylation                                  | 229 | 8.58E-04 |
| 18130 | heterocycle biosynthetic process                 | 42  | 1.65E-03 |
| 19318 | hexose metabolic process                         | 29  | 4.53E-02 |
| 19684 | photosynthesis, light reaction                   | 28  | 2.55E-04 |
| 19685 | photosynthesis, dark reaction                    | 5   | 2.24E-02 |
| 19725 | cellular homeostasis                             | 45  | 2.77E-02 |
| 19752 | carboxylic acid metabolic process                | 183 | 2.88E-07 |
| 21700 | developmental maturation                         | 20  | 2.16E-02 |
| 22414 | reproductive process                             | 233 | 2.73E-04 |
| 22900 | electron transport chain                         | 28  | 2.31E-05 |
| 23033 | signaling pathway                                | 150 | 4.60E-02 |
| 23051 | regulation of signaling process                  | 19  | 4.22E-02 |
| 30003 | cellular cation homeostasis                      | 23  | 3.71E-02 |
| 30004 | cellular monovalent inorganic cation homeostasis | 6   | 6.81E-03 |
| 30007 | cellular potassium ion homeostasis               | 5   | 6.02E-03 |
| 30154 | cell differentiation                             | 92  | 9.74E-05 |
| 31407 | oxylipin metabolic process                       | 13  | 2.60E-02 |
| 31408 | oxylipin biosynthetic process                    | 11  | 4.16E-02 |
| 32501 | multicellular organismal process                 | 450 | 1.14E-08 |
| 32502 | developmental process                            | 469 | 1.25E-08 |
| 32535 | regulation of cellular component size            | 83  | 4.64E-05 |
| 32787 | monocarboxylic acid metabolic process            | 105 | 1.14E-08 |
| 32940 | secretion by cell                                | 17  | 4.41E-02 |
| 32989 | cellular component morphogenesis                 | 83  | 9.51E-05 |
| 33013 | tetrapyrrole metabolic process                   | 27  | 5.18E-04 |
| 33014 | tetrapyrrole biosynthetic process                | 24  | 1.08E-04 |
| 33036 | macromolecule localization                       | 139 | 1.69E-03 |
| 33238 | regulation of cellular amine metabolic process   | 5   | 2.24E-02 |
| 34285 | response to disaccharide stimulus                | 16  | 1.17E-02 |
| 34613 | cellular protein localization                    | 77  | 1.57E-04 |
| 35295 | tube development                                 | 33  | 4.76E-03 |
| 35466 | regulation of signaling pathway                  | 31  | 2.18E-02 |
| 40007 | growth                                           | 92  | 8.95E-06 |
| 42180 | cellular ketone metabolic process                | 187 | 1.37E-07 |
| 42221 | response to chemical stimulus                    | 443 | 1.69E-08 |
| 42360 | vitamin E metabolic process                      | 5   | 4.63E-02 |
| 42362 | fat-soluble vitamin biosynthetic process         | 8   | 1.85E-02 |
| 42440 | pigment metabolic process                        | 37  | 1.94E-04 |
| 42592 | homeostatic process                              | 59  | 1.12E-02 |
| 42742 | defense response to bacterium                    | 61  | 1.55E-03 |
| 43412 | macromolecule modification                       | 312 | 4.24E-02 |
| 43436 | oxoacid metabolic process                        | 183 | 2.88E-07 |

|       |                                                 |     |          |
|-------|-------------------------------------------------|-----|----------|
| 43687 | post-translational protein modification         | 260 | 8.87E-03 |
| 44038 | cell wall macromolecule biosynthetic process    | 7   | 4.22E-02 |
| 44242 | cellular lipid catabolic process                | 23  | 2.42E-03 |
| 44248 | cellular catabolic process                      | 129 | 2.29E-02 |
| 44255 | cellular lipid metabolic process                | 134 | 1.95E-08 |
| 44262 | cellular carbohydrate metabolic process         | 112 | 1.23E-02 |
| 44271 | cellular nitrogen compound biosynthetic process | 109 | 4.10E-04 |
| 44281 | small molecule metabolic process                | 344 | 1.87E-09 |
| 44282 | small molecule catabolic process                | 53  | 1.92E-03 |
| 44283 | small molecule biosynthetic process             | 170 | 1.03E-04 |
| 45184 | establishment of protein localization           | 103 | 1.38E-05 |
| 45487 | gibberellin catabolic process                   | 5   | 2.24E-02 |
| 46148 | pigment biosynthetic process                    | 31  | 6.22E-04 |
| 46394 | carboxylic acid biosynthetic process            | 88  | 2.42E-03 |
| 46395 | carboxylic acid catabolic process               | 26  | 9.98E-03 |
| 46483 | heterocycle metabolic process                   | 104 | 5.59E-05 |
| 46486 | glycerolipid metabolic process                  | 19  | 4.22E-02 |
| 46686 | response to cadmium ion                         | 93  | 5.10E-06 |
| 46903 | secretion                                       | 17  | 4.41E-02 |
| 46907 | intracellular transport                         | 109 | 3.44E-07 |
| 46942 | carboxylic acid transport                       | 25  | 3.96E-02 |
| 48193 | Golgi vesicle transport                         | 20  | 2.32E-04 |
| 48229 | gametophyte development                         | 71  | 7.73E-05 |
| 48468 | cell development                                | 60  | 6.33E-04 |
| 48588 | developmental cell growth                       | 36  | 2.18E-04 |
| 48589 | developmental growth                            | 73  | 4.57E-06 |
| 48610 | reproductive cellular process                   | 45  | 9.18E-04 |
| 48856 | anatomical structure development                | 350 | 1.67E-05 |
| 48868 | pollen tube development                         | 33  | 4.76E-03 |
| 48869 | cellular developmental process                  | 130 | 1.59E-05 |
| 48878 | chemical homeostasis                            | 39  | 5.24E-03 |
| 50801 | ion homeostasis                                 | 29  | 3.70E-02 |
| 50896 | response to stimulus                            | 794 | 2.97E-11 |
| 51179 | localization                                    | 449 | 9.62E-16 |
| 51186 | cofactor metabolic process                      | 70  | 3.89E-04 |
| 51188 | cofactor biosynthetic process                   | 50  | 9.74E-05 |
| 51234 | establishment of localization                   | 440 | 2.32E-16 |
| 51641 | cellular localization                           | 134 | 1.09E-07 |
| 51649 | establishment of localization in cell           | 126 | 6.83E-08 |
| 51704 | multi-organism process                          | 207 | 1.69E-08 |
| 51707 | response to other organism                      | 154 | 8.51E-06 |
| 51716 | cellular response to stimulus                   | 187 | 1.34E-03 |
| 55046 | microgametogenesis                              | 10  | 3.03E-02 |

|       |                                                         |     |          |
|-------|---------------------------------------------------------|-----|----------|
| 55075 | potassium ion homeostasis                               | 5   | 6.02E-03 |
| 55080 | cation homeostasis                                      | 26  | 2.91E-02 |
| 55086 | nucleobase, nucleoside and nucleotide metabolic process | 54  | 1.49E-02 |
| 55114 | oxidation reduction                                     | 48  | 5.01E-04 |
| 60560 | developmental growth involved in morphogenesis          | 63  | 4.73E-05 |
| 60918 | auxin transport                                         | 19  | 2.88E-02 |
| 61024 | membrane organization                                   | 32  | 3.14E-04 |
| 61025 | membrane fusion                                         | 13  | 4.41E-02 |
| 65008 | regulation of biological quality                        | 174 | 5.10E-08 |
| 70589 | cellular component macromolecule biosynthetic process   | 7   | 4.22E-02 |
| 70592 | cell wall polysaccharide biosynthetic process           | 7   | 4.22E-02 |
| 70727 | cellular macromolecule localization                     | 82  | 1.21E-04 |
| 70882 | cellular cell wall organization or biogenesis           | 28  | 4.51E-02 |
| 70887 | cellular response to chemical stimulus                  | 103 | 9.81E-04 |
| 71310 | cellular response to organic substance                  | 93  | 1.48E-03 |
| 71322 | cellular response to carbohydrate stimulus              | 13  | 2.60E-02 |
| 71395 | cellular response to jasmonic acid stimulus             | 16  | 2.60E-02 |
| 71495 | cellular response to endogenous stimulus                | 73  | 7.05E-03 |
| 90066 | regulation of anatomical structure size                 | 83  | 4.64E-05 |

---
