# Supplementary material for: Integrative genomics reveals paths to sex dimorphism in Salix purpurea L
Source: PubMed Central journal article supplement (PMC8325687; doi:10.1038/s41438-021-00606-y), 2021-08-01
Supplement: 41438_2021_606_MOESM8_ESM.pdf [file 41438_2021_606_MOESM8_ESM.pdf]

|                    |        |            |                        |                                                                     |                                       |       |                                                                                                                                                                                                         |               |              |         |             |
|--------------------|--------|------------|------------------------|---------------------------------------------------------------------|---------------------------------------|-------|---------------------------------------------------------------------------------------------------------------------------------------------------------------------------------------------------------|---------------|--------------|---------|-------------|
| Sapur.016G274000.1 | -0.404 | 7.670E-07  | PAT1                   | GRAS family transcription factor                                    | Transcription                         | trans | mRNA decapping                                                                                                                                                                                          | TAIR          | 0.048750239  | 0.46%   | 0.494543761 |
| Sapur.017G008600.1 | -0.117 | 2.097E-01  | ATGLK1,GLK1,GPR11      | golden-like transcription factor, putative                          | Transcription                         | trans | regulates chloroplast development                                                                                                                                                                       | TAIR          | -0.408862145 | -6.90%  | 0.398002416 |
| Sapur.017G014200.1 | -1.142 | 3.480E-06  | SGR7,SHR               | GRAS family transcription factor                                    | Transcription                         | trans | quiescent center cell specification                                                                                                                                                                     | UniProt       | 0.158284491  | 79.23%  | 0.18851619  |
| Sapur.017G015700.1 | -0.769 | 7.520E-08  | SGR7,SHR               | GRAS family transcription factor                                    | Transcription                         | trans | quiescent center cell specification                                                                                                                                                                     | UniProt       | -0.085590236 | -9.65%  | 0.421828771 |
| Sapur.017G067900.2 | 0.107  | 8.718E-01  | ATHB13                 | Homeobox-leucine zipper protein family                              | Transcription                         | trans | involved in seed to seedling transition                                                                                                                                                                 | TAIR          | 0.060825254  | 261.60% | 0.076929306 |
| Sapur.017G107600.1 | -1.178 | 4.740E-34  | ATMYB43,MYB43          | myb domain protein 43                                               | Transcription                         | trans | phenylpropanoid biosynthesis                                                                                                                                                                            | TAIR          | 1.145767164  | 37.76%  | 0.182486866 |
| Sapur.018G062500.1 | -1.591 | 9.370E-64  | TW2                    | AP2/ERF domain transcription factor                                 | Transcription                         | trans | stress response                                                                                                                                                                                         | UniProt       | -1.008529935 | -19.21% | 0.314412226 |
| Sapur.019G065400.1 | 1.678  | 5.130E-124 | CYP74A1                | cytochrome P450 family protein                                      | Hormone signaling                     | trans | Inactivation of early gibberellin intermediates                                                                                                                                                         | UniProt       | -15.67688143 | -46.21% | 0.000609148 |
| Sapur.019G074900.8 | -5.779 | 5.390E-126 | AGL11,STK              | agnamous MADS box factor transcription factor                       | Transcription; Floral Development     | trans | Maternal control of endothelium formation and female gametophyte development                                                                                                                            | UniProt       | 0.913434876  | 203.65% | 0.051954672 |
| Sapur.019G112000.1 | 0.993  | 6.270E-85  |                        | BZIP transcription factor                                           | Transcription                         | trans |                                                                                                                                                                                                         | -             | -10.02029276 | -25.77% | 0.011738972 |
| Sapur.15WG012900.1 | -0.355 | 3.420E-44  | ATO                    | splicing factor 3a subunit 3, putative                              | RNA splicing and regulation           | trans | pre-spliceosome formation, necessary for gametic cell fate determination component of RISC, involved in RNA post-transcriptional silencing via 21-22 nt RNAs                                            | UniProt       | -0.362459118 | -0.85%  | 0.479573968 |
| Sapur.15WG022500.3 | 0.018  | NA         | AGO1                   | argonate protein 1B                                                 | RNA splicing and regulation           | cis   | regulates bud growth                                                                                                                                                                                    | UniProt       | 0.015845775  | 146.21% | 0.26040154  |
| Sapur.15WG023500.1 | -0.594 | 8.810E-27  | ATBTF3,BTF3            | basic transcription factor 3                                        | Transcription                         | cis   | seed development                                                                                                                                                                                        | TAIR; UniProt | -1.011411406 | -0.81%  | 0.48800724  |
| Sapur.15WG023800.1 | -1.228 | 1.580E-20  | anak057,NAC057         | NAC transcription factor                                            | Transcription                         | cis   |                                                                                                                                                                                                         | -             | -0.00539782  | -0.68%  | 0.495612738 |
| Sapur.15WG024100.1 | -0.456 | 3.180E-19  | EP1,VE7                | Homeodomain-like superfamily protein                                | Transcription                         | cis   | Modification of cell-wall structure                                                                                                                                                                     | UniProt       | 2.190480682  | 13.38%  | 0.27192435  |
| Sapur.15WG026400.1 | 1.645  | 1.470E-59  | ATMYB52,BWS2,MYB52     | myb domain protein 52                                               | Transcription                         | cis   | Drought tolerance, secondary cell wall biosynthesis                                                                                                                                                     | UniProt       | -0.227529133 | -7.30%  | 0.463064695 |
| Sapur.15WG031800.1 | -5.340 | 1.360E-109 | ATMYB6,MYB6            | MYB-like transcription factor                                       | Transcription                         | cis   |                                                                                                                                                                                                         | -             | -0.032636883 | -4.84%  | 0.487818481 |
| Sapur.15WG032500.1 | -0.646 | 2.420E-48  | ATMYB41,MYB41          | Myb transcription factor, putative                                  | Transcription                         | cis   | regulates accumulation of UV protectant sinapoylmalate                                                                                                                                                  | TAIR; UniProt | -0.947710667 | -17.94% | 0.155123552 |
| Sapur.15WG038800.1 | -6.149 | 4.490E-292 |                        | PLATZ transcription factor family protein                           | Transcription                         | cis   |                                                                                                                                                                                                         | -             | NA           | NA      | NA          |
| Sapur.15WG039100.1 | -6.183 | 8.940E-158 |                        | PLATZ transcription factor family protein                           | Transcription                         | cis   |                                                                                                                                                                                                         | -             | NA           | NA      | NA          |
| Sapur.15WG039400.1 | -5.732 | 8.450E-124 |                        | PLATZ transcription factor family protein                           | Transcription                         | cis   |                                                                                                                                                                                                         | -             | -0.19635684  | -20.72% | 0.57106592  |
| Sapur.15WG039600.1 | -1.732 | 8.980E-29  |                        | PLATZ transcription factor family protein                           | Transcription                         | cis   |                                                                                                                                                                                                         | -             | 0.408051975  | 17.42%  | 0.353073949 |
| Sapur.15WG039700.1 | -5.549 | 1.810E-115 |                        | PLATZ transcription factor family protein                           | Transcription                         | cis   |                                                                                                                                                                                                         | -             | 0.971295514  | 68.66%  | 0.19061934  |
| Sapur.15WG039800.1 | -4.194 | 2.320E-62  |                        | PLATZ transcription factor family protein                           | Transcription                         | cis   |                                                                                                                                                                                                         | -             | 0.294703766  | 20.73%  | 0.378742442 |
| Sapur.15WG042400.1 | -2.176 | 1.860E-138 | ADT2                   | argonate dehydratase 2                                              | Secondary Metabolism                  | cis   | catalyzes argenolate to phenylalanine                                                                                                                                                                   | TAIR          | -0.818118927 | -56.55% | 0.994724545 |
| Sapur.15WG045900.1 | -1.427 | 3.510E-09  | anak058,NAC058         | NAC transcription factor 005                                        | Transcription                         | cis   | nuclear and plasma membrane targeting                                                                                                                                                                   | TAIR          | 0.025452877  | 13.96%  | 0.449794577 |
| Sapur.15WG046800.1 | -5.814 | 1.110E-143 | WDX1                   | WUSCHEL related homeobox 1                                          | Transcription; Floral Development     | cis   | Plant development                                                                                                                                                                                       | UniProt       | 0.995119791  | 55.44%  | 0.106423415 |
| Sapur.15WG056200.1 | -2.058 | 8.710E-12  | ARR2,RR22              | response regulator 22                                               | Hormone signaling                     | cis   | Involved in two-component cytokinin response                                                                                                                                                            | TAIR          | -0.139820947 | -61.12% | 0.763291721 |
| Sapur.15WG056300.1 | -4.640 | 3.620E-83  | WDX1                   | WUSCHEL related homeobox 1                                          | Transcription; Floral Development     | cis   | Plant development                                                                                                                                                                                       | UniProt       | 0.320026593  | 69.74%  | 0.126632321 |
| Sapur.15WG057600.1 | 6.250  | 2.350E-148 | ATTCP18,BRC1,TCP18     | transcription factor TCP24                                          | Transcription                         | cis   | regulates bud growth                                                                                                                                                                                    | TAIR; UniProt | 0.542541753  | 82.82%  | 0.117104887 |
| Sapur.15WG058800.1 | -1.113 | 2.180E-20  |                        | constans-like zinc finger protein                                   | Transcription; Floral Development     | cis   | transcription factor, regulation of flowering, acts on SOC1, FT, TFL, photoreceptor regulated, could be sexually antagonistic gene, upstream of flowering pathway, could be regulating many other genes | TAIR; UniProt | -1.077559494 | -35.75% | 0.87260121  |
| Sapur.15WG060600.1 | -1.119 | 8.240E-09  | IDN2,ADM12             | transcription factor X1-like protein                                | Transcription                         | cis   | RDDM pathway, AGO4 dependant binding of Inc-RNA                                                                                                                                                         | UniProt       | -0.015823678 | -15.07% | 0.602052562 |
| Sapur.15WG062800.1 | -7.630 | 4.500E-231 | GATA15                 | GATA transcription factor 15                                        | Transcription; Floral Development     | cis   | transcription factor, floral and vegetative development                                                                                                                                                 | TAIR          | 1.358814322  | 19.85%  | 0.291359137 |
| Sapur.15WG065500.1 | -0.066 | 7.959E-01  | AtbZIP70,bZIP70        | bZIP transcription factor                                           | Transcription                         | cis   |                                                                                                                                                                                                         | -             | -0.500457344 | -42.25% | 0.77813865  |
| Sapur.15WG073900.1 | -2.847 | 3.750E-23  | ARR17,RR17             | response regulator 17                                               | Hormone signaling                     | cis   | Type-A cytokinin response regulator                                                                                                                                                                     | TAIR          | 0.044790833  | 22.78%  | 0.410801924 |
| Sapur.15WG074000.1 | -4.056 | 3.410E-56  | ARR17,RR17             | response regulator 17                                               | Hormone signaling                     | cis   | Type-A cytokinin response regulator                                                                                                                                                                     | TAIR          | 0.025216631  | 4.13%   | 0.475112304 |
| Sapur.15WG074200.1 | -2.806 | 5.030E-19  | HCT                    | hydroxycinnamoyl-Coa shikimate/quinate hydroxycinnamoyl transferase | Secondary Metabolism                  | cis   | lignin biosynthesis                                                                                                                                                                                     | UniProt       | -0.038179274 | -42.04% | 0.75570537  |
| Sapur.15WG074400.1 | -7.937 | 2.430E-240 | AGO4,DCP11             | Argonaute family protein                                            | RNA splicing and regulation           | cis   | RDDM pathway                                                                                                                                                                                            | TAIR          | 0.472315512  | 12.44%  | 0.403356956 |
| Sapur.15WG075200.1 | -4.031 | 3.510E-55  | ARR17,RR17             | response regulator 17                                               | Hormone signaling                     | cis   | Type-A cytokinin response regulator                                                                                                                                                                     | TAIR          | 0.033180883  | 5.46%   | 0.467423277 |
| Sapur.15WG079800.1 | -0.672 | 5.640E-64  | APRR1,ATDCL1,PRR1,TOC1 | timing of cab expression 1/PRR response regulator 1                 | Transcription; Floral Development     | cis   | Two component cytokinin response                                                                                                                                                                        | UniProt       | -5.345270439 | -18.70% | 0.933899357 |
| Sapur.15WG084600.1 | 0.932  | 1.070E-47  | 1,HD-ZIP1              | homeobox 1                                                          | Transcription                         | trans | Leaf development, transcriptional activator                                                                                                                                                             | UniProt       | 8.681407324  | 17.29%  | 0.333599211 |
| Sapur.15WG088100.2 | 0.522  | 1.380E-05  |                        | MYB transcription factor, putative                                  | Transcription                         | trans |                                                                                                                                                                                                         | -             | 0.24983345   | 36.02%  | 0.329170612 |
| Sapur.15WG100700.1 | -0.308 | 3.618E-04  | ATMYB86,MYB86          | R2R3-MYB transcription factor, putative                             | Transcription                         | trans | sinapate ester production                                                                                                                                                                               | UniProt       | -0.124090837 | -6.11%  | 0.572955811 |
| Sapur.15WG112100.1 | -0.657 | 1.280E-35  | ARR1-8P,ARR2,HSS,ORE14 | auxin response factor 2                                             | Hormone Signaling; Floral Development | trans | promotes flowering and stamen development                                                                                                                                                               | UniProt       | 12.25471372  | 8.57%   | 0.35917787  |
| Sapur.15ZG033300.5 | -2.114 | 3.790E-15  | ATPIN1,PIN1            | auxin efflux carrier component 1                                    | Hormone Signaling                     | cis   | Auxin gradient formation during organogenesis                                                                                                                                                           | UniProt       | 0.017399467  | 27.70%  | 0.379957203 |
| Sapur.15ZG035700.1 | -1.305 | 2.310E-24  | ATMYB6,MYB6            | MYB-like transcription factor                                       | Transcription                         | cis   |                                                                                                                                                                                                         | -             | 0.500036709  | 33.96%  | 0.24995866  |
| Sapur.15ZG039200.1 | -0.314 | 2.745E-03  | ADT2                   | argonate dehydratase 2                                              | Secondary Metabolism                  | cis   | catalyzes argenolate to phenylalanine                                                                                                                                                                   | TAIR          | 0.040965123  | 2.49%   | 0.470061794 |
| Sapur.15ZG048100.1 | 1.519  | 2.800E-07  | anak058,NAC058         | NAC transcription factor 005                                        | Transcription                         | cis   | nuclear and plasma membrane targeting                                                                                                                                                                   | TAIR          | 0.811795248  | 140.34% | 0.209895275 |
| Sapur.15ZG048600.1 | -7.267 | 0.000E+00  | BEE3                   | transcription factor BEE                                            | Transcription                         | cis   | brassinosteroid signalling                                                                                                                                                                              | TAIR; UniProt | 3.927666448  | 24.30%  | 0.259643207 |
| Sapur.15ZG053700.1 | 2.310  | 1.240E-34  | AtbZIP70,bZIP70        | bZIP transcription factor                                           | Transcription                         | cis   |                                                                                                                                                                                                         | -             | 1.064744139  | 35.48%  | 0.392857871 |
| Sapur.15ZG055400.1 | 0.578  | 9.180E-08  | ATTCP18,BRC1,TCP18     | transcription factor TCP24                                          | Transcription                         | cis   | Delays axillary bud outgrowth and development                                                                                                                                                           | UniProt       | -0.090461807 | -8.88%  | 0.569140319 |
| Sapur.15ZG055800.1 | 0.658  | 4.020E-72  |                        | AP2/B3-like transcriptional factor family protein                   | Transcription                         | cis   |                                                                                                                                                                                                         | -             | -0.294764643 | -2.76%  | 0.538203755 |
| Sapur.T004700.1    | -0.758 | 1.240E-137 | ATWRK20,WRKY20         | WRKY transcription factor                                           | Transcription                         | trans |                                                                                                                                                                                                         | -             | 2.558173434  | 14.98%  | 0.022182773 |
| Sapur.T004800.2    | -1.076 | 9.248E-04  | SC5                    | scarecrow-like 5                                                    | Transcription                         | trans | Involved in plant development                                                                                                                                                                           | UniProt       | 0.037533222  | 128.96% | 0.132970903 |
| Sapur.T077300.1    | 1.342  | 1.290E-12  | CYP97B3                | cytochrome P450, family 97, subfamily B, polypeptide 3              | Secondary Metabolism                  | trans | xanthophyll biosynthesis, hydroxylates beta rings of beta carotene                                                                                                                                      | UniProt       | 0.149471863  | 4.47%   | 0.476844747 |
| Sapur.T078000.1    | 1.440  | 2.950E-28  | ATO                    | splicing factor-related                                             | RNA splicing and regulation           | trans | pre-spliceosome formation, necessary for gametic cell fate determination                                                                                                                                | UniProt       | 0.553787679  | 33.24%  | 0.325143777 |
| Sapur.T078100.1    | 1.418  | 1.060E-07  | CYP97B3                | cytochrome P450, family 97, subfamily B, polypeptide 3              | Secondary Metabolism                  | trans | xanthophyll biosynthesis, hydroxylates beta rings of beta carotene                                                                                                                                      | UniProt       | 0.018230052  | 2.13%   | 0.490838807 |
| Sapur.T168300.1    | -0.211 | 9.064E-03  |                        | PLATZ transcription factor family protein                           | Transcription                         | trans |                                                                                                                                                                                                         | -             | -0.000894472 | -16.26% | 0.522513077 |
