# Supplementary material for: Integrative genomics reveals paths to sex dimorphism in Salix purpurea L
Source: PubMed Central journal article supplement (PMC8325687; doi:10.1038/s41438-021-00606-y), 2021-08-01
Supplement: 41438_2021_606_MOESM10_ESM.pdf [file 41438_2021_606_MOESM10_ESM.pdf]

| ID                | Multimapping | Too Many Loci | Unique | Unique Reads |
|-------------------|--------------|---------------|--------|--------------|
| LIB-10X-317-003-1 | 2.93%        | 1.61%         | 92.67% | 16667892     |
| LIB-10X-317-004-1 | 3.30%        | 1.36%         | 92.08% | 14912152     |
| LIB-10X-317-005-1 | 2.55%        | 13.42%        | 78.88% | 15599256     |
| LIB-10X-317-006-1 | 2.83%        | 7.18%         | 85.96% | 16640857     |
| LIB-10X-317-007-1 | 2.65%        | 6.32%         | 87.51% | 16937903     |
| LIB-10X-317-008-1 | 2.98%        | 11.60%        | 81.15% | 17228442     |
| LIB-10X-317-011-1 | 2.88%        | 1.12%         | 92.50% | 17342461     |
| LIB-10X-317-012-1 | 2.75%        | 7.04%         | 86.64% | 18624312     |
| LIB-10X-317-013-1 | 2.77%        | 11.32%        | 81.28% | 10369926     |
| LIB-10X-317-013-2 | 2.82%        | 10.65%        | 81.57% | 34886998     |
| LIB-10X-317-014-1 | 3.29%        | 1.07%         | 92.86% | 6162059      |
| LIB-10X-317-014-2 | 3.29%        | 1.13%         | 92.58% | 21958768     |
| LIB-10X-317-015-1 | 2.79%        | 1.62%         | 91.85% | 16092620     |
| LIB-10X-317-016-1 | 2.27%        | 21.37%        | 69.26% | 13170124     |
| LIB-10X-317-017-1 | 2.79%        | 0.56%         | 93.98% | 22354210     |
| LIB-10X-317-019-1 | 2.72%        | 19.54%        | 72.35% | 3098210      |
| LIB-10X-317-020-1 | 2.56%        | 9.08%         | 84.50% | 7192591      |
| LIB-10X-317-020-2 | 2.64%        | 8.80%         | 84.41% | 17760302     |
| LIB-10X-317-021-1 | 2.75%        | 11.15%        | 80.39% | 15825448     |
| LIB-10X-317-024-1 | 2.79%        | 3.61%         | 88.20% | 19277236     |
| LIB-10X-317-028-1 | 3.29%        | 3.44%         | 89.31% | 16781121     |
| LIB-10X-317-029-1 | 2.61%        | 16.51%        | 75.58% | 13997204     |
| LIB-10X-317-033-1 | 2.64%        | 8.39%         | 83.91% | 13715097     |
| LIB-10X-317-034-1 | 2.63%        | 18.53%        | 72.22% | 14433204     |
| LIB-10X-317-035-1 | 2.59%        | 23.00%        | 68.72% | 29354164     |
| LIB-10X-317-036-1 | 3.40%        | 0.83%         | 92.89% | 8584207      |
| LIB-10X-317-036-2 | 3.22%        | 0.98%         | 93.24% | 21119986     |
| LIB-10X-317-038-1 | 3.07%        | 0.71%         | 93.71% | 9026277      |
| LIB-10X-317-038-2 | 3.10%        | 0.71%         | 93.35% | 20583954     |
| LIB-10X-317-040-1 | 2.48%        | 16.84%        | 75.14% | 16123911     |
| LIB-10X-317-041-1 | 2.67%        | 11.94%        | 80.70% | 16640902     |
| LIB-10X-317-042-1 | 3.86%        | 0.63%         | 92.69% | 4377373      |
| LIB-10X-317-044-1 | 2.99%        | 1.21%         | 92.98% | 19774499     |
| LIB-10X-317-045-1 | 3.02%        | 0.49%         | 93.51% | 8491101      |
| LIB-10X-317-045-2 | 2.99%        | 0.52%         | 93.19% | 20913853     |
| LIB-10X-317-046-1 | 2.91%        | 0.99%         | 93.14% | 19201702     |
| LIB-10X-317-047-1 | 3.06%        | 0.54%         | 93.60% | 9918678      |
| LIB-10X-317-047-2 | 3.05%        | 0.54%         | 93.39% | 26325702     |
| LIB-10X-317-049-1 | 3.44%        | 0.78%         | 93.31% | 8057677      |

|                   |       |        |        |          |
|-------------------|-------|--------|--------|----------|
| LIB-10X-317-049-2 | 3.45% | 0.79%  | 93.04% | 18638486 |
| LIB-10X-317-050-1 | 2.53% | 19.50% | 73.34% | 15951747 |
| LIB-10X-317-052-1 | 2.47% | 27.04% | 64.34% | 7541144  |
| LIB-10X-317-054-1 | 3.15% | 6.16%  | 87.25% | 14360578 |
| LIB-10X-317-055-1 | 2.67% | 8.73%  | 83.72% | 14901369 |
| LIB-10X-317-056-1 | 2.68% | 8.79%  | 84.12% | 15737966 |
| LIB-10X-317-058-1 | 2.52% | 17.54% | 74.28% | 14807429 |
| LIB-10X-317-059-1 | 2.51% | 16.40% | 74.72% | 16276156 |
| LIB-10X-317-060-1 | 3.21% | 1.11%  | 92.87% | 19488827 |
| LIB-10X-317-061-1 | 2.94% | 0.56%  | 93.81% | 20011598 |
| LIB-10X-317-065-1 | 2.79% | 0.97%  | 93.43% | 22096604 |
| LIB-10X-317-068-1 | 2.73% | 16.15% | 74.81% | 15798298 |
| LIB-10X-317-069-1 | 2.88% | 0.94%  | 92.21% | 17561046 |
| LIB-10X-317-076-1 | 2.85% | 7.84%  | 84.68% | 15362125 |
| LIB-10X-317-078-1 | 3.29% | 3.57%  | 89.15% | 18653163 |
| LIB-10X-317-081-1 | 2.92% | 2.83%  | 90.50% | 16851292 |
| LIB-10X-317-086-1 | 2.75% | 10.52% | 82.37% | 15778316 |
| LIB-10X-317-089-1 | 3.10% | 2.25%  | 90.57% | 13724617 |
| LIB-10X-317-091-1 | 3.08% | 9.09%  | 83.83% | 9142134  |
| LIB-10X-317-092-1 | 2.89% | 4.55%  | 88.81% | 16264585 |
| LIB-10X-317-093-1 | 2.81% | 12.20% | 79.42% | 16078319 |
| LIB-10X-317-097-1 | 1.86% | 34.16% | 54.41% | 10015446 |
| LIB-10X-317-099-1 | 1.67% | 39.24% | 48.79% | 9101515  |
| LIB-10X-317-100-1 | 1.68% | 51.67% | 35.56% | 6346474  |
| LIB-10X-317-101-1 | 1.99% | 35.71% | 51.83% | 10653830 |
| LIB-10X-317-102-1 | 2.99% | 0.91%  | 93.11% | 15300581 |
| LIB-10X-317-104-1 | 2.69% | 16.02% | 75.67% | 14866482 |
| LIB-10X-317-105-1 | 2.91% | 1.66%  | 92.27% | 15273647 |
| LIB-10X-317-106-1 | 2.84% | 0.60%  | 93.82% | 17095088 |
| LIB-10X-317-107-1 | 3.38% | 0.81%  | 92.93% | 16365308 |
| LIB-10X-317-108-1 | 3.06% | 1.35%  | 92.36% | 21192587 |
| LIB-10X-317-109-1 | 2.65% | 10.98% | 80.92% | 15715467 |
| LIB-10X-317-112-1 | 2.69% | 13.61% | 78.08% | 13213751 |
| LIB-10X-317-113-1 | 3.36% | 0.57%  | 92.13% | 22019096 |
| LIB-10X-317-114-1 | 1.81% | 45.14% | 41.19% | 5482883  |
| LIB-10X-317-115-1 | 2.69% | 19.43% | 72.65% | 14447187 |
| LIB-10X-317-117-1 | 3.06% | 0.55%  | 93.43% | 19160634 |
| LIB-10X-317-120-1 | 3.02% | 0.82%  | 93.33% | 18902989 |
| LIB-10X-317-121-1 | 3.28% | 0.58%  | 93.39% | 21503386 |
| LIB-10X-317-122-1 | 2.76% | 2.82%  | 91.54% | 16812332 |
| LIB-10X-317-124-1 | 3.12% | 0.49%  | 93.16% | 22176339 |

|                   |       |        |        |          |
|-------------------|-------|--------|--------|----------|
| LIB-10X-317-127-1 | 3.70% | 1.02%  | 92.79% | 8413713  |
| LIB-10X-317-127-2 | 3.72% | 1.01%  | 92.45% | 18980110 |
| LIB-10X-317-129-1 | 2.74% | 6.46%  | 87.30% | 15244645 |
| LIB-10X-317-134-1 | 1.47% | 42.78% | 46.96% | 3235766  |
| LIB-10X-317-134-2 | 1.56% | 41.45% | 47.80% | 9396522  |
| LIB-10X-317-135-1 | 3.05% | 0.74%  | 92.20% | 5029802  |
| LIB-10X-317-135-2 | 3.11% | 0.70%  | 91.71% | 18251258 |
| LIB-10X-317-136-1 | 2.87% | 4.91%  | 89.45% | 5746327  |
| LIB-10X-317-136-2 | 2.91% | 4.99%  | 89.06% | 14220871 |
| LIB-10X-317-138-1 | 1.77% | 36.66% | 51.84% | 8769333  |
| LIB-10X-317-139-1 | 2.09% | 32.08% | 58.56% | 5292155  |
| LIB-10X-317-139-2 | 2.14% | 31.37% | 58.73% | 12404207 |
| LIB-10X-317-140-1 | 3.01% | 5.40%  | 88.05% | 7021534  |
| LIB-10X-317-140-2 | 3.06% | 5.12%  | 88.04% | 17903153 |
| LIB-10X-317-141-1 | 1.88% | 36.45% | 52.31% | 9982491  |
| LIB-10X-317-145-1 | 1.86% | 37.11% | 53.00% | 6780562  |
| LIB-10X-317-145-2 | 1.83% | 38.06% | 51.64% | 12657563 |
| LIB-10X-317-146-1 | 3.44% | 2.08%  | 91.68% | 11668988 |
| LIB-10X-317-146-2 | 3.38% | 2.30%  | 91.32% | 24970050 |
| LIB-10X-317-147-1 | 2.80% | 1.03%  | 92.58% | 16748055 |
| LIB-10X-317-149-1 | 2.89% | 1.55%  | 91.86% | 22276314 |
| LIB-10X-317-152-1 | 2.99% | 1.24%  | 92.19% | 19986617 |
| LIB-10X-317-153-1 | 2.99% | 0.73%  | 92.74% | 20263154 |
| LIB-10X-317-155-1 | 3.29% | 1.25%  | 92.63% | 9558224  |
| LIB-10X-317-155-2 | 3.31% | 1.23%  | 92.37% | 21157118 |
| LIB-10X-317-156-1 | 3.04% | 0.87%  | 93.62% | 15695950 |
| LIB-10X-317-159-1 | 2.54% | 17.20% | 74.47% | 7624886  |
| LIB-10X-317-159-2 | 2.54% | 17.32% | 74.25% | 7948678  |
| LIB-10X-317-161-1 | 2.72% | 7.06%  | 85.11% | 5538764  |
| LIB-10X-317-161-2 | 2.76% | 7.06%  | 84.53% | 15423940 |
| LIB-10X-317-163-1 | 2.86% | 0.98%  | 93.64% | 16520816 |
| LIB-10X-317-164-1 | 3.35% | 2.86%  | 91.16% | 7407459  |
| LIB-10X-317-164-2 | 3.33% | 3.09%  | 90.70% | 23003487 |
| LIB-10X-317-165-1 | 2.92% | 6.09%  | 87.39% | 10455268 |
| LIB-10X-317-165-2 | 2.92% | 6.80%  | 86.36% | 25106082 |
| LIB-10X-317-166-1 | 3.04% | 0.70%  | 93.86% | 7447451  |
| LIB-10X-317-168-1 | 2.75% | 9.21%  | 82.70% | 14897405 |
| LIB-10X-317-171-1 | 2.92% | 0.44%  | 94.07% | 17192714 |
| LIB-10X-317-175-1 | 2.01% | 31.61% | 56.89% | 8977429  |
| LIB-10X-317-176-1 | 3.05% | 3.43%  | 90.39% | 6531132  |
| LIB-10X-317-178-1 | 3.31% | 0.74%  | 93.24% | 11513276 |

|                   |       |        |        |          |
|-------------------|-------|--------|--------|----------|
| LIB-10X-317-178-2 | 3.28% | 0.80%  | 92.83% | 20802543 |
| LIB-10X-317-181-1 | 2.94% | 1.25%  | 92.52% | 17383416 |
| LIB-10X-317-182-1 | 3.15% | 1.05%  | 93.31% | 6635292  |
| LIB-10X-317-183-1 | 2.91% | 1.34%  | 93.31% | 6691702  |
| LIB-10X-317-184-1 | 3.05% | 1.82%  | 91.79% | 5405208  |
| LIB-10X-317-186-1 | 3.34% | 0.70%  | 92.74% | 3975394  |
| LIB-10X-317-190-1 | 2.91% | 1.75%  | 92.92% | 13144042 |
| LIB-10X-317-191-1 | 3.41% | 0.63%  | 93.38% | 8298361  |
| LIB-10X-317-191-2 | 3.45% | 0.66%  | 93.00% | 18199939 |
| LIB-10X-317-192-1 | 2.30% | 19.98% | 71.46% | 10272119 |
| LIB-10X-317-195-1 | 1.85% | 33.92% | 56.66% | 5768655  |
| LIB-10X-317-195-2 | 1.89% | 33.82% | 56.23% | 12415258 |
| LIB-10X-317-197-1 | 2.54% | 12.70% | 79.33% | 14107892 |
| LIB-10X-317-198-1 | 2.44% | 19.68% | 72.16% | 6523278  |
| LIB-10X-317-198-2 | 2.50% | 19.26% | 72.19% | 17629402 |
| LIB-10X-317-199-1 | 2.76% | 9.96%  | 82.82% | 15742760 |
| LIB-10X-317-201-1 | 2.80% | 5.13%  | 88.66% | 17109967 |
| LIB-10X-317-203-1 | 3.22% | 0.89%  | 92.55% | 12211895 |
| LIB-10X-317-203-2 | 3.29% | 0.90%  | 92.02% | 22032609 |
| LIB-10X-317-204-1 | 2.68% | 13.71% | 78.65% | 14001970 |
| LIB-11X-317-002-1 | 2.03% | 24.80% | 64.91% | 11440641 |
| LIB-11X-317-003-1 | 2.71% | 6.96%  | 86.56% | 8285691  |
| LIB-11X-317-003-2 | 2.69% | 7.09%  | 86.28% | 8689441  |
| LIB-11X-317-004-1 | 3.16% | 0.57%  | 93.71% | 8851009  |
| LIB-11X-317-004-2 | 3.20% | 0.58%  | 93.34% | 21150747 |
| LIB-11X-317-008-1 | 3.16% | 3.76%  | 90.58% | 8346009  |
| LIB-11X-317-008-2 | 3.21% | 3.92%  | 90.08% | 20736189 |
| LIB-11X-317-009-1 | 3.18% | 0.64%  | 93.10% | 9851943  |
| LIB-11X-317-009-2 | 3.24% | 0.63%  | 92.74% | 22206506 |
| LIB-11X-317-012-1 | 2.69% | 8.02%  | 85.20% | 5603753  |
| LIB-11X-317-012-2 | 2.69% | 8.79%  | 83.83% | 17508354 |
| LIB-11X-317-018-1 | 2.31% | 17.40% | 74.18% | 6706434  |
| LIB-11X-317-018-2 | 2.31% | 17.83% | 73.56% | 7312148  |
| LIB-11X-317-022-1 | 2.47% | 21.40% | 68.65% | 6488129  |
| LIB-11X-317-022-2 | 2.47% | 21.56% | 68.33% | 6631724  |
| LIB-11X-317-024-1 | 2.44% | 17.43% | 73.76% | 4611018  |
| LIB-11X-317-024-2 | 2.45% | 17.64% | 73.39% | 4877496  |
| LIB-11X-317-029-1 | 3.17% | 9.37%  | 83.75% | 6585239  |
| LIB-11X-317-029-2 | 3.07% | 11.00% | 81.62% | 15782751 |
| LIB-11X-317-030-1 | 2.76% | 3.87%  | 88.86% | 8171708  |
| LIB-11X-317-030-2 | 2.74% | 3.92%  | 88.66% | 8513187  |

|                   |       |        |        |          |
|-------------------|-------|--------|--------|----------|
| LIB-11X-317-034-1 | 2.60% | 12.10% | 78.56% | 6717616  |
| LIB-11X-317-034-2 | 2.59% | 12.15% | 77.98% | 7696685  |
| LIB-11X-317-039-1 | 3.28% | 1.09%  | 92.38% | 8269411  |
| LIB-11X-317-039-2 | 3.21% | 1.11%  | 91.87% | 18918471 |
| LIB-11X-317-042-1 | 2.96% | 1.22%  | 92.85% | 9065489  |
| LIB-11X-317-042-2 | 2.95% | 1.27%  | 92.41% | 20784842 |
| LIB-11X-317-043-1 | 2.56% | 19.07% | 72.58% | 8924422  |
| LIB-11X-317-043-2 | 2.55% | 19.69% | 71.47% | 16667724 |
| LIB-11X-317-046-1 | 3.03% | 2.75%  | 91.63% | 16987284 |
| LIB-11X-317-049-1 | 2.81% | 0.51%  | 93.50% | 18041268 |
| LIB-11X-317-051-1 | 3.11% | 5.73%  | 86.89% | 6262883  |
| LIB-11X-317-051-2 | 2.95% | 6.52%  | 86.01% | 15926093 |
| LIB-11X-317-055-1 | 1.57% | 46.01% | 40.48% | 6825668  |
| LIB-11X-317-058-1 | 3.16% | 0.59%  | 92.75% | 9743703  |
| LIB-11X-317-058-2 | 3.18% | 0.59%  | 92.29% | 23850310 |
| LIB-11X-317-060-1 | 2.38% | 22.79% | 68.14% | 5331139  |
| LIB-11X-317-060-2 | 2.42% | 22.27% | 68.33% | 16279661 |
| LIB-11X-317-063-1 | 1.84% | 40.15% | 49.93% | 3184831  |
| LIB-11X-317-063-2 | 1.90% | 40.36% | 49.19% | 11266596 |
| LIB-11X-317-064-1 | 2.74% | 7.83%  | 84.82% | 15546785 |
| LIB-11X-317-068-1 | 2.06% | 37.19% | 50.32% | 10302792 |
| LIB-11X-317-069-1 | 3.25% | 0.61%  | 93.54% | 7099620  |
| LIB-11X-317-069-2 | 3.27% | 0.63%  | 93.25% | 19148299 |
| LIB-11X-317-075-1 | 3.17% | 0.93%  | 93.69% | 8646239  |
| LIB-11X-317-075-2 | 3.18% | 0.90%  | 93.55% | 22118485 |
| LIB-11X-317-076-1 | 3.05% | 2.78%  | 90.90% | 6910918  |
| LIB-11X-317-076-2 | 3.11% | 2.69%  | 90.72% | 19911466 |
| LIB-11X-317-080-1 | 3.62% | 0.54%  | 93.79% | 15675963 |
| LIB-11X-317-083-1 | 2.77% | 18.75% | 73.25% | 21332234 |
| LIB-11X-317-084-1 | 2.85% | 0.57%  | 94.13% | 14706404 |
| LIB-11X-317-086-1 | 3.20% | 0.61%  | 94.24% | 13296574 |
| LIB-11X-317-089-1 | 2.95% | 0.74%  | 94.04% | 10741331 |
| LIB-11X-317-093-1 | 3.41% | 0.91%  | 92.96% | 22948150 |
| LIB-11X-317-103-1 | 1.86% | 41.64% | 48.34% | 5466356  |
| LIB-11X-317-106-1 | 2.99% | 0.66%  | 93.24% | 9428248  |
| LIB-11X-317-108-1 | 3.44% | 0.56%  | 93.65% | 14900429 |
| LIB-11X-317-110-1 | 2.92% | 0.80%  | 93.87% | 10958898 |
| LIB-11X-317-116-1 | 2.87% | 2.73%  | 91.31% | 9695403  |
| LIB-11X-317-117-1 | 3.24% | 0.69%  | 93.55% | 22370040 |
| LIB-11X-317-118-1 | 2.91% | 0.92%  | 93.22% | 28509195 |
| LIB-11X-317-123-1 | 2.99% | 3.46%  | 90.71% | 18810450 |

|                   |       |        |        |          |
|-------------------|-------|--------|--------|----------|
| LIB-11X-317-128-1 | 3.16% | 0.62%  | 92.53% | 20167179 |
| LIB-11X-317-130-1 | 3.27% | 0.55%  | 93.77% | 24760161 |
| LIB-11X-317-135-1 | 2.81% | 17.51% | 74.51% | 16292046 |
| LIB-11X-317-190-1 | 2.95% | 11.92% | 80.44% | 14522438 |
| LIB-11X-317-193-1 | 2.68% | 14.05% | 78.49% | 15591745 |
| LIB-11X-317-194-1 | 2.88% | 1.86%  | 91.94% | 29174127 |
| LIB-11X-317-197-1 | 3.00% | 1.46%  | 93.18% | 30414610 |
| LIB-11X-317-198-1 | 2.95% | 0.80%  | 93.10% | 29605152 |
| LIB-11X-317-199-1 | 2.45% | 16.44% | 74.44% | 12501530 |
| LIB-11X-317-200-1 | 2.91% | 0.97%  | 92.72% | 15939606 |
| LIB-11X-317-203-1 | 2.72% | 9.07%  | 83.52% | 12198905 |
| LIB-11X-317-204-1 | 2.73% | 1.05%  | 92.61% | 14478715 |
| LIB-11X-317-205-1 | 2.51% | 15.09% | 75.97% | 12263539 |
| LIB-11X-317-208-1 | 2.65% | 7.98%  | 84.21% | 15508658 |
| LIB-11X-317-212-1 | 2.26% | 17.74% | 72.69% | 17540133 |
| LIB-11X-317-213-1 | 3.08% | 4.27%  | 90.21% | 15604239 |
| LIB-11X-317-217-1 | 1.76% | 34.25% | 54.12% | 12808381 |
| LIB-11X-317-231-1 | 2.65% | 8.98%  | 83.30% | 18670087 |
| LIB-11X-317-232-1 | 2.74% | 2.08%  | 91.69% | 24079526 |
| LIB-11X-317-234-1 | 2.81% | 0.61%  | 93.83% | 22068082 |
| LIB-11X-317-239-1 | 2.87% | 2.58%  | 90.93% | 12630116 |
| LIB-11X-317-240-1 | 2.81% | 4.77%  | 88.02% | 40192100 |
| LIB-94006-1       | 3.34% | 8.37%  | 85.73% | 40586744 |

---
